# Supplementary material for: Synthesis and antiviral evaluation of base-modified deoxythreosyl nucleoside phosphonates
Source: Royal Society of Chemistry journal article supplement (doi:10.1039/c7ob01265a), 2017-01-01

## Supporting Information

### Synthesis and Antiviral Evaluation of Base-modified Deoxythreosyl Nucleoside Phosphonates

Chao Liu,<sup>†</sup> Shrinivas G. Dumbre,<sup>†</sup> Christophe Pannecouque,<sup>‡</sup> Brent Korba,<sup>§</sup> Steven De Jonghe,<sup>†</sup> and Piet Herdewijn<sup>\*,†</sup>

<sup>†</sup>Medicinal Chemistry, Rega Institute for Medical Research, KU Leuven, Herestraat 49, 3000 Leuven, Belgium

<sup>‡</sup>Laboratory of Virology and Chemotherapy, Department of Microbiology and Immunology, Rega Institute for Medical Research, KU Leuven, Herestraat 49, 3000 Leuven, Belgium

<sup>§</sup>Department of Microbiology and Immunology, Georgetown University Medical Center, Washington, DC 20057, USA

| <b>Contents:</b>                                               | <b>Page No.</b>       |
|----------------------------------------------------------------|-----------------------|
| 1. NMR spectra of compounds <b>2–40</b>                        | S2                    |
| 2. 2D NMR spectra of compound <b>11, 12, 19</b> and <b>20a</b> | S13, S16, S27 and S30 |

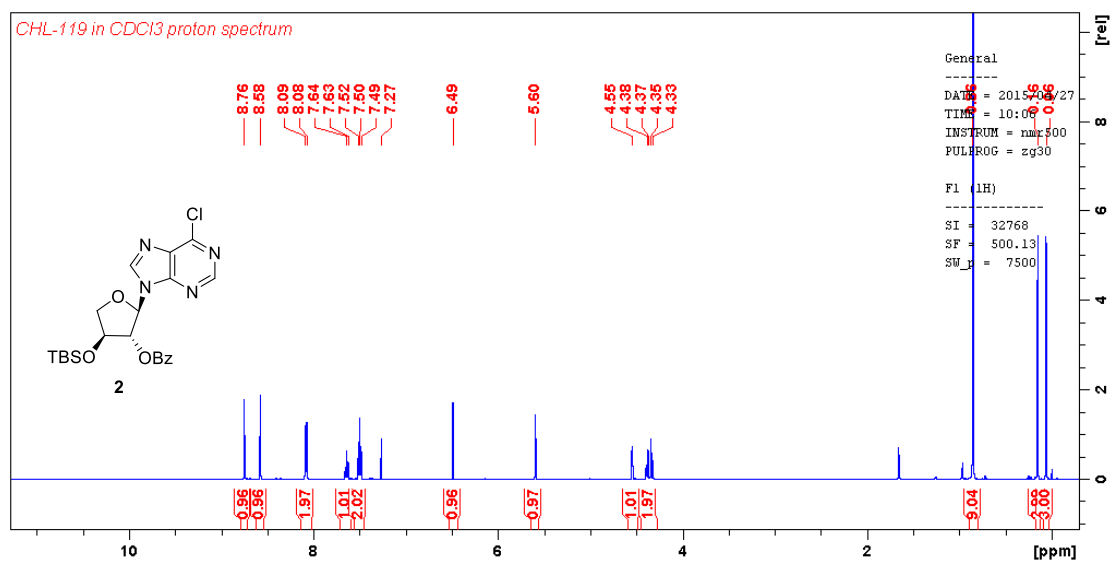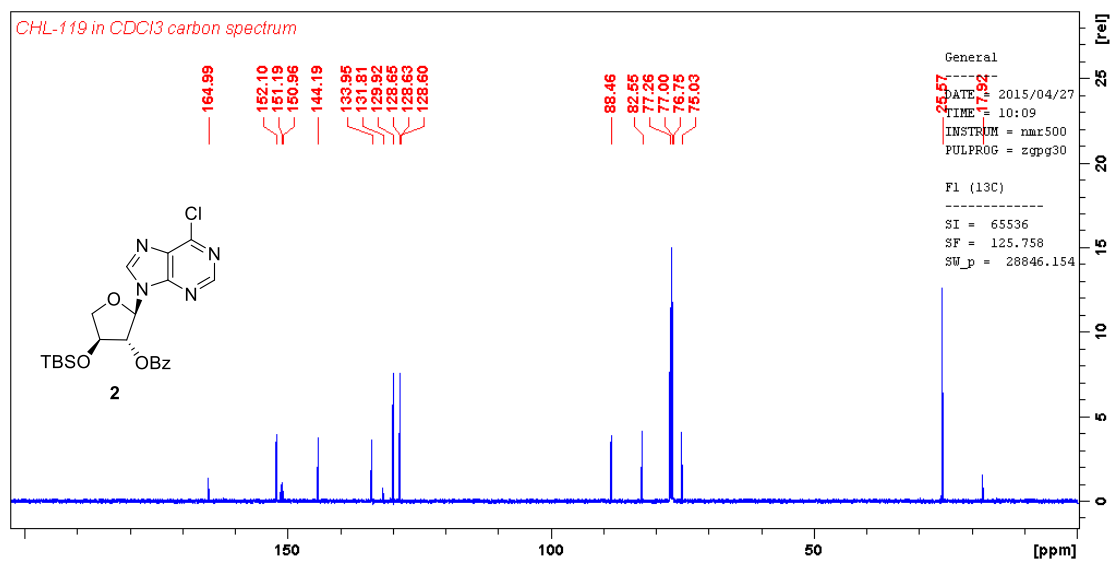

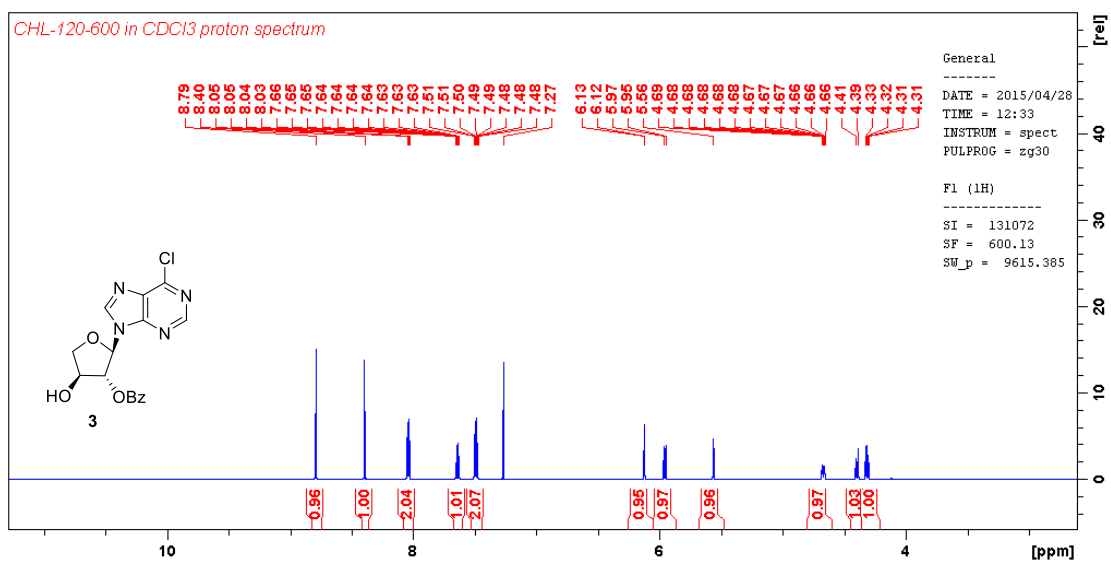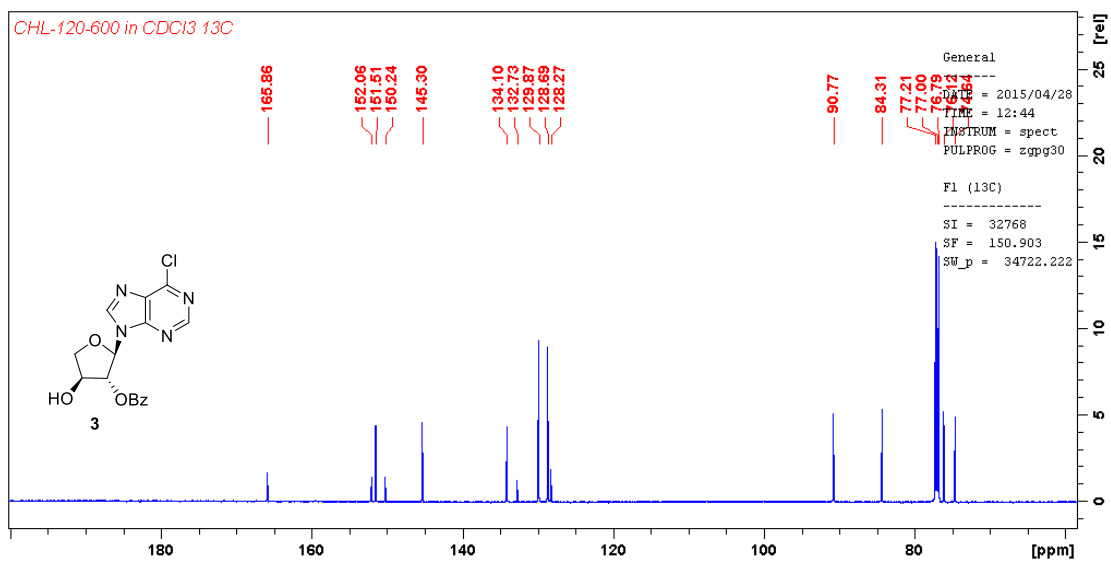

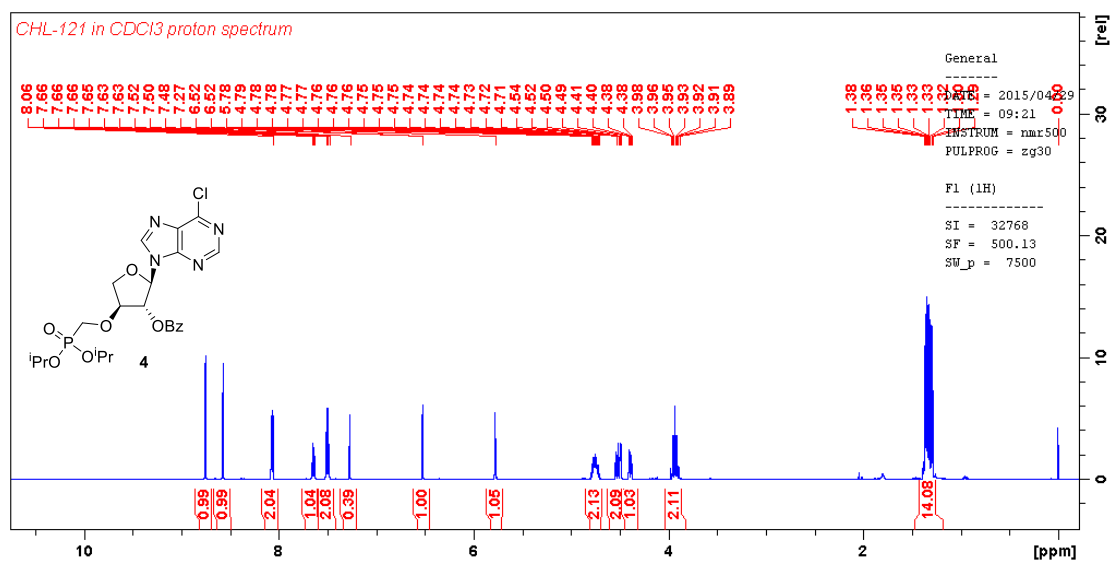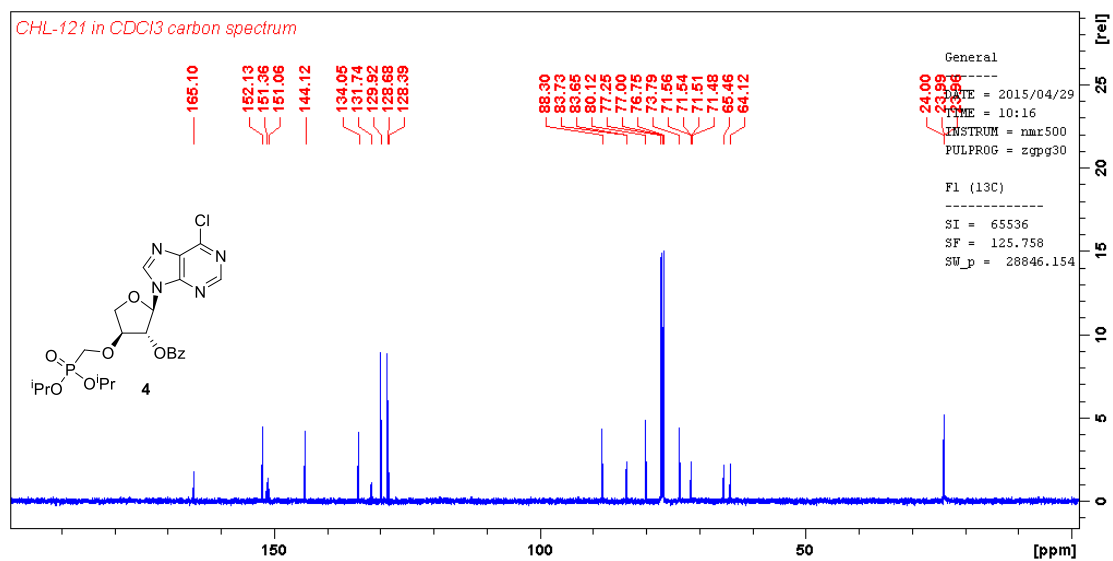





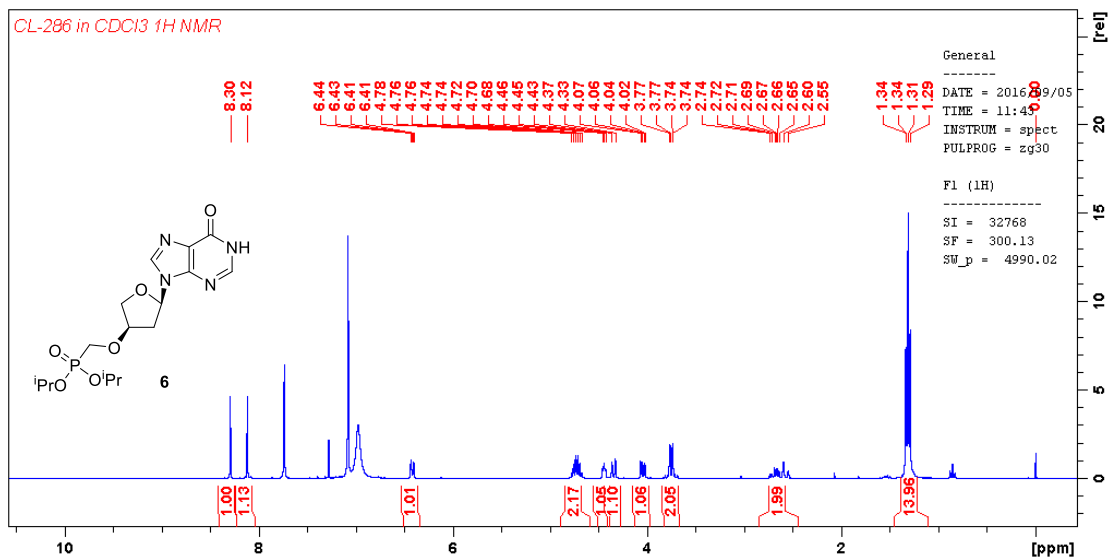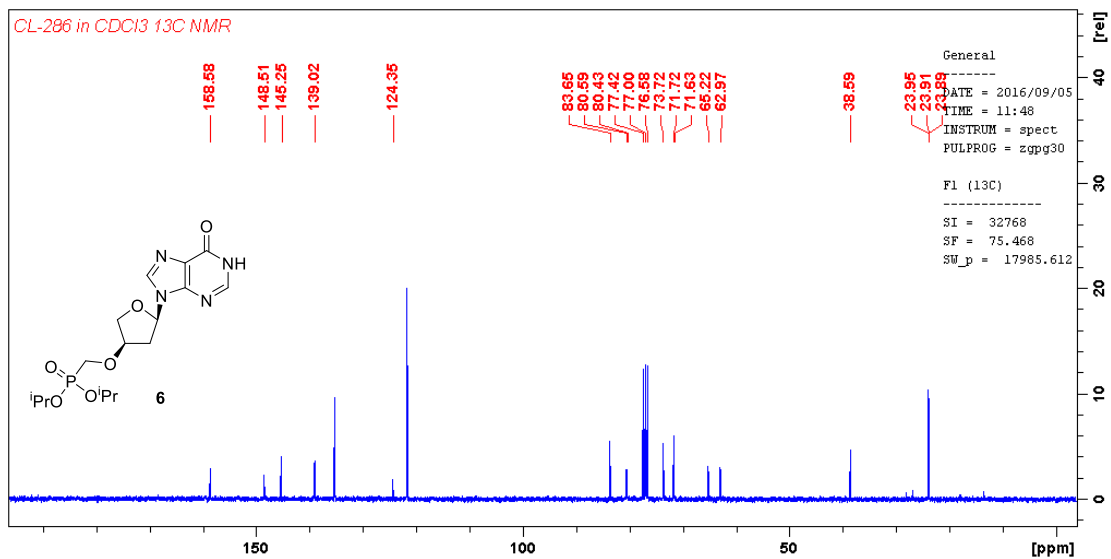

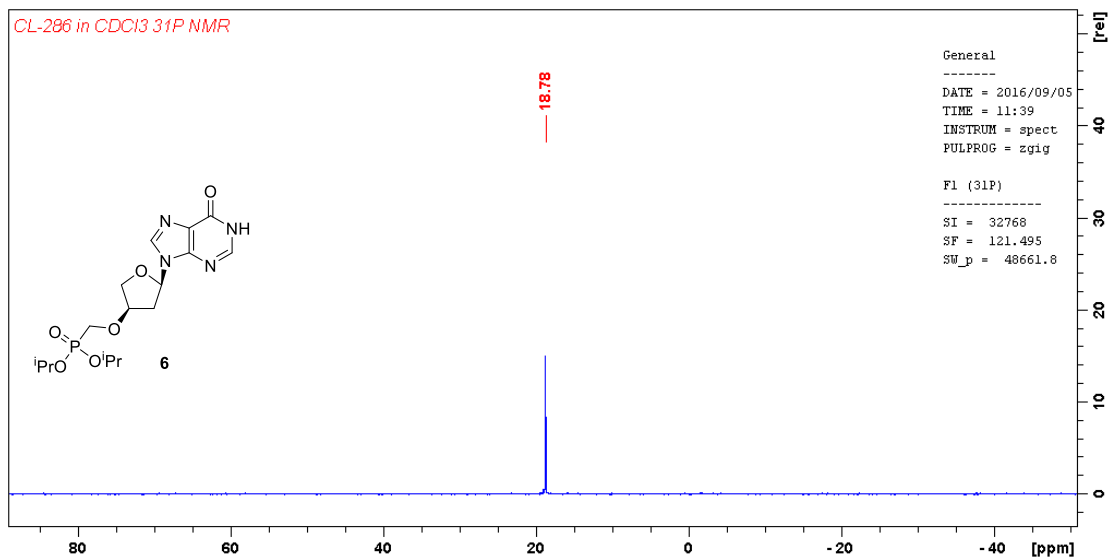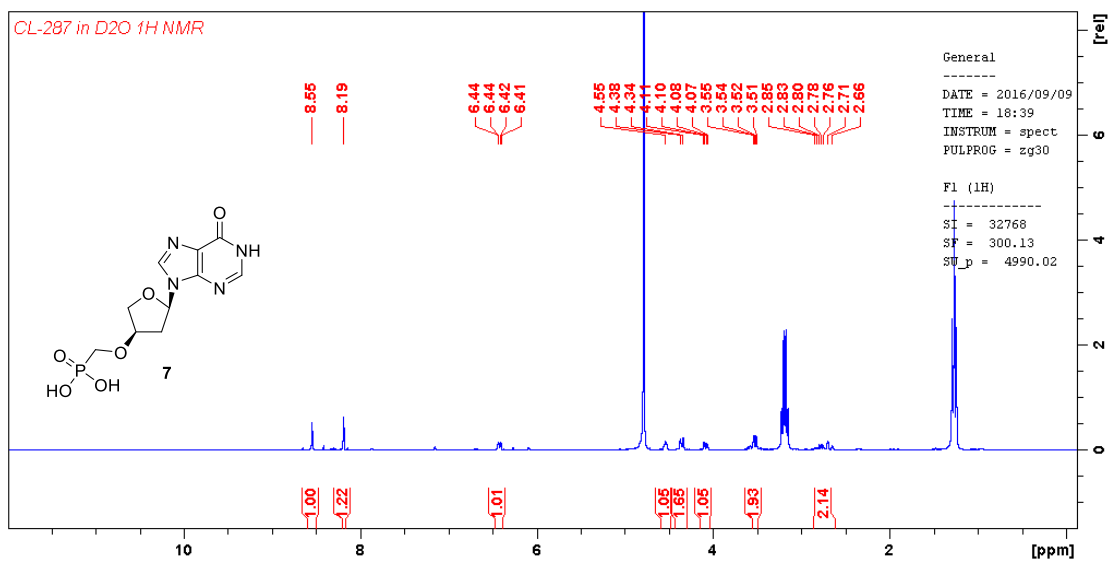



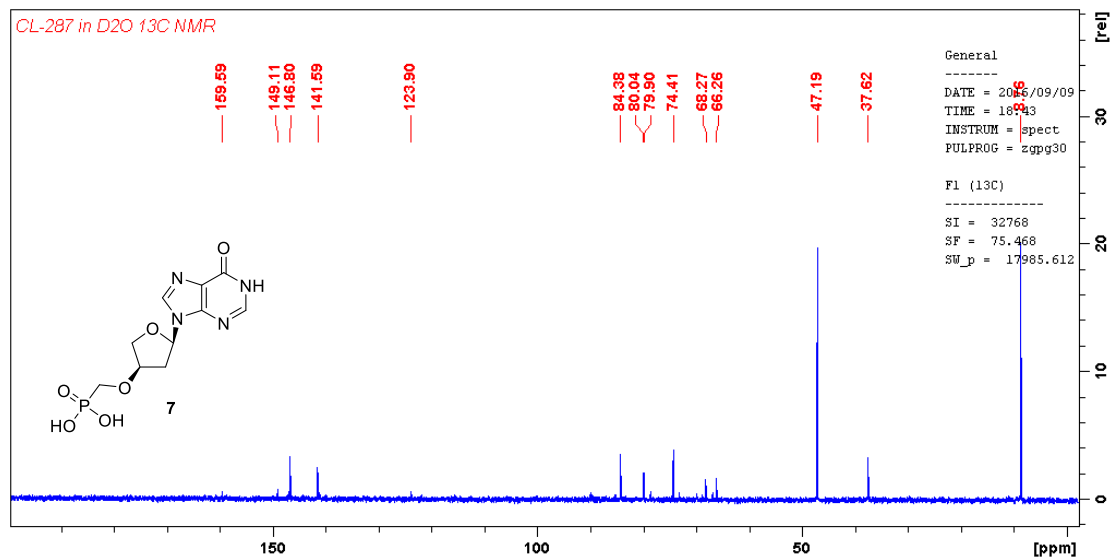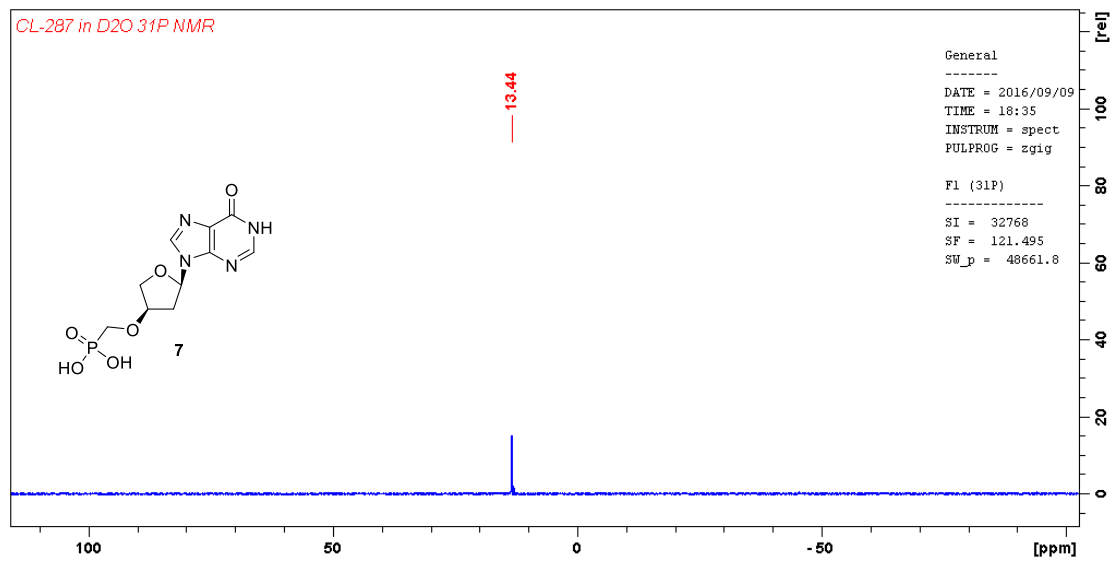

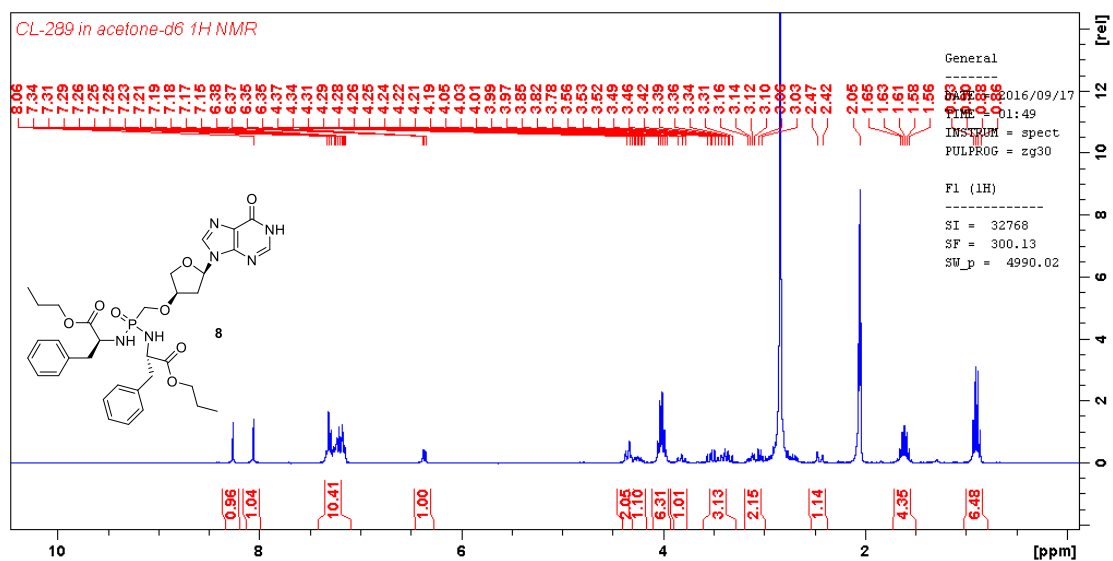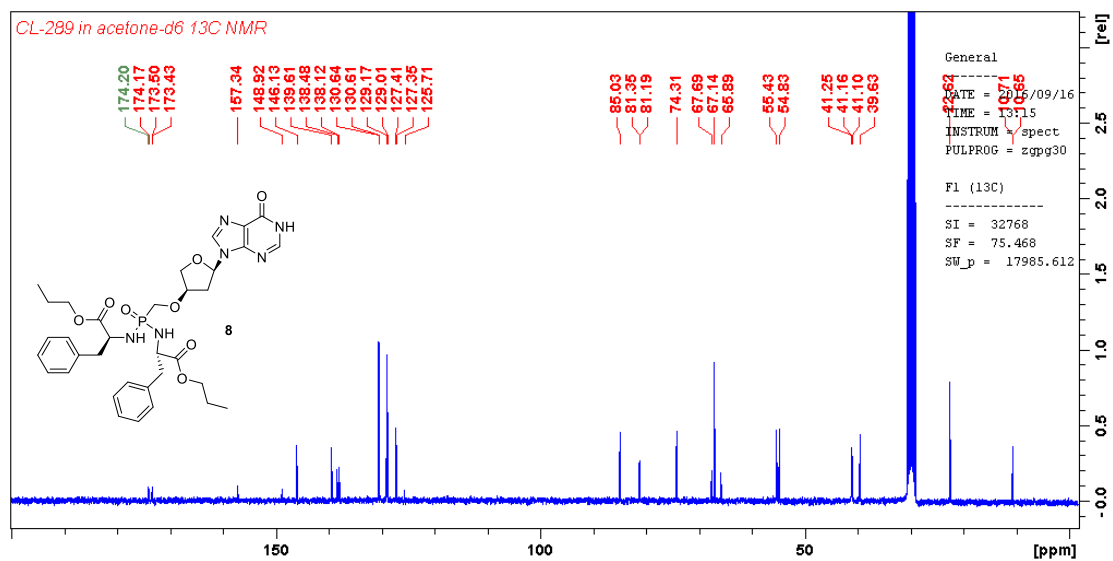

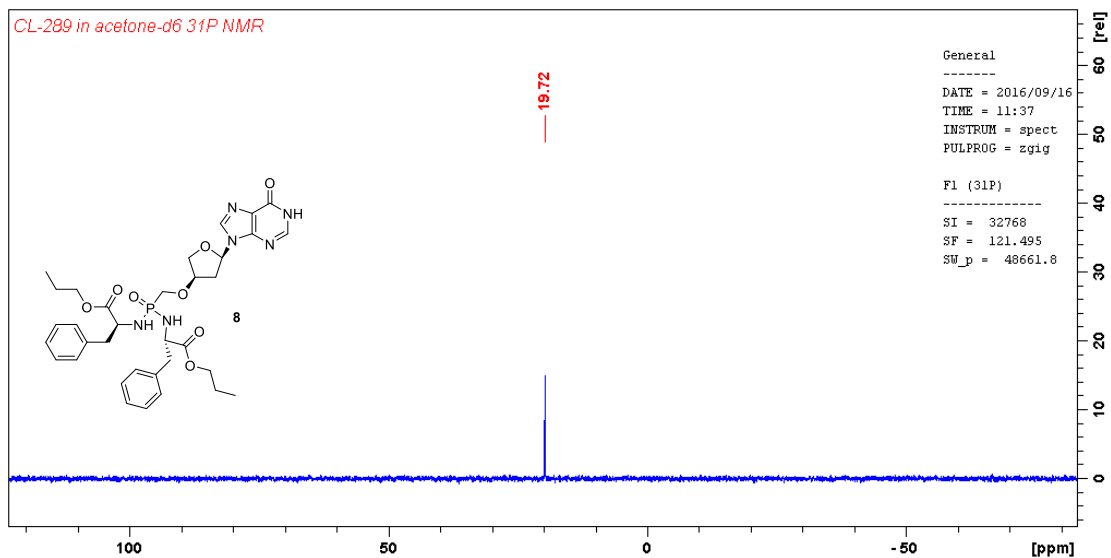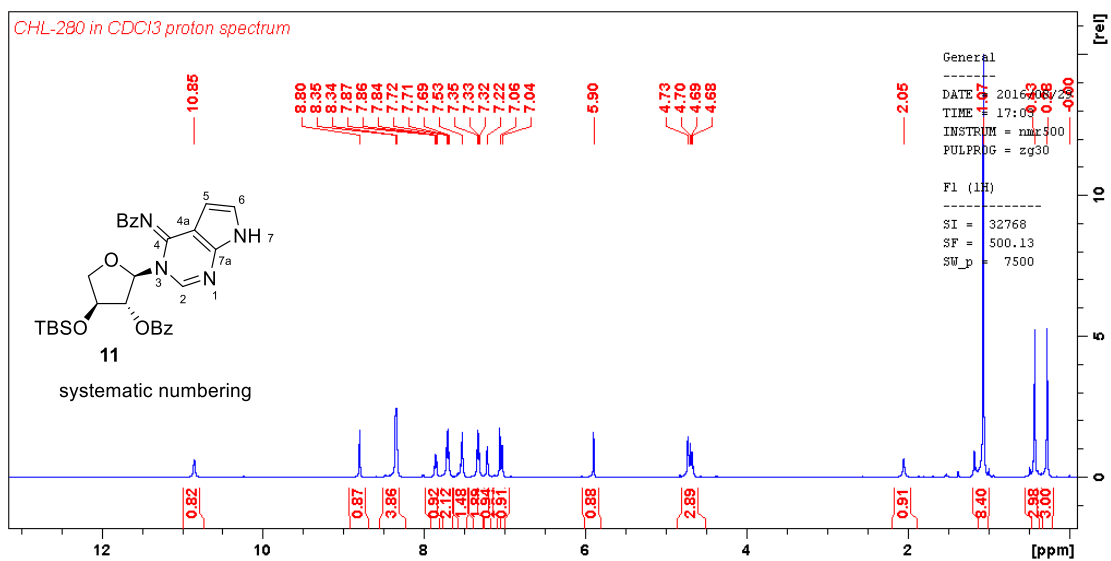

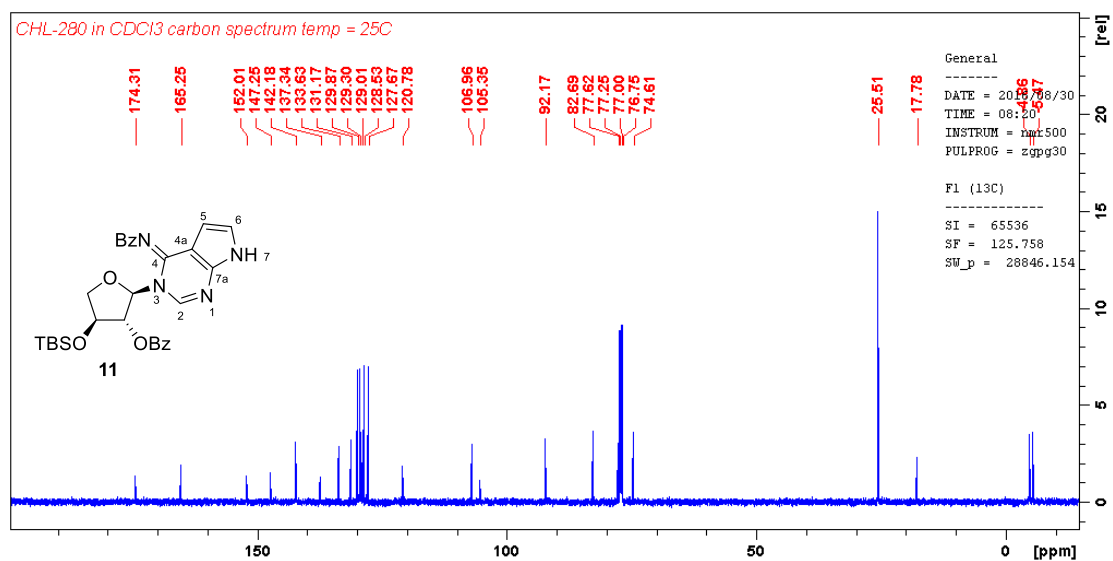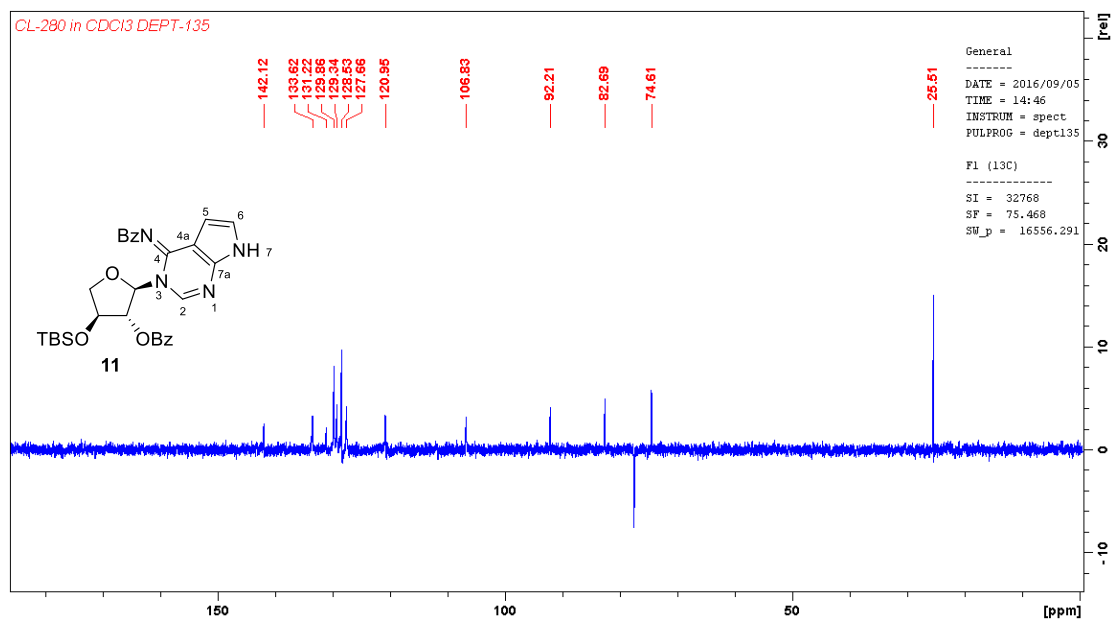

## 2D NMR Spectra of **11**

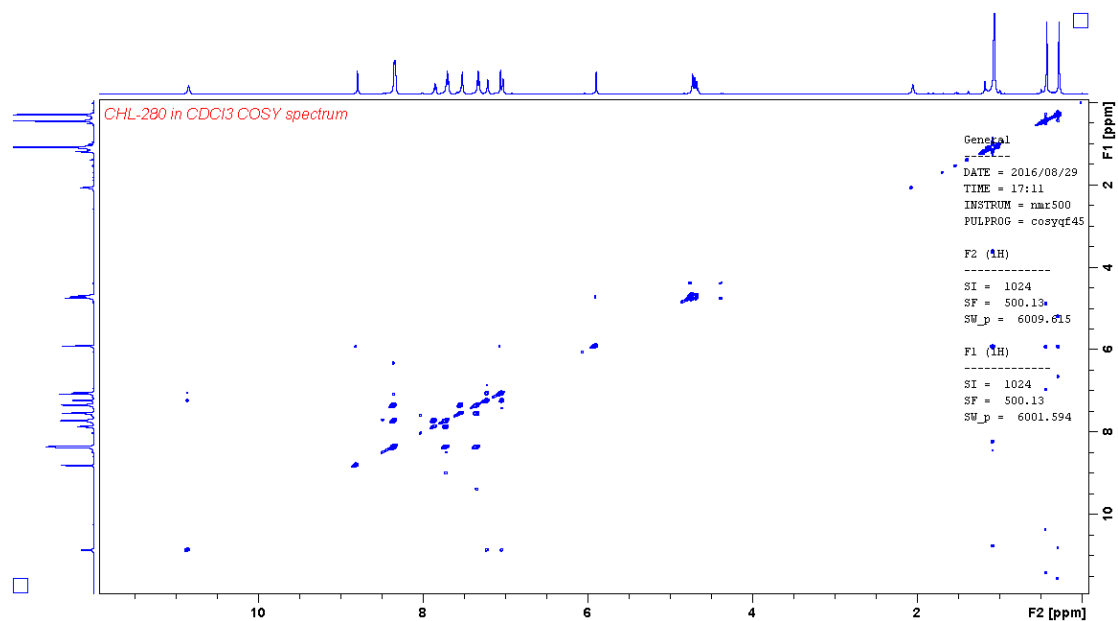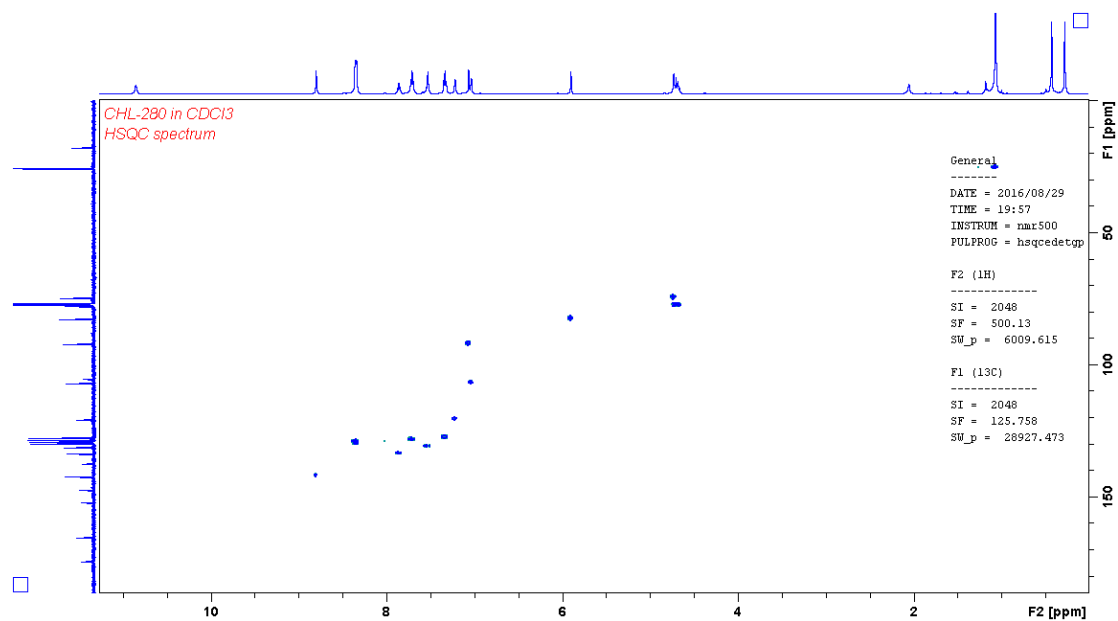

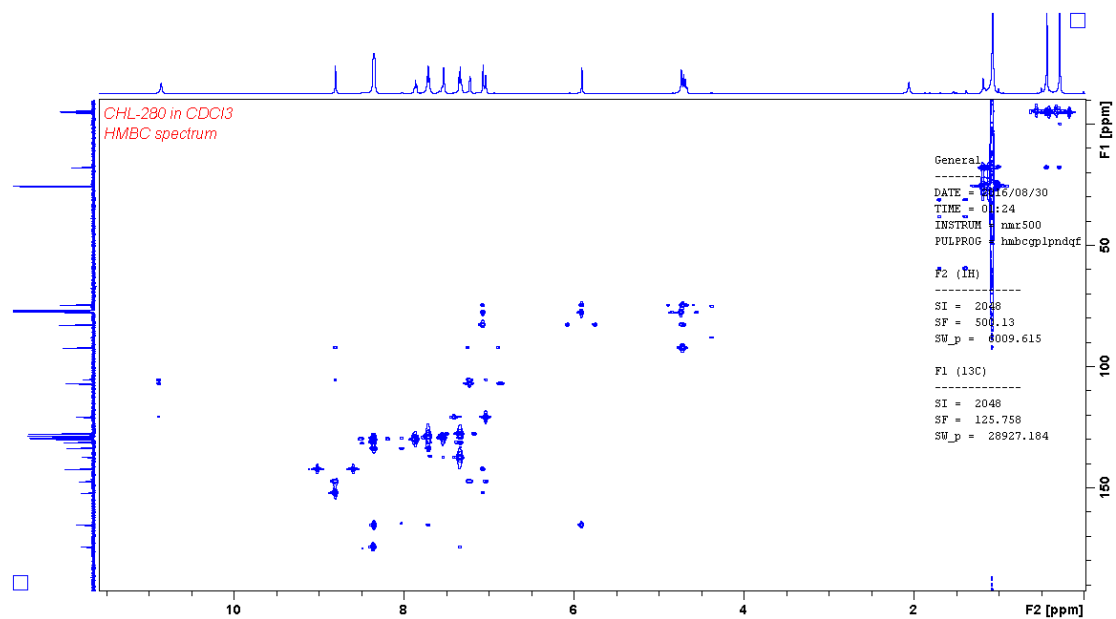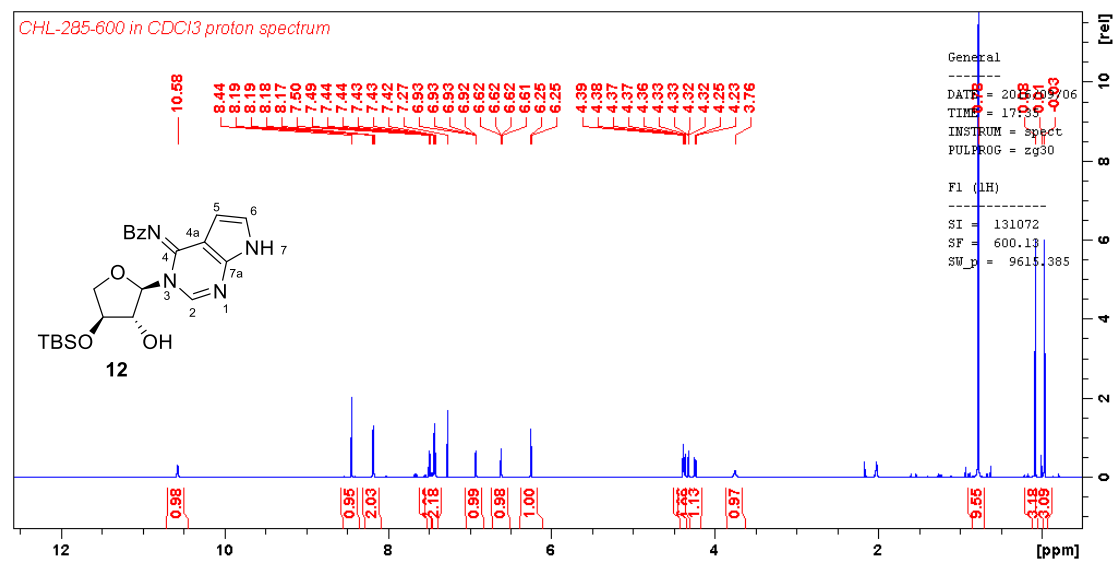

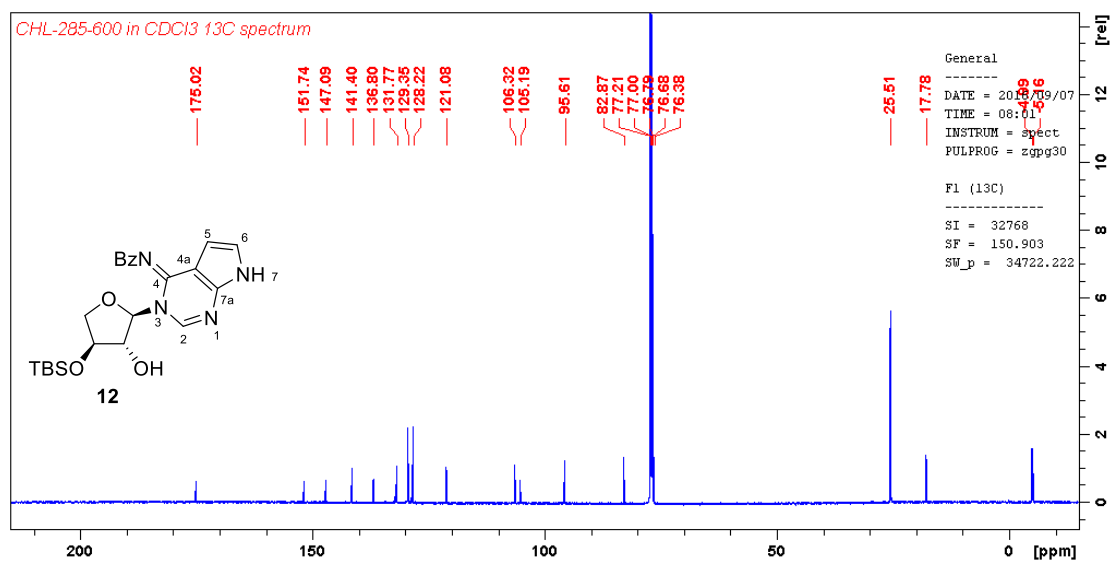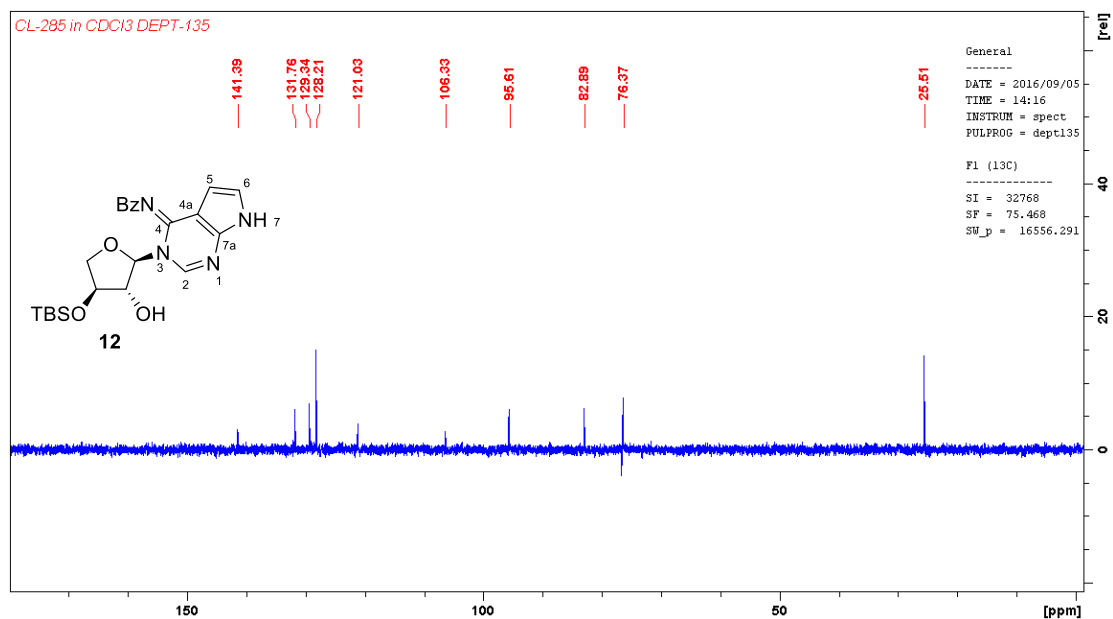

## 2D NMR Spectra of **12**

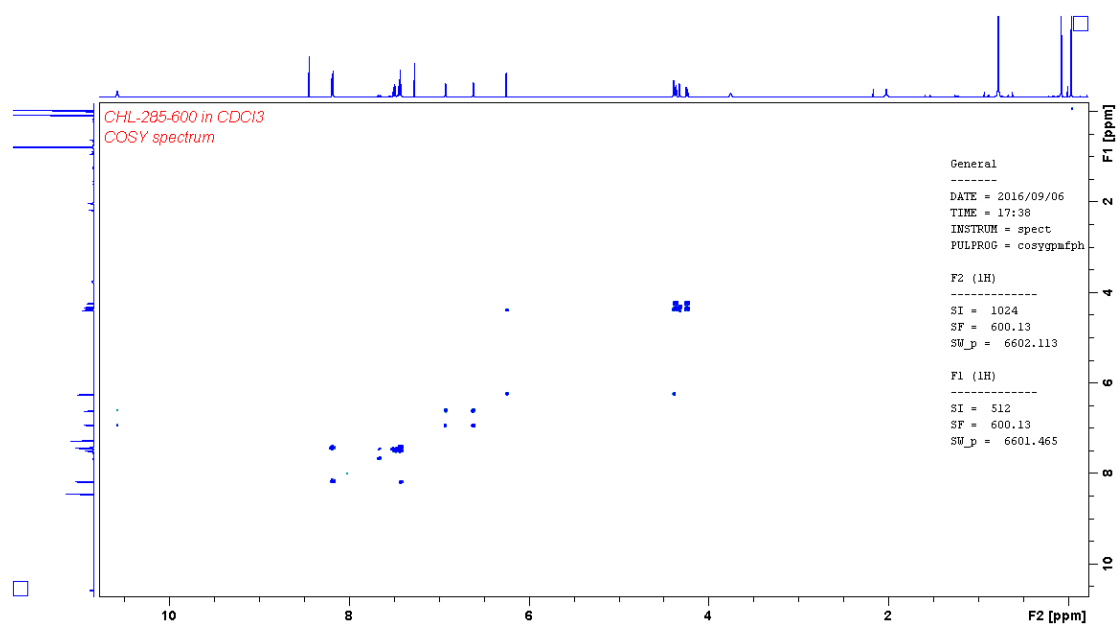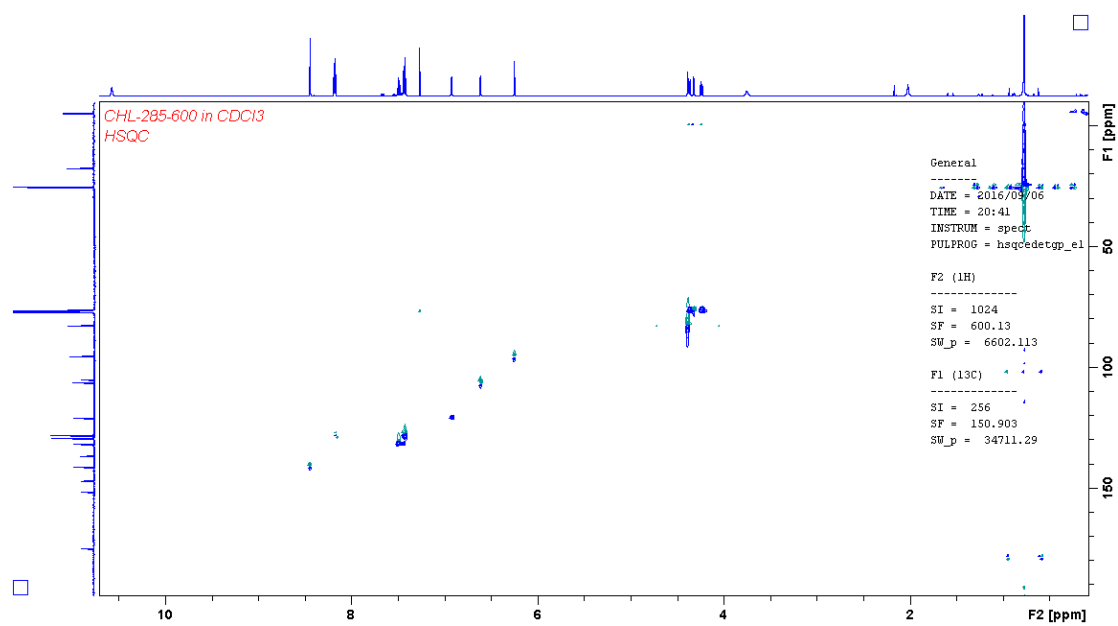



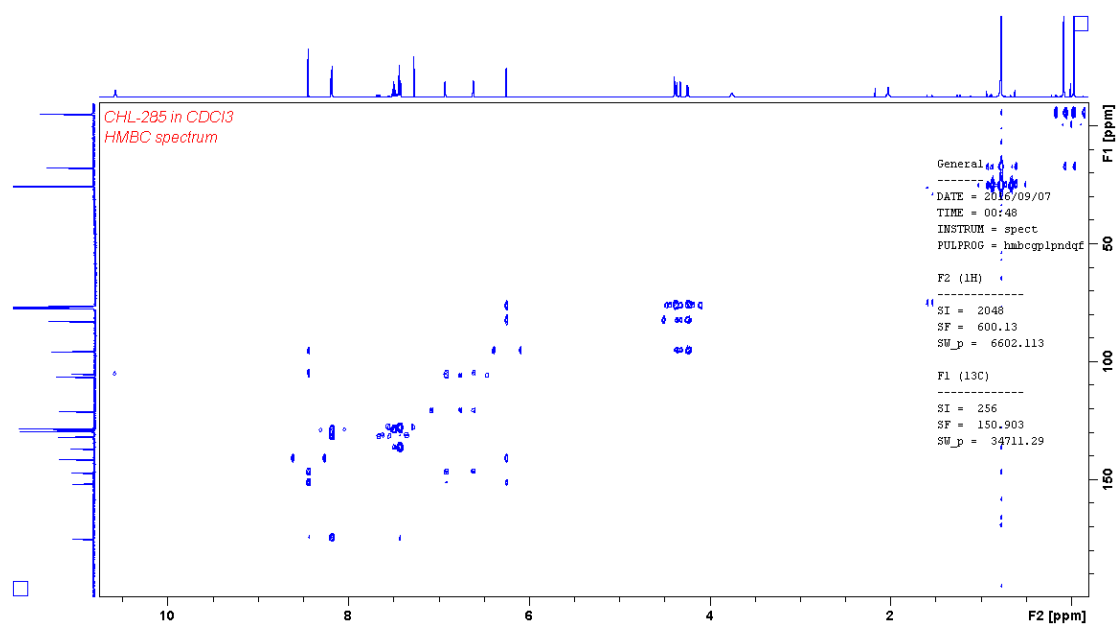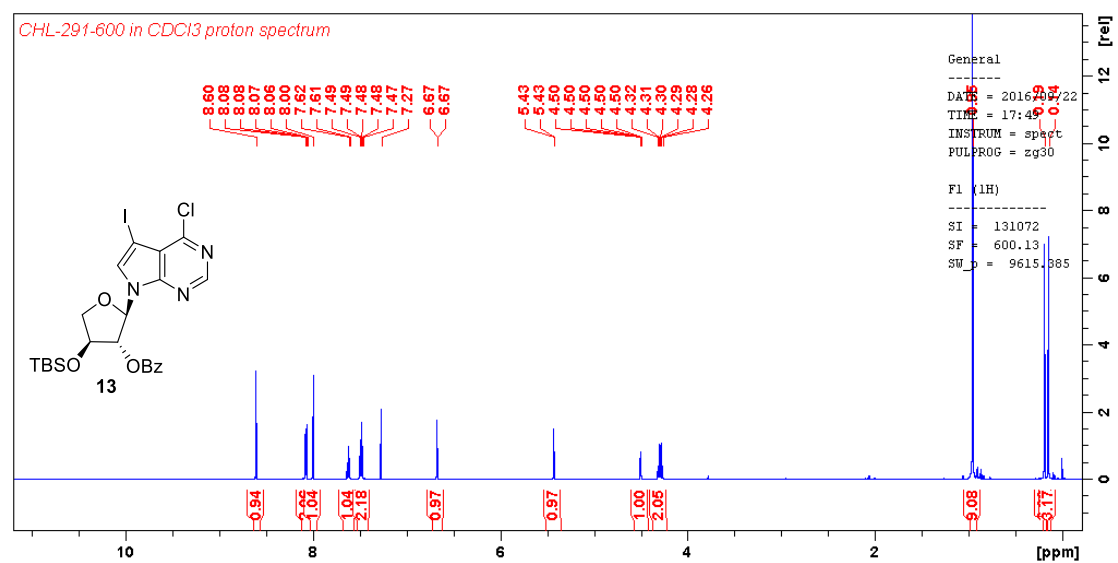



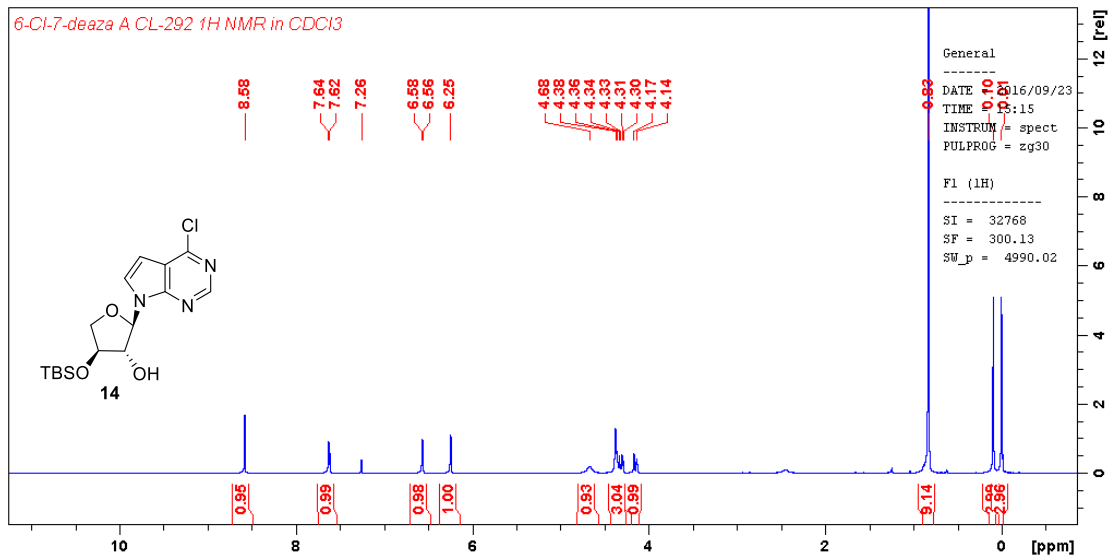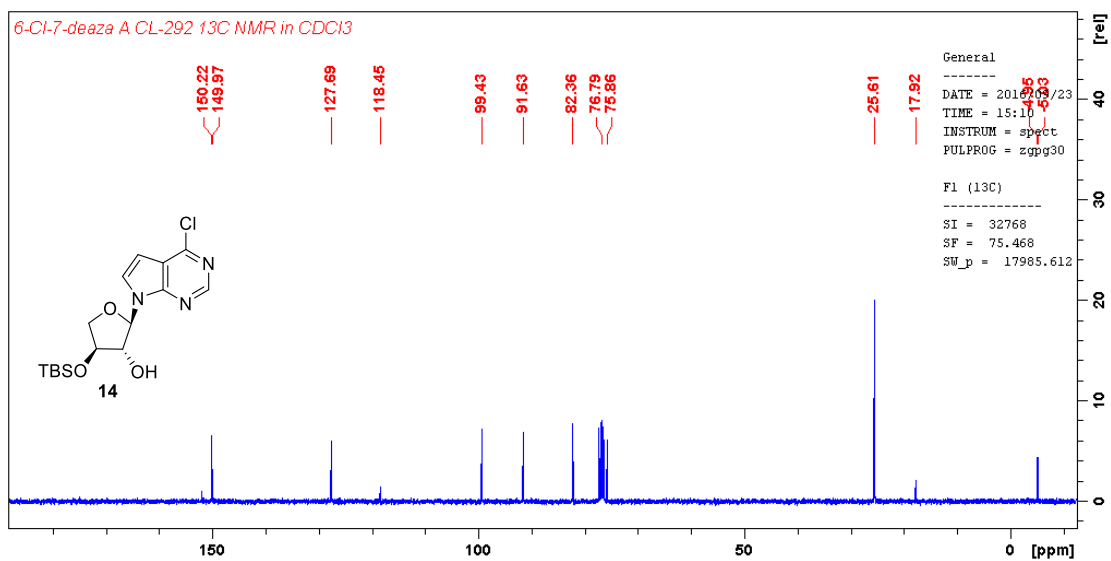

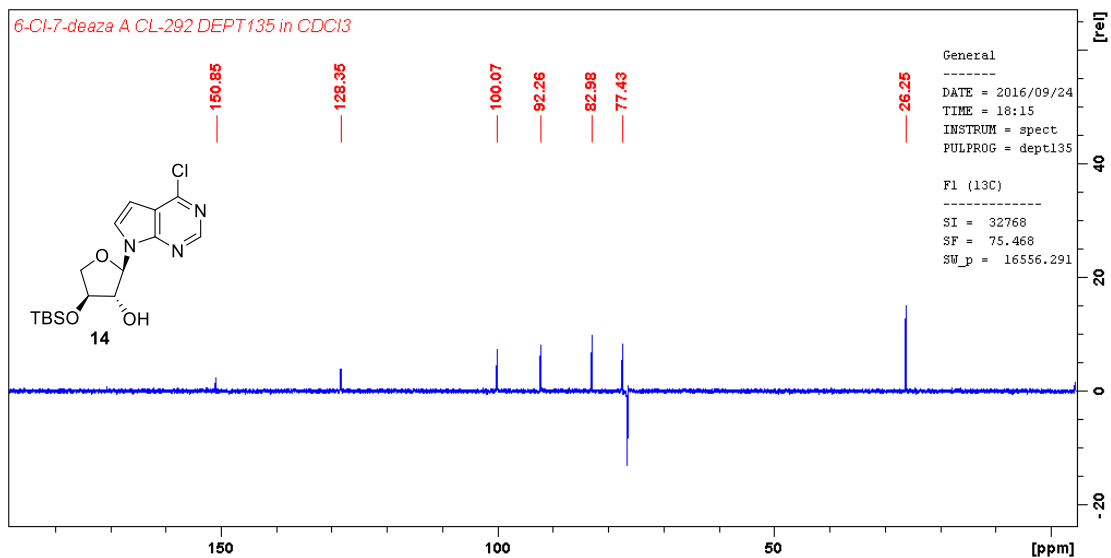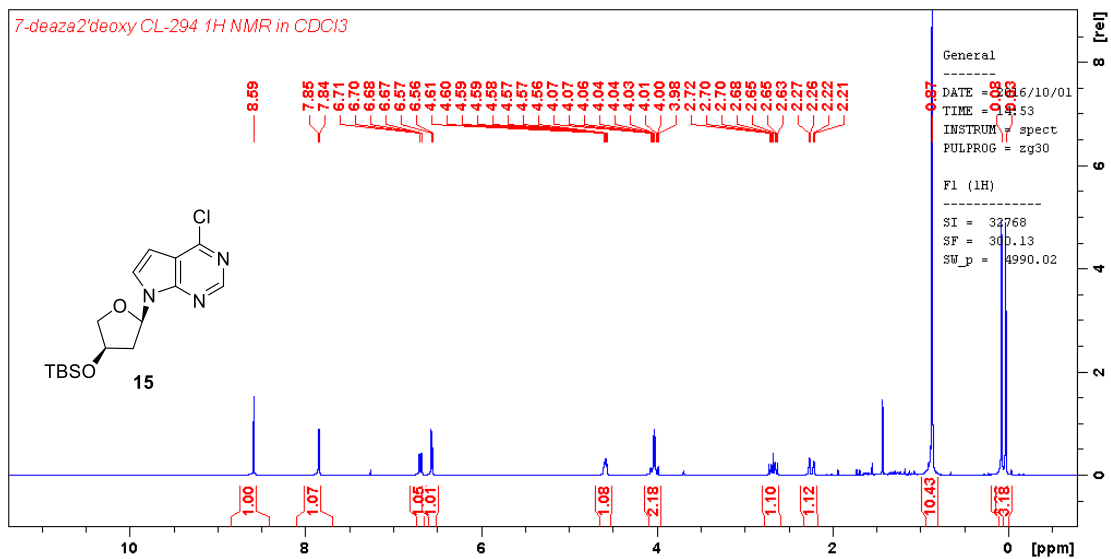

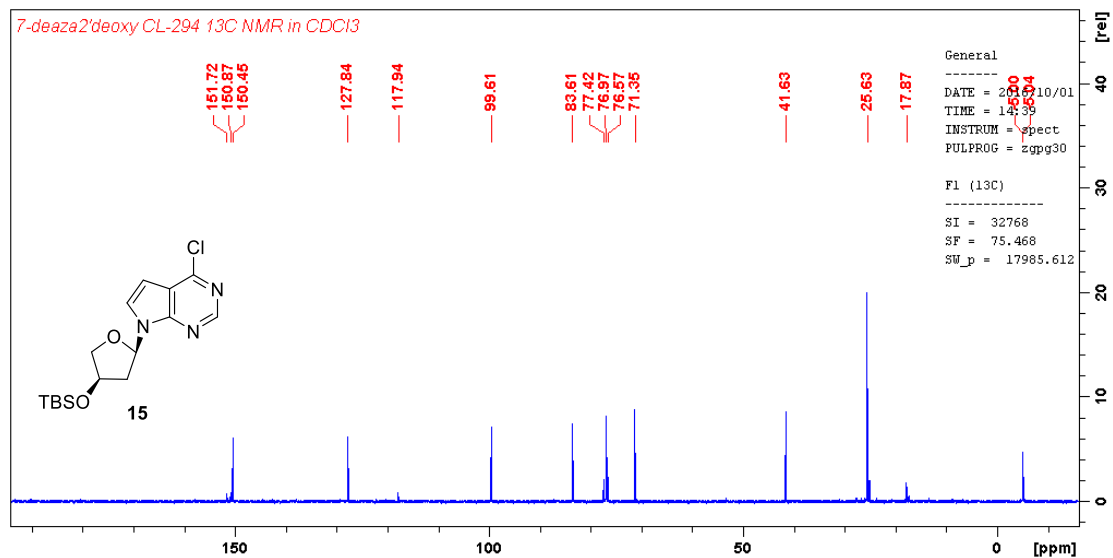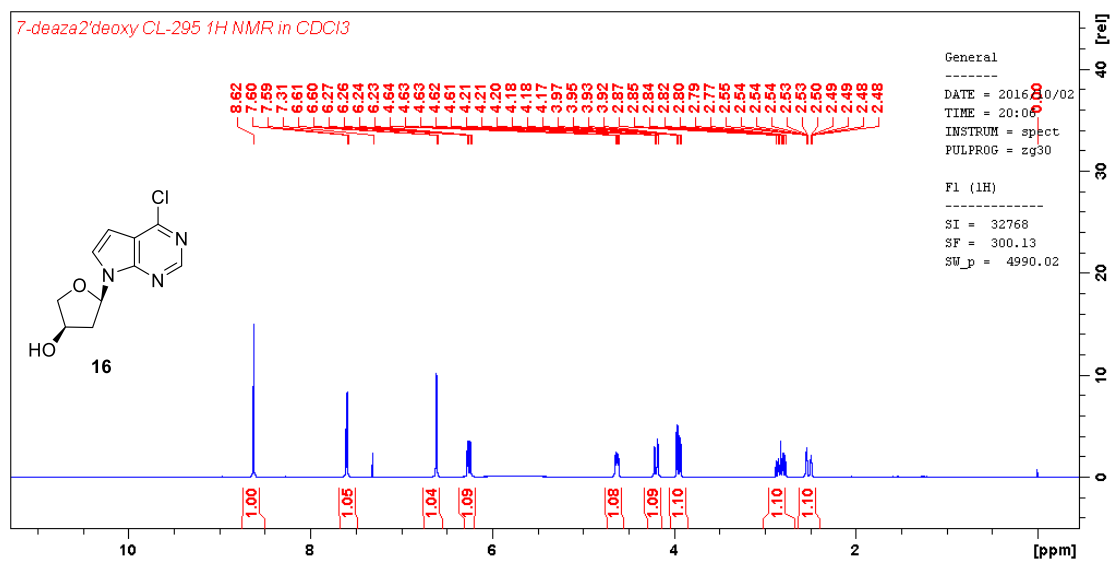

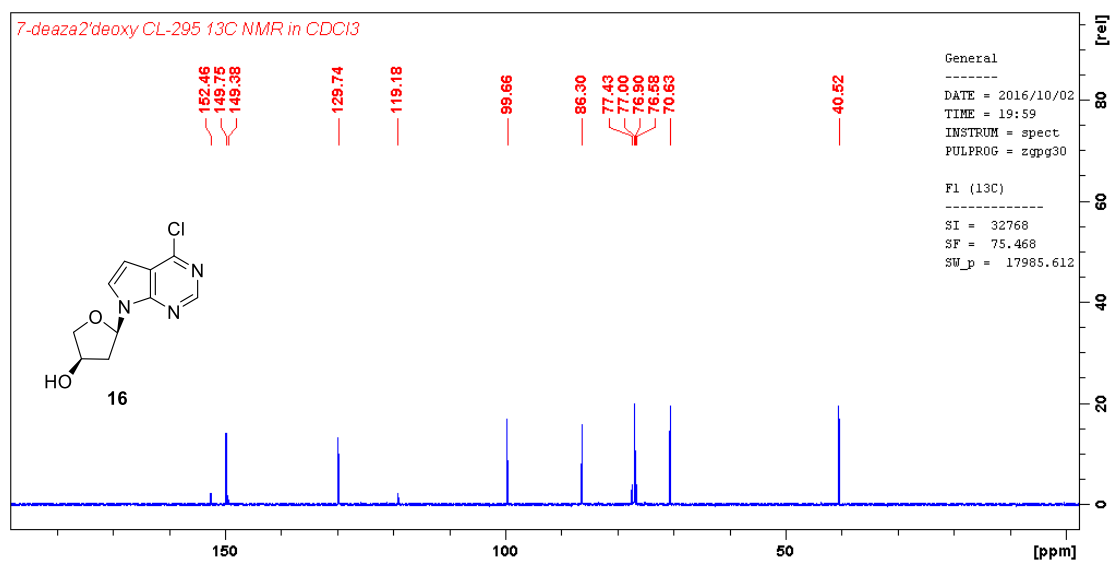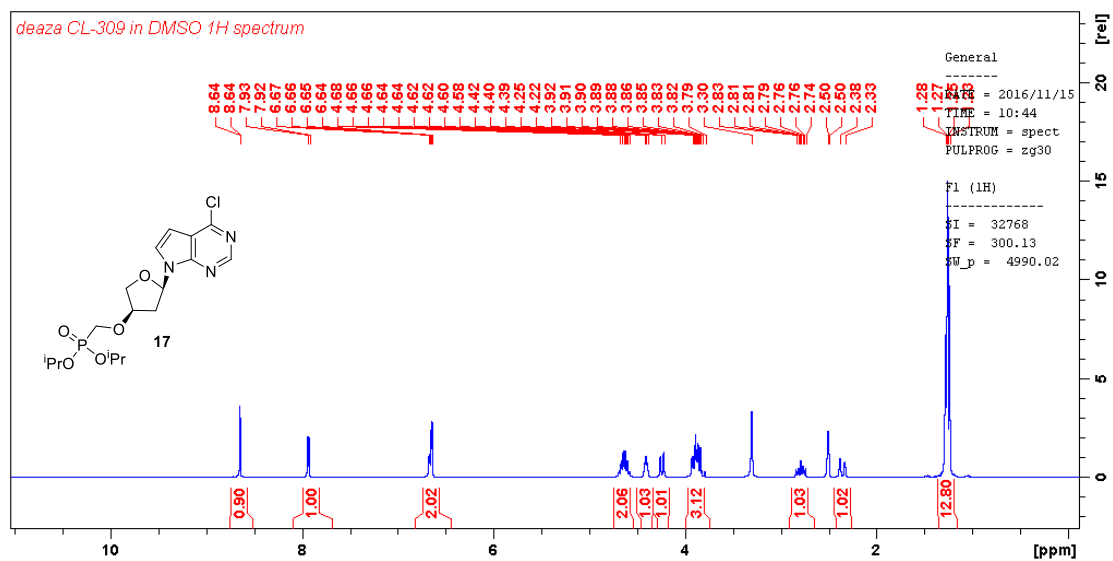

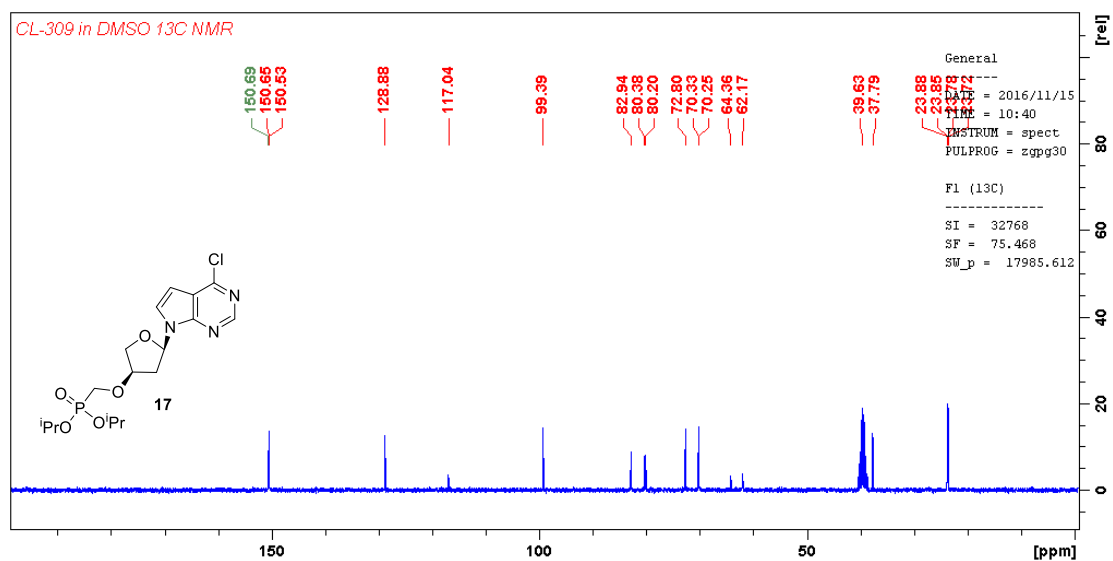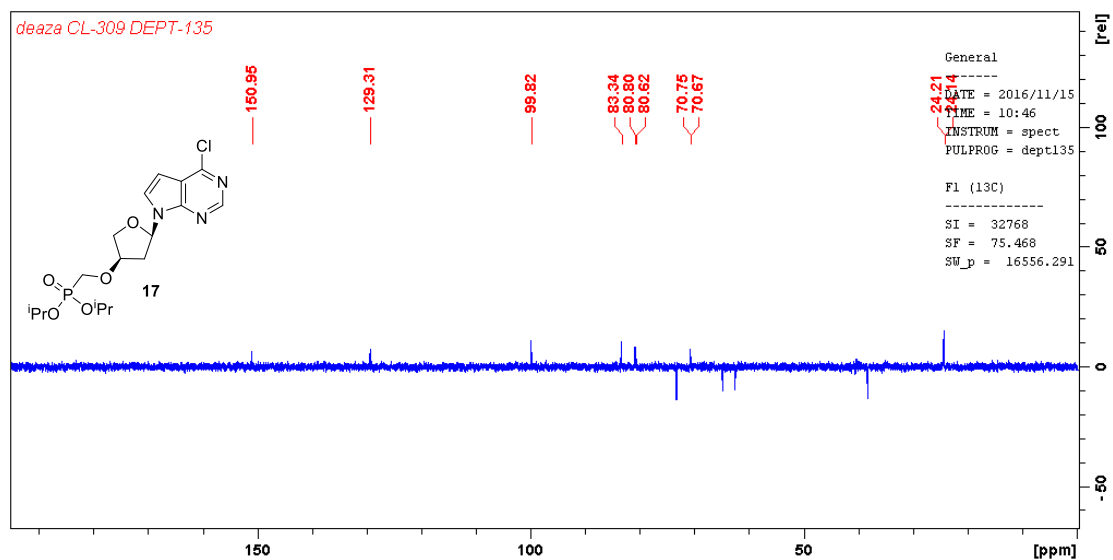





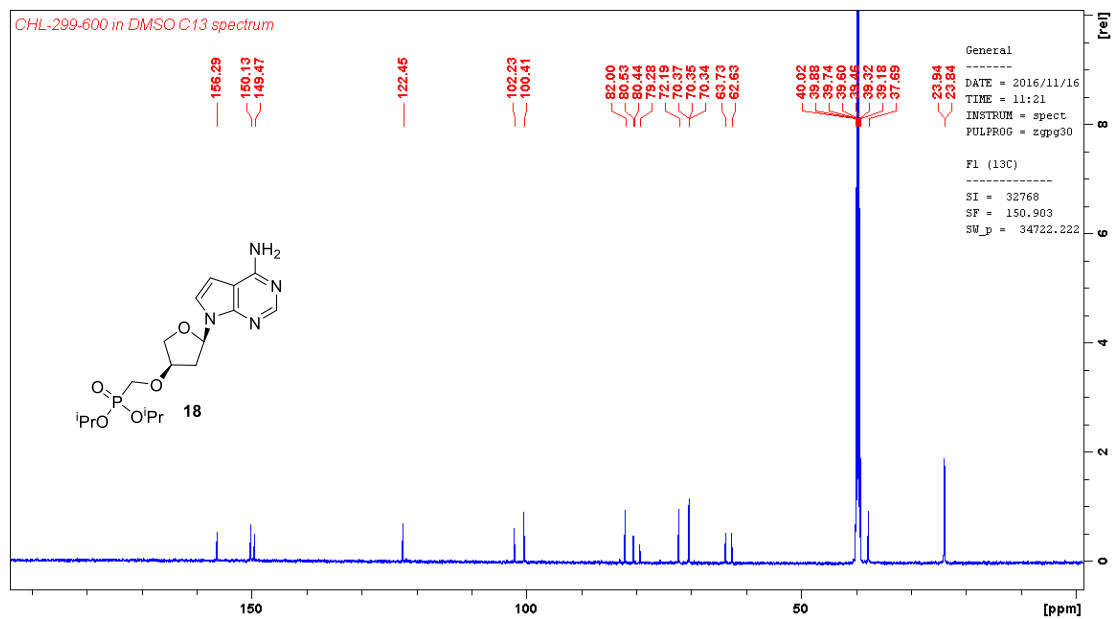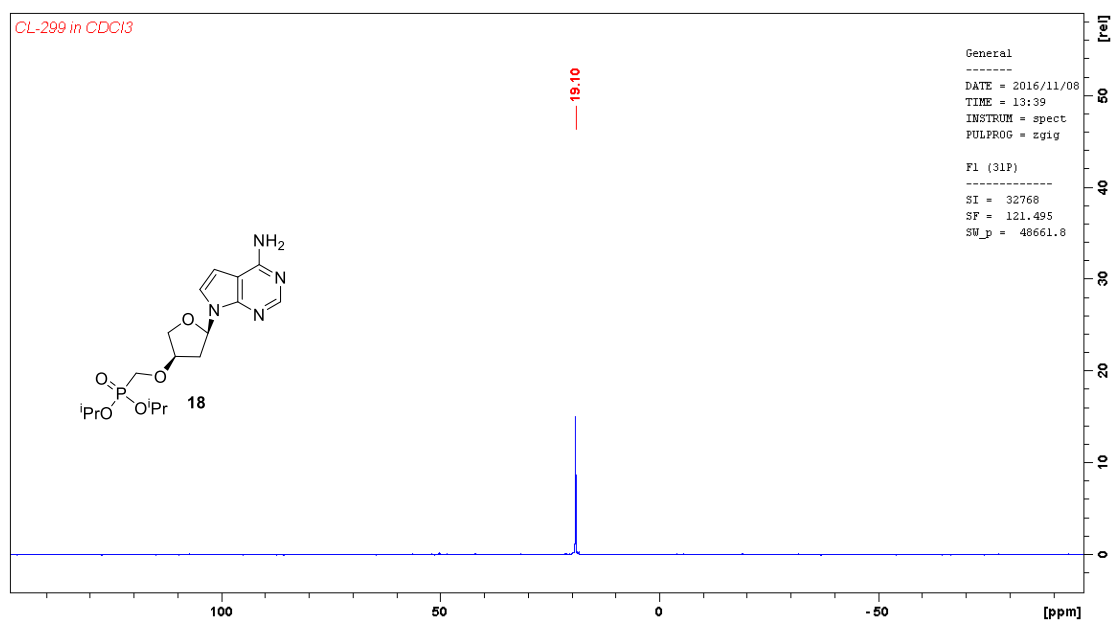

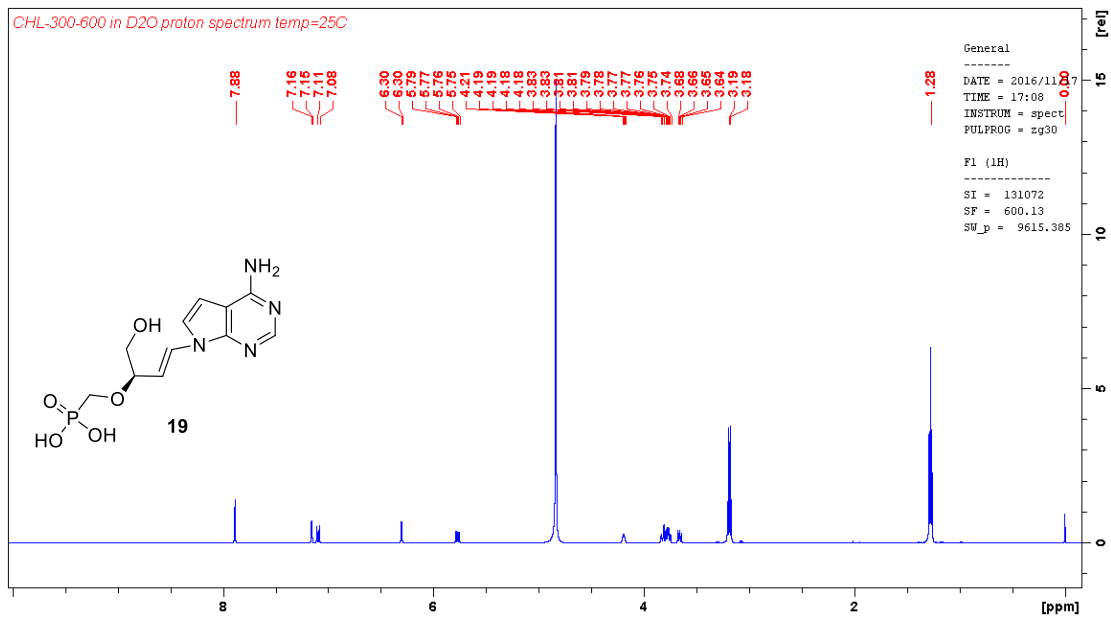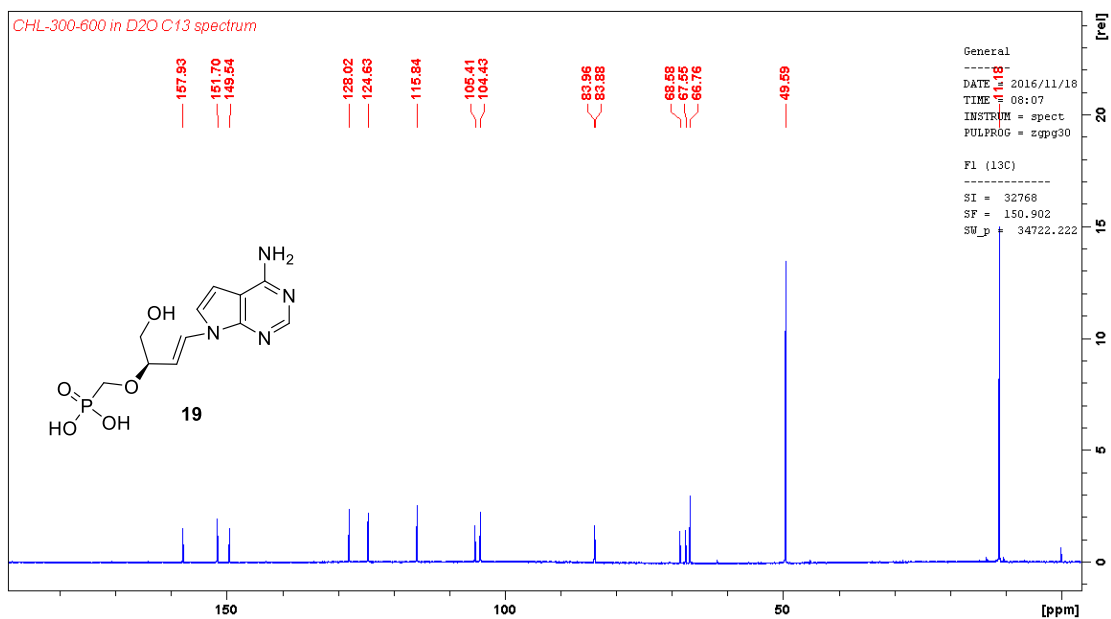

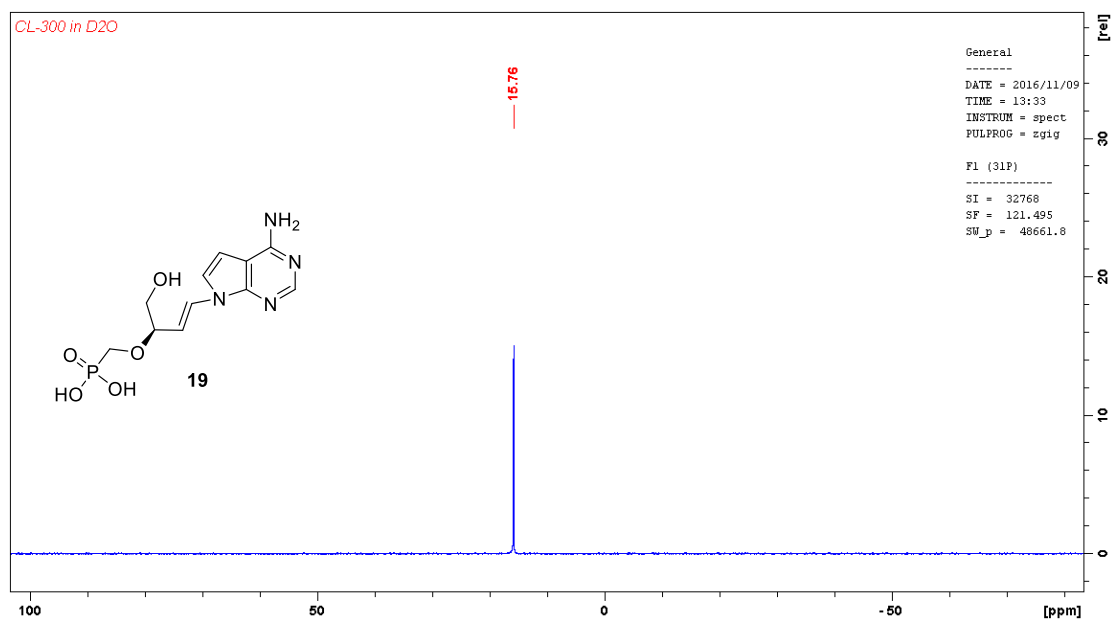

## 2D NMR Spectra of 19

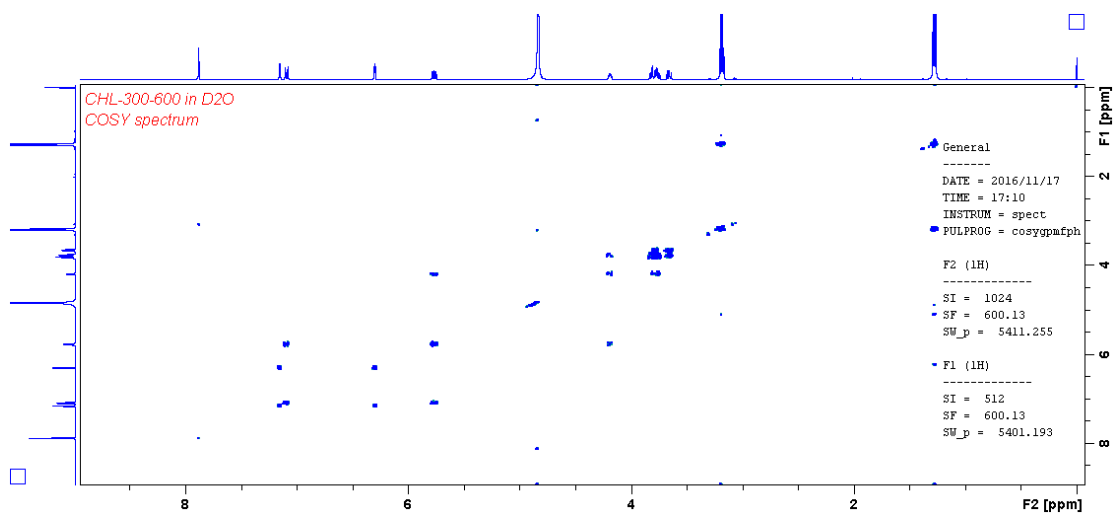

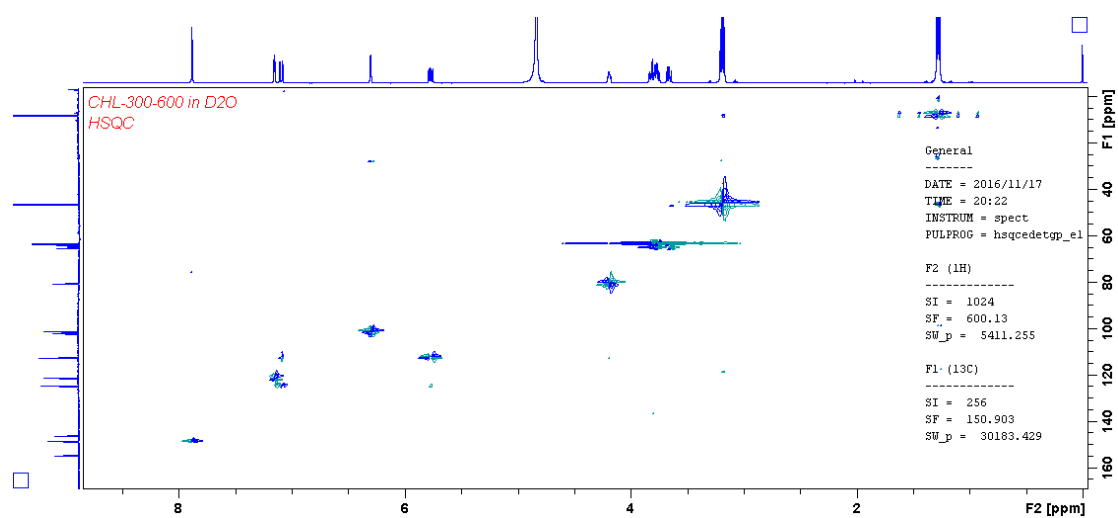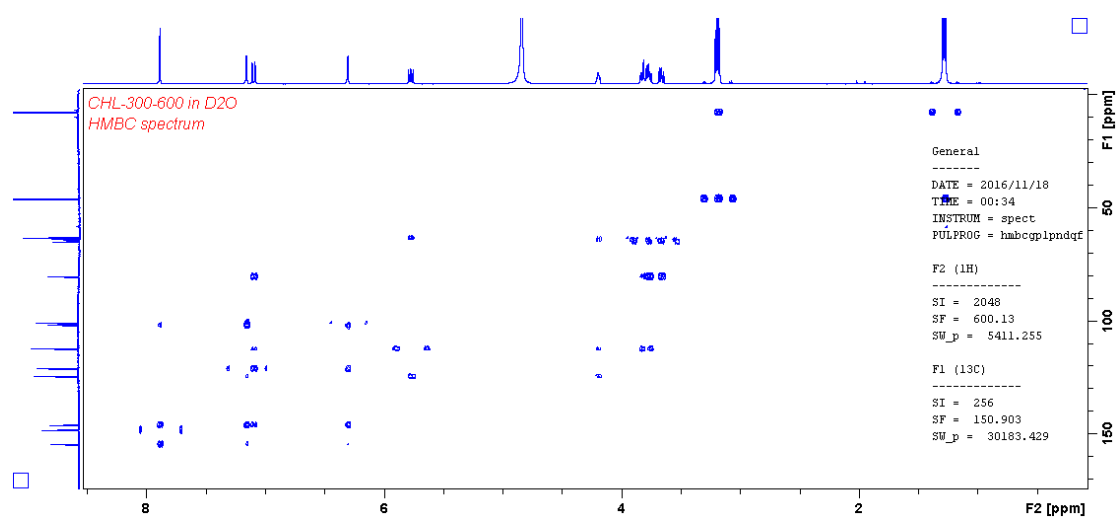

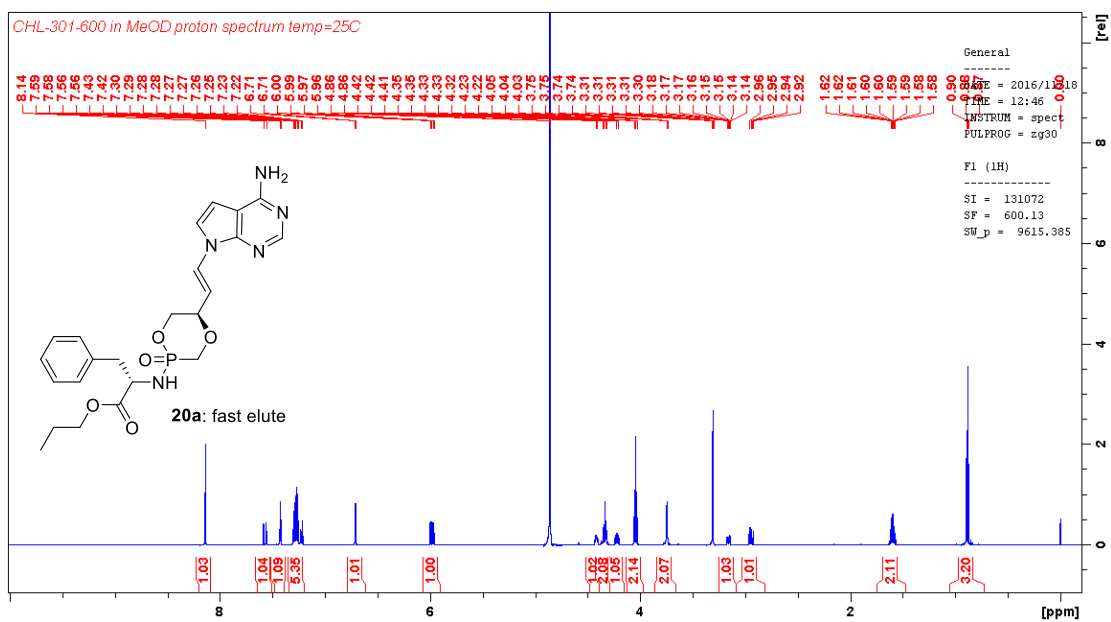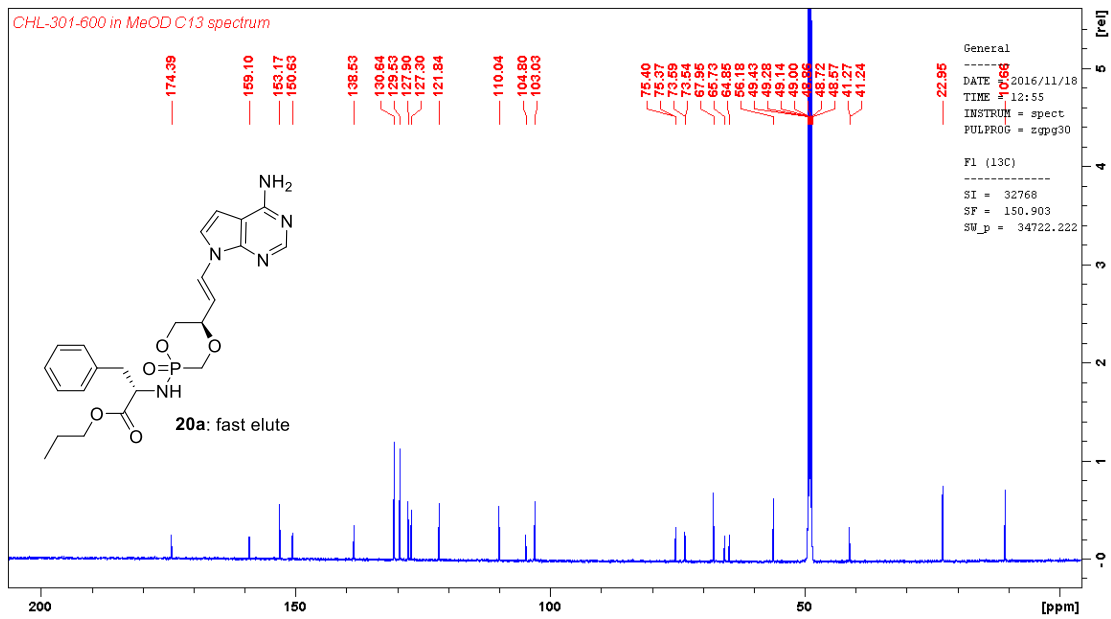

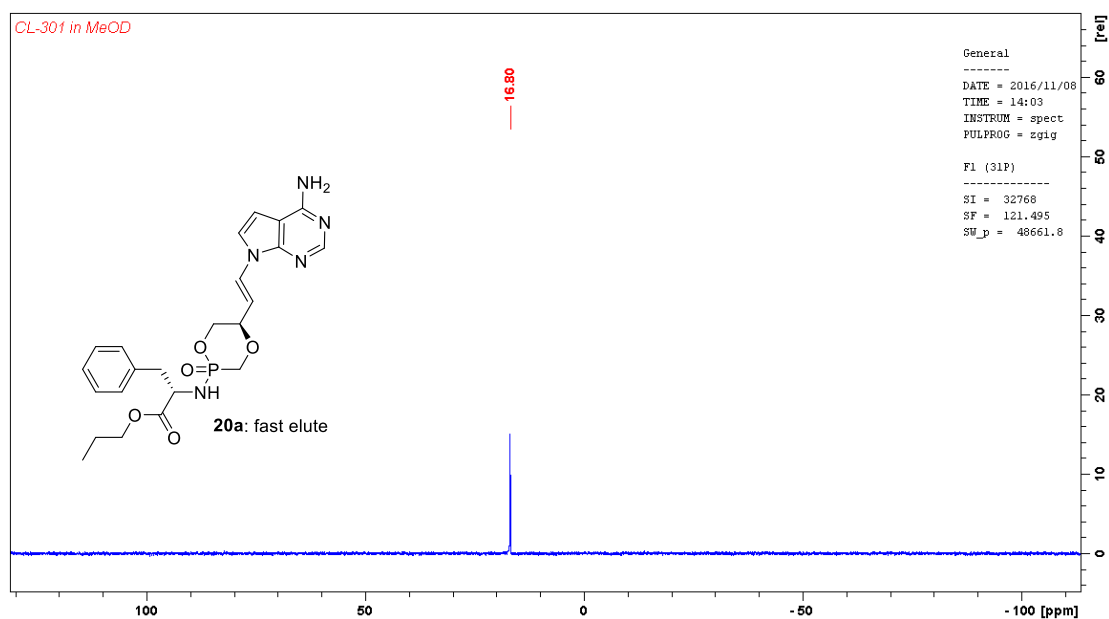

## 2D NMR spectra of 20a

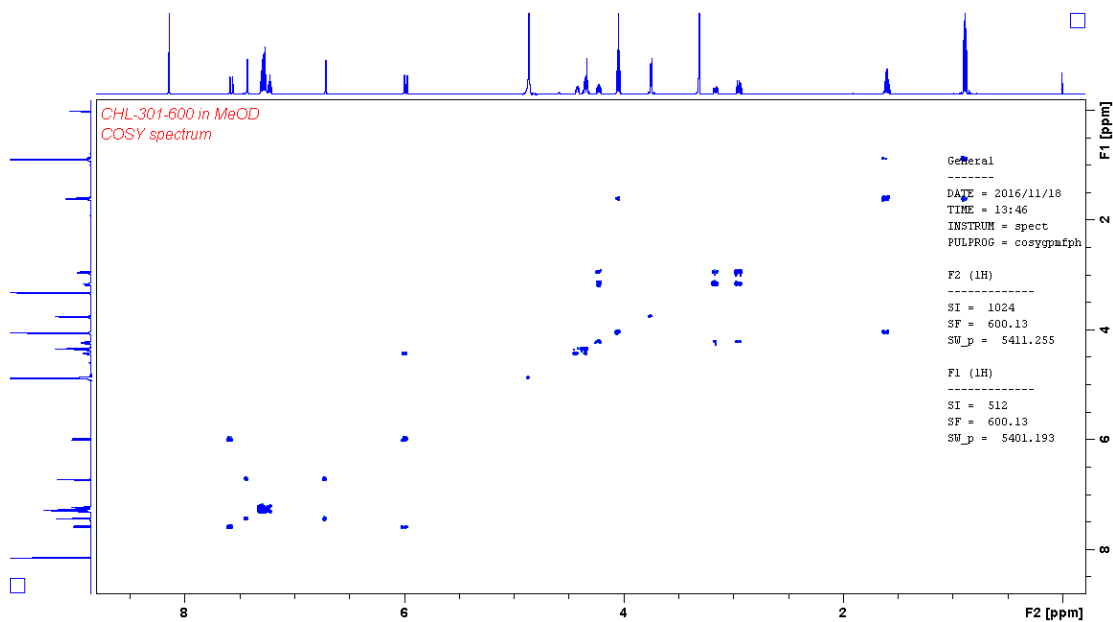

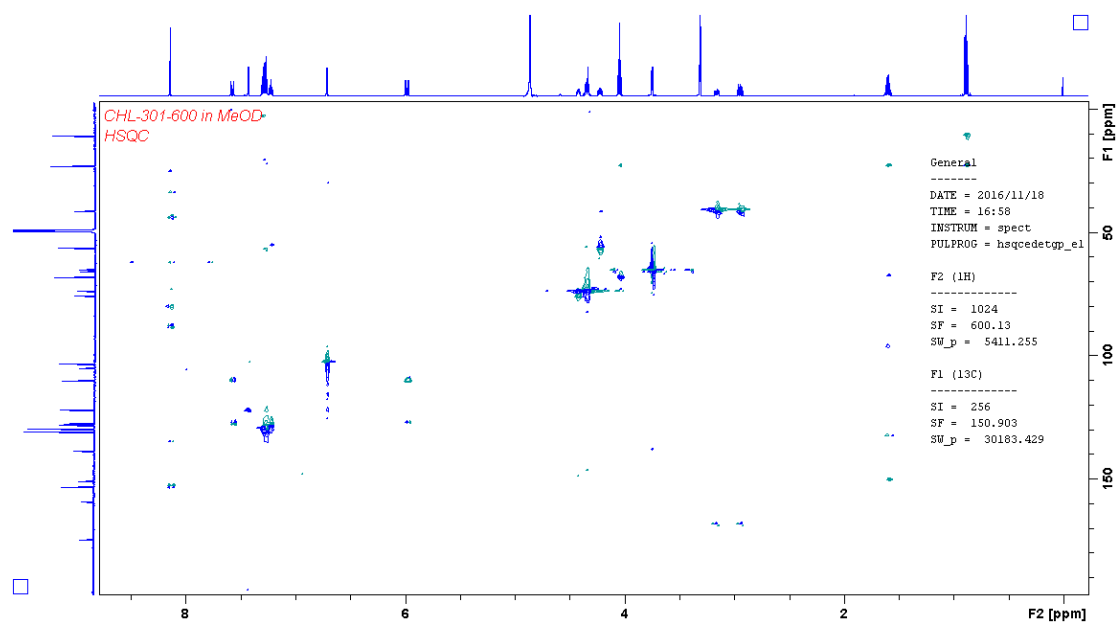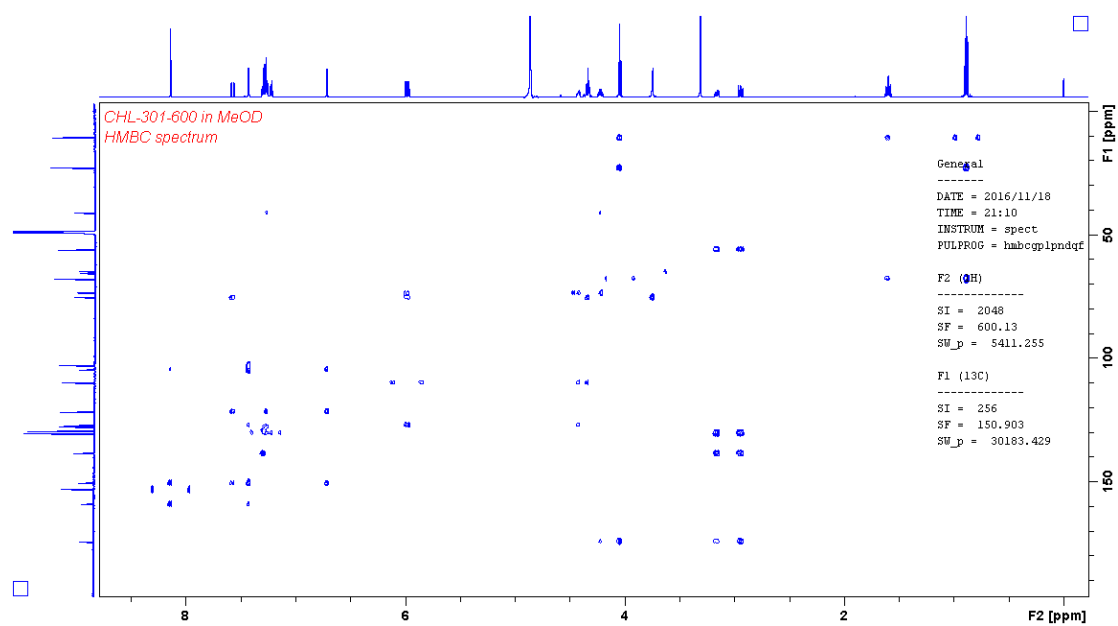

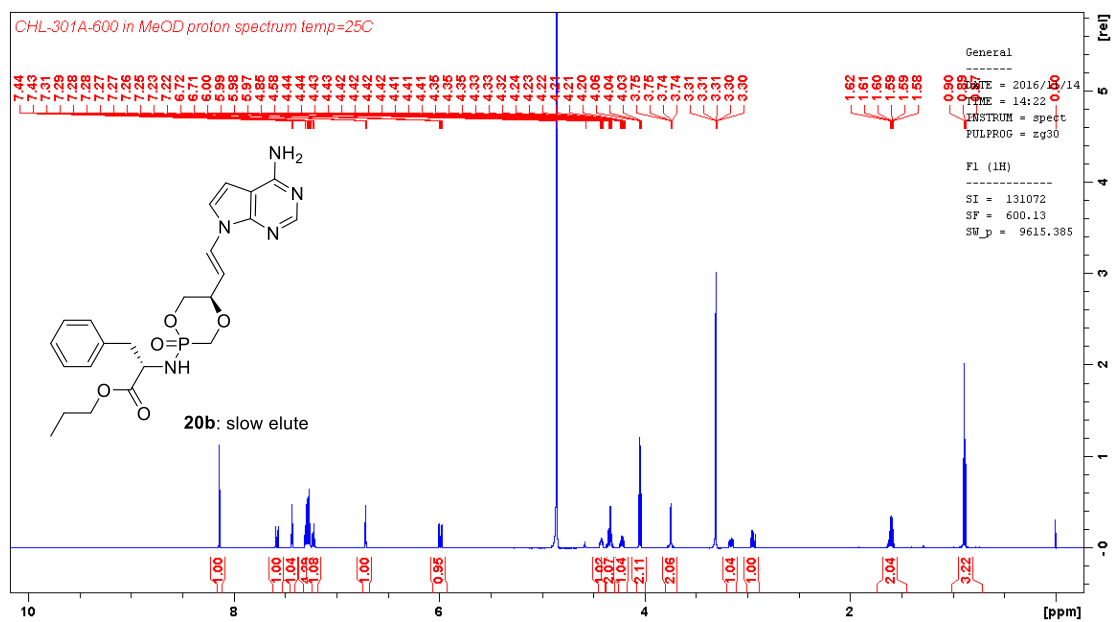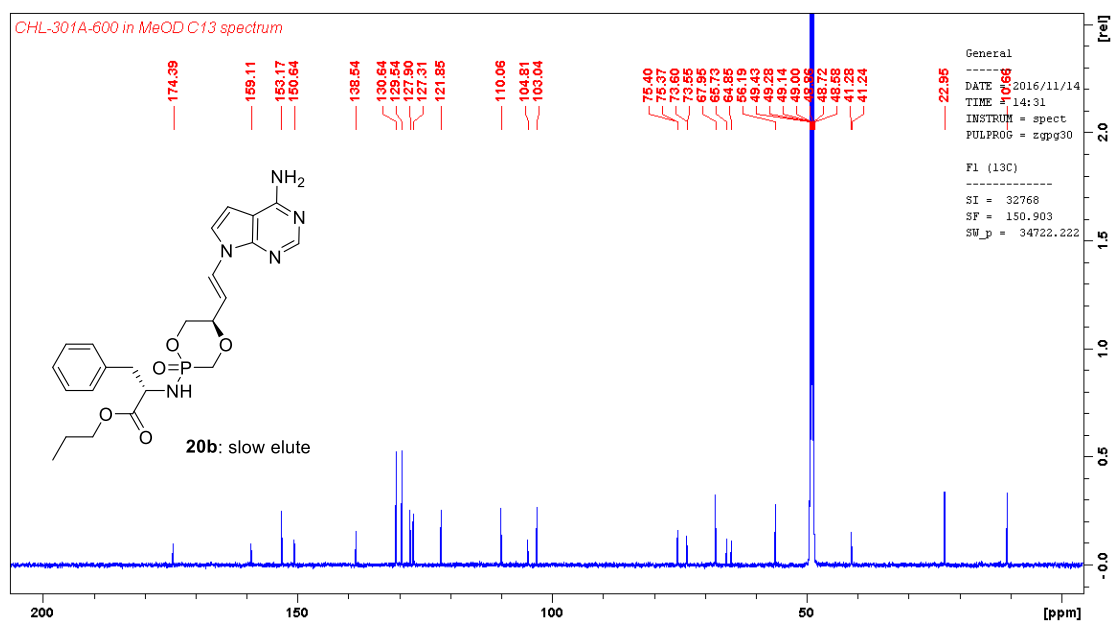



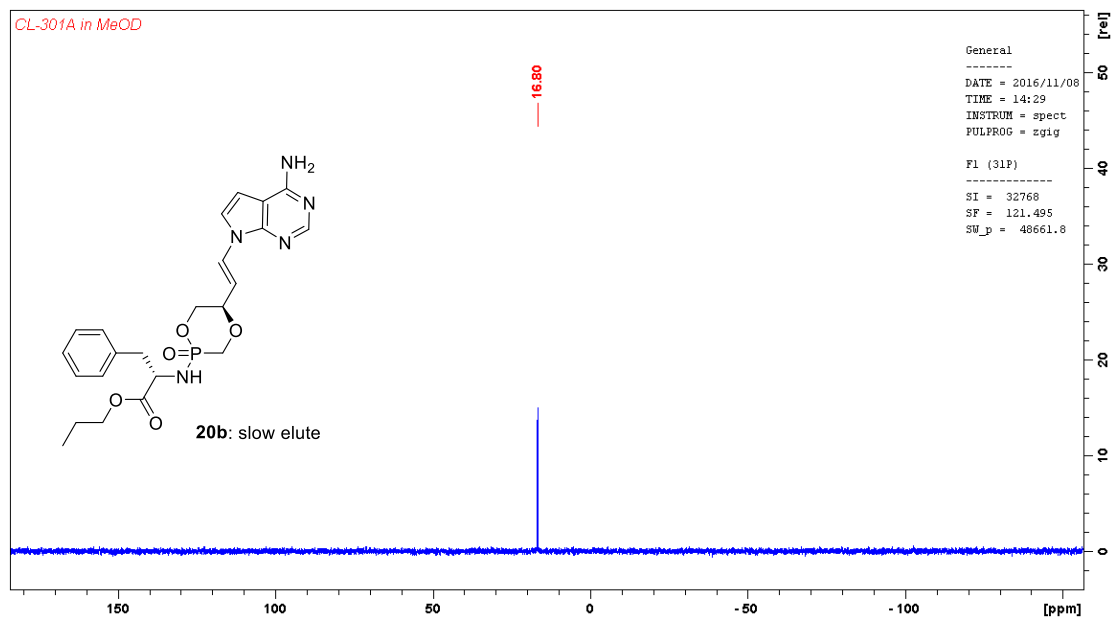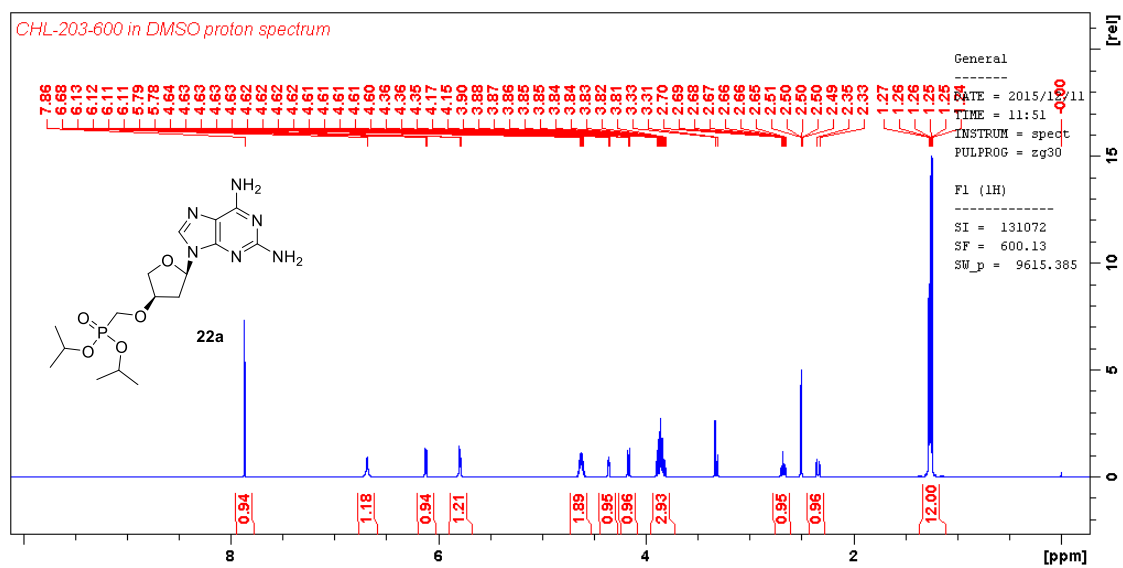

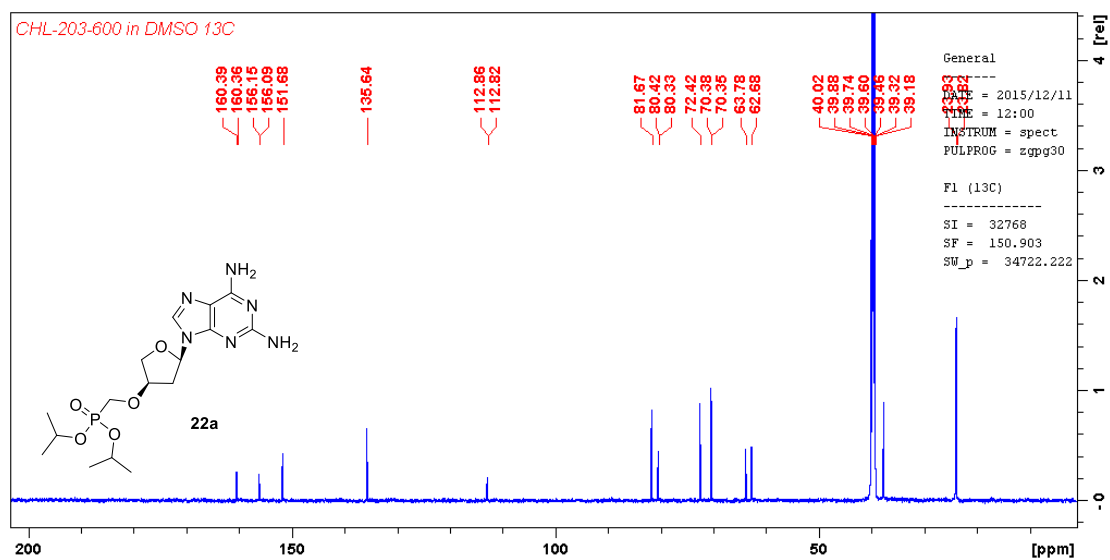

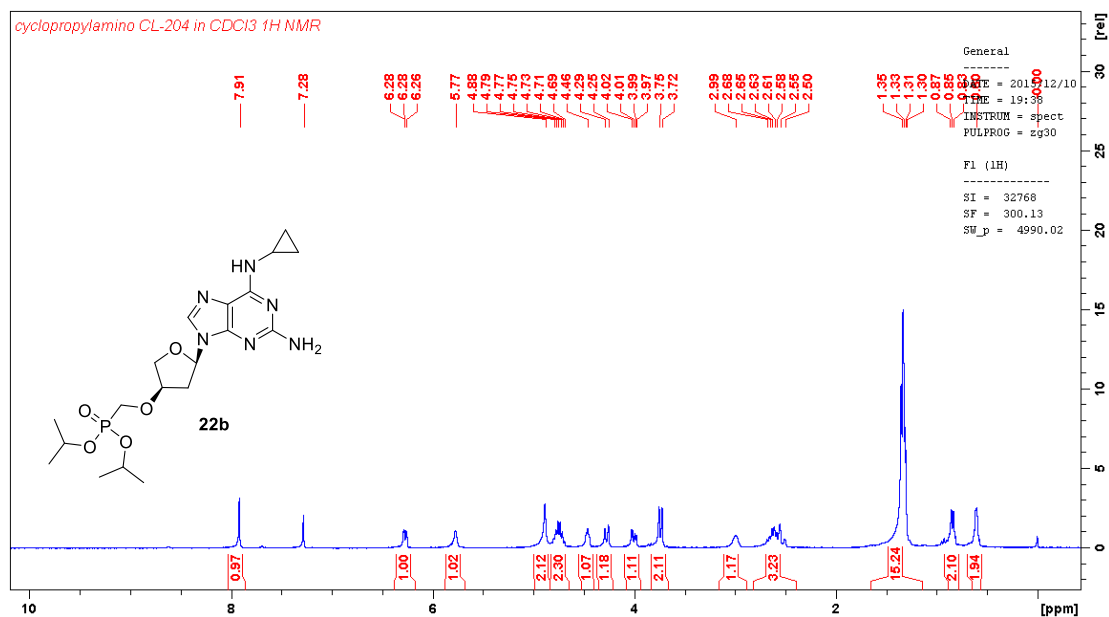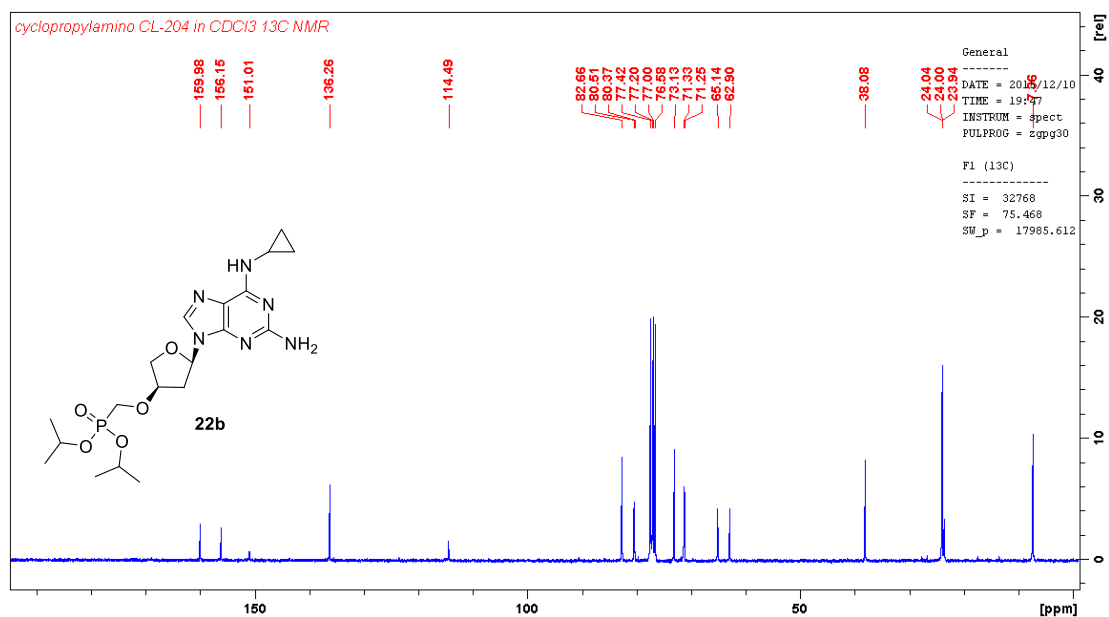

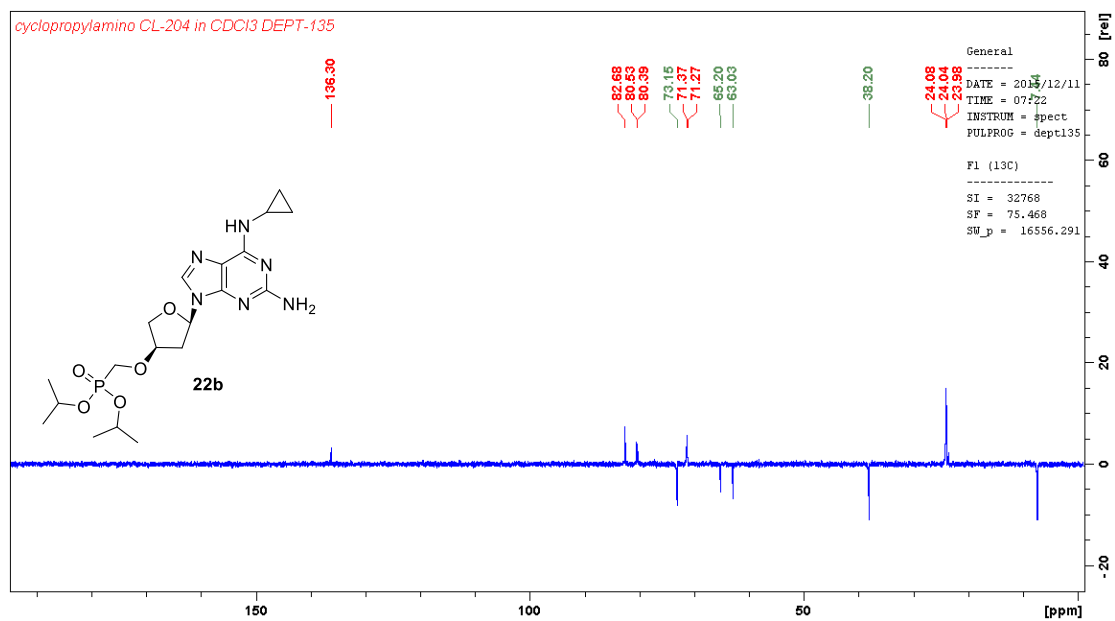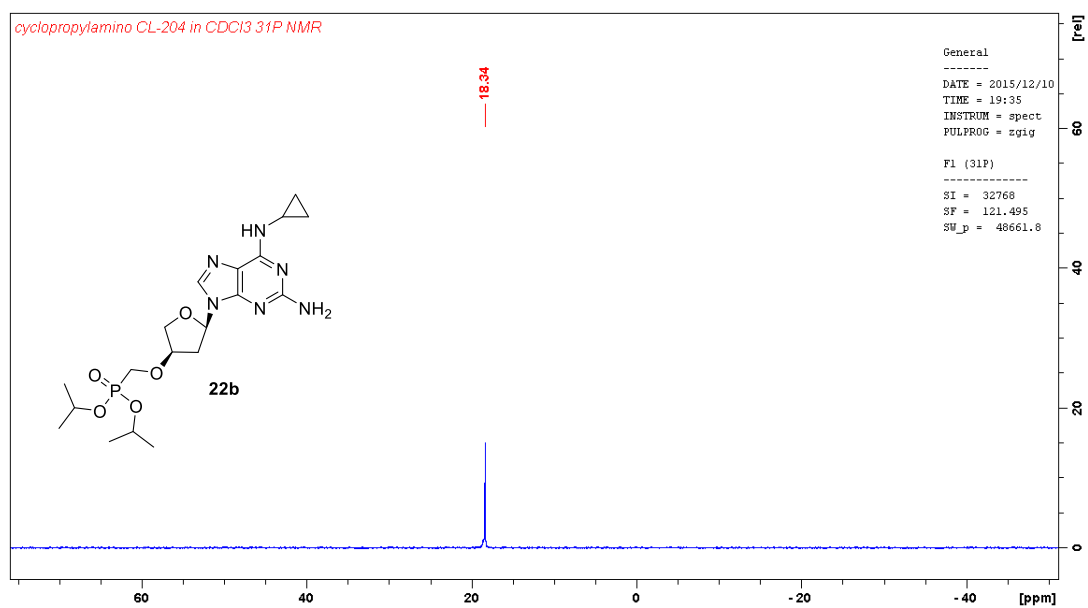

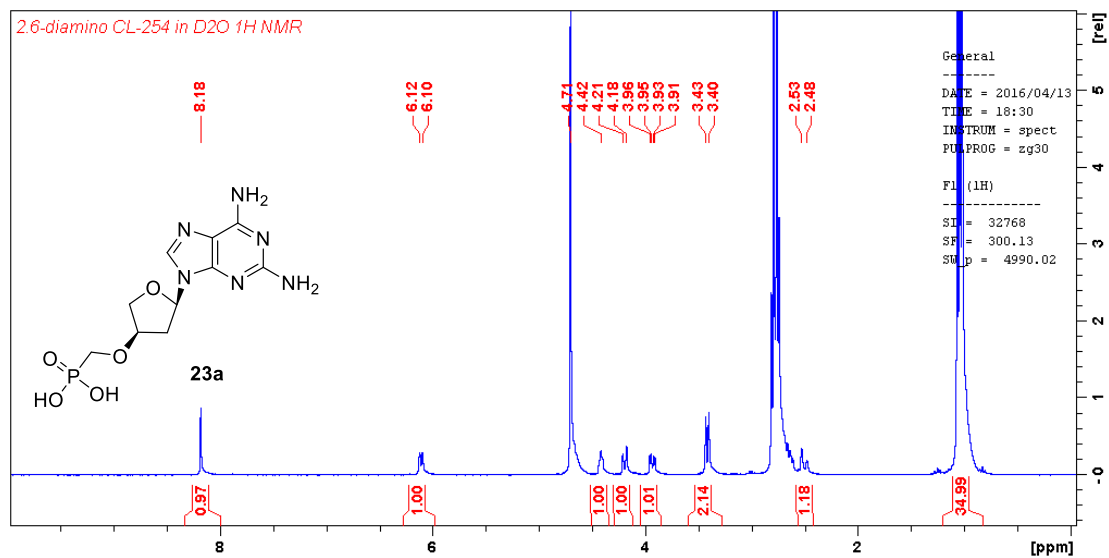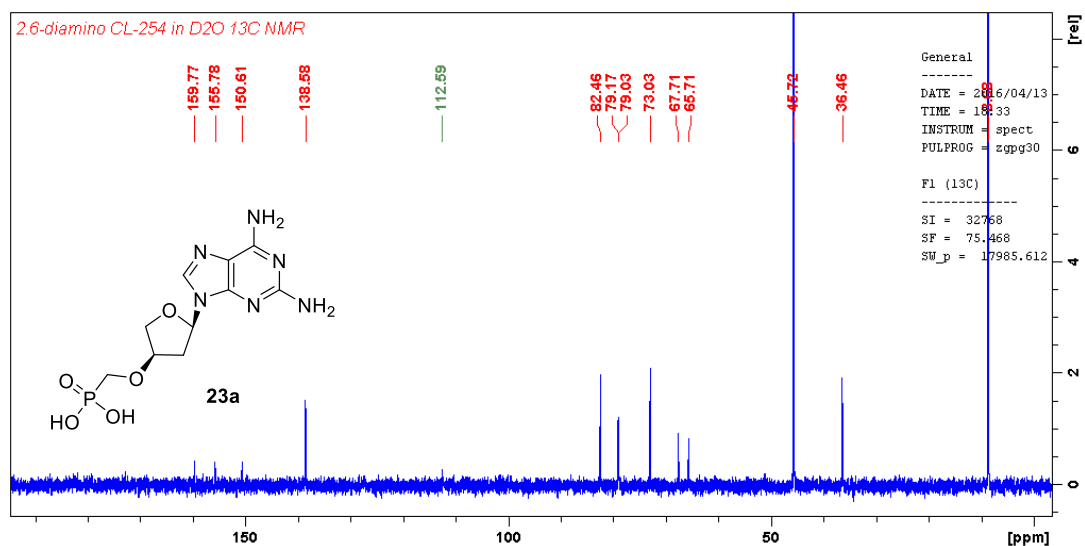

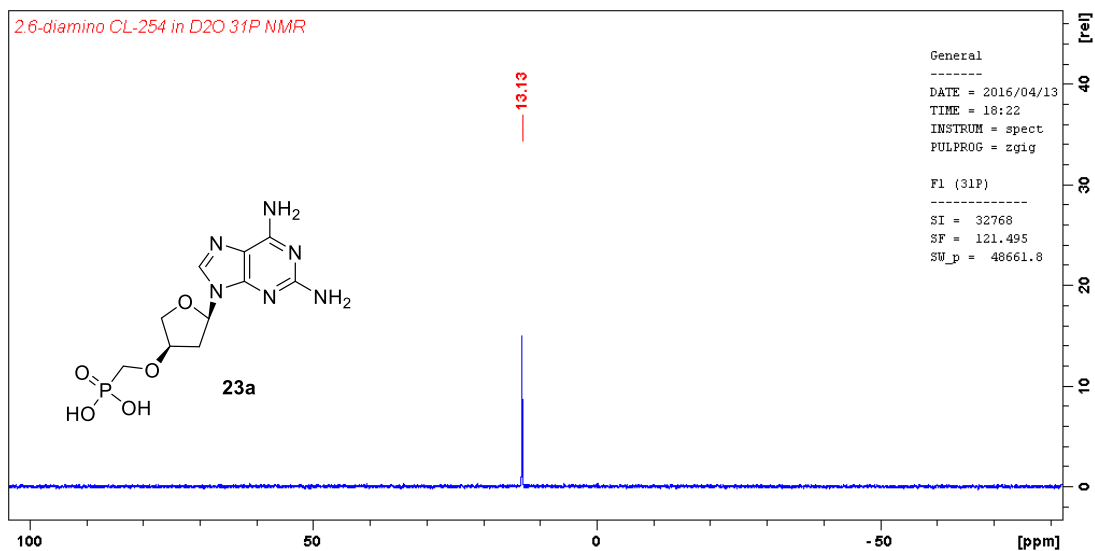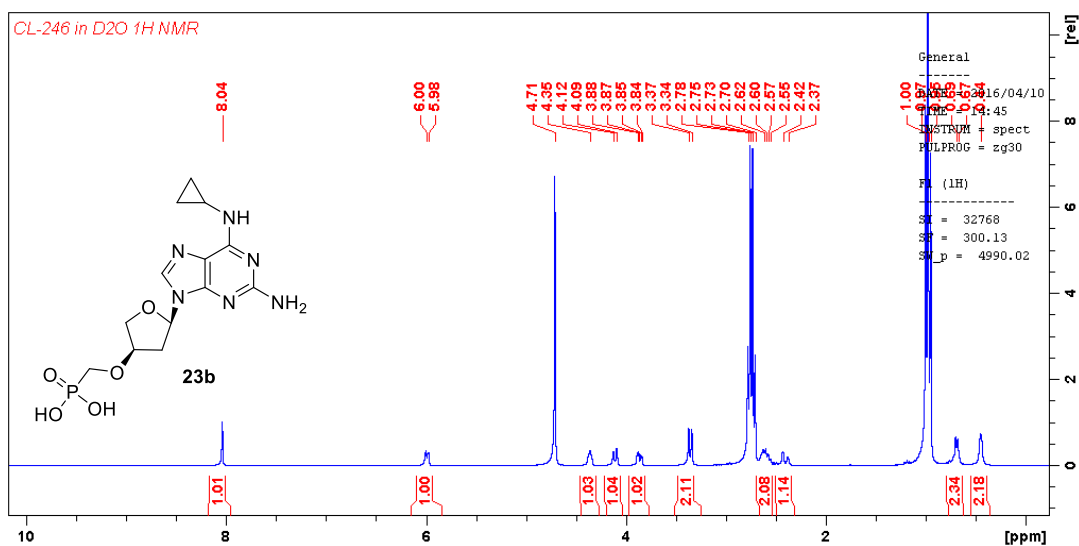

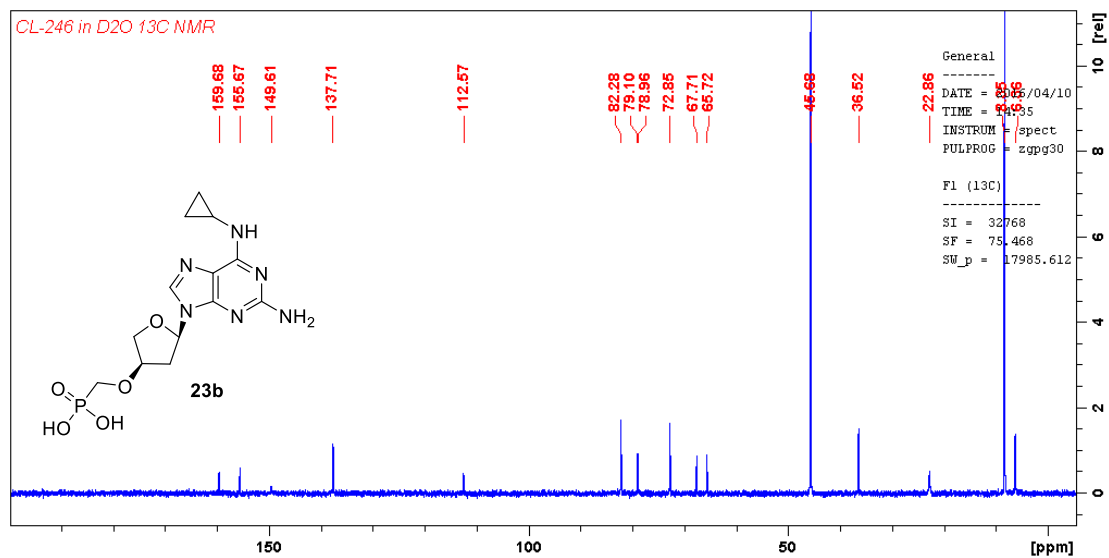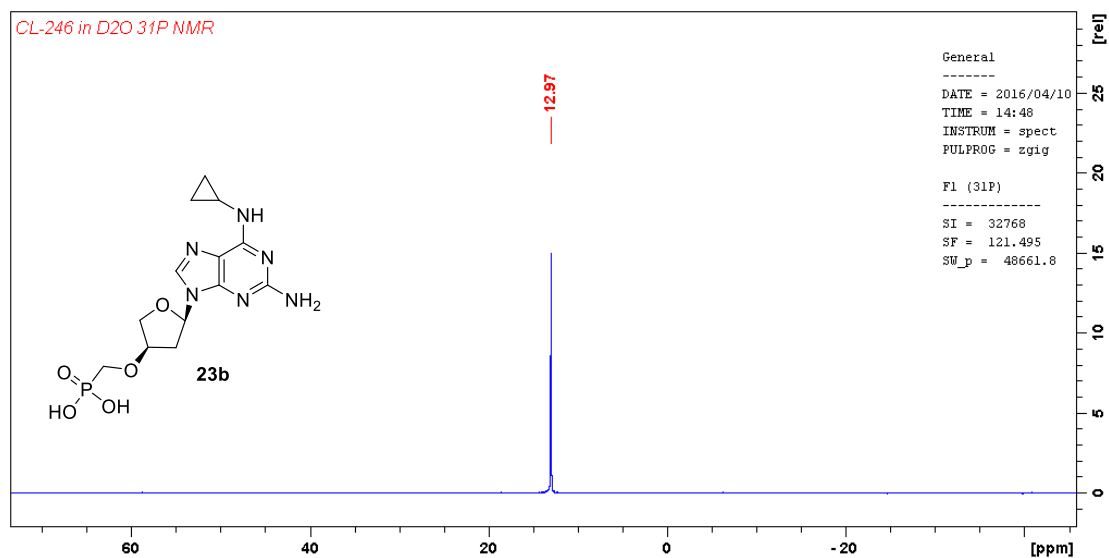

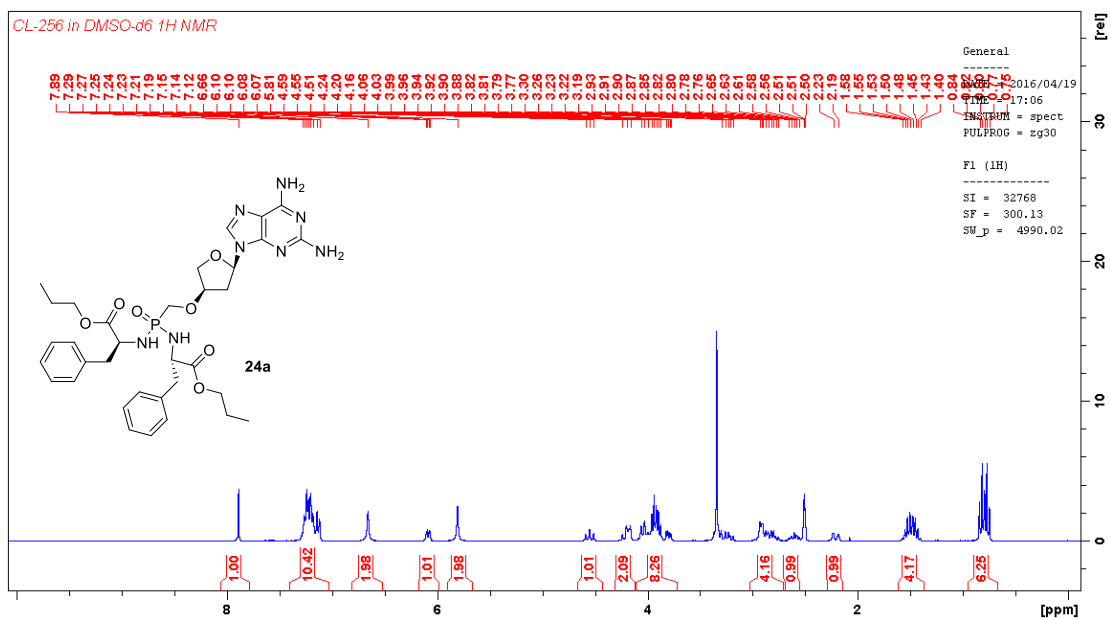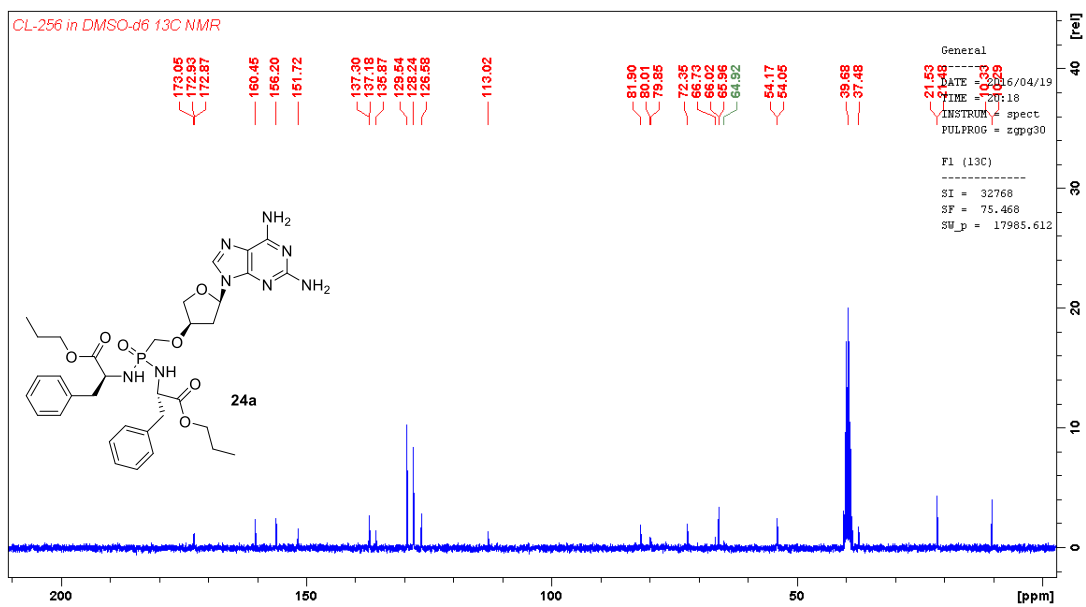



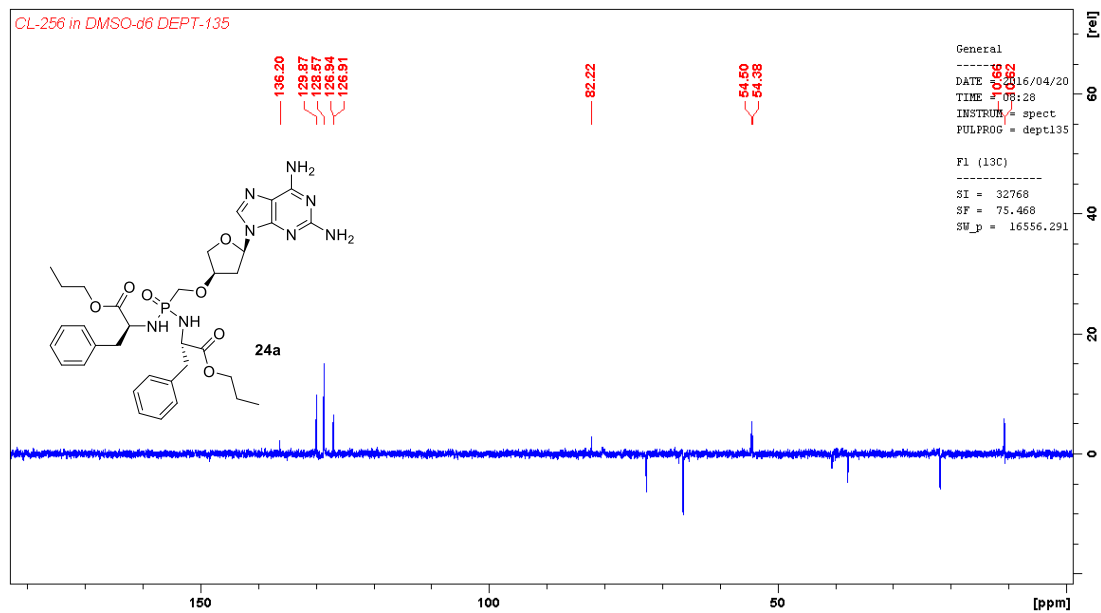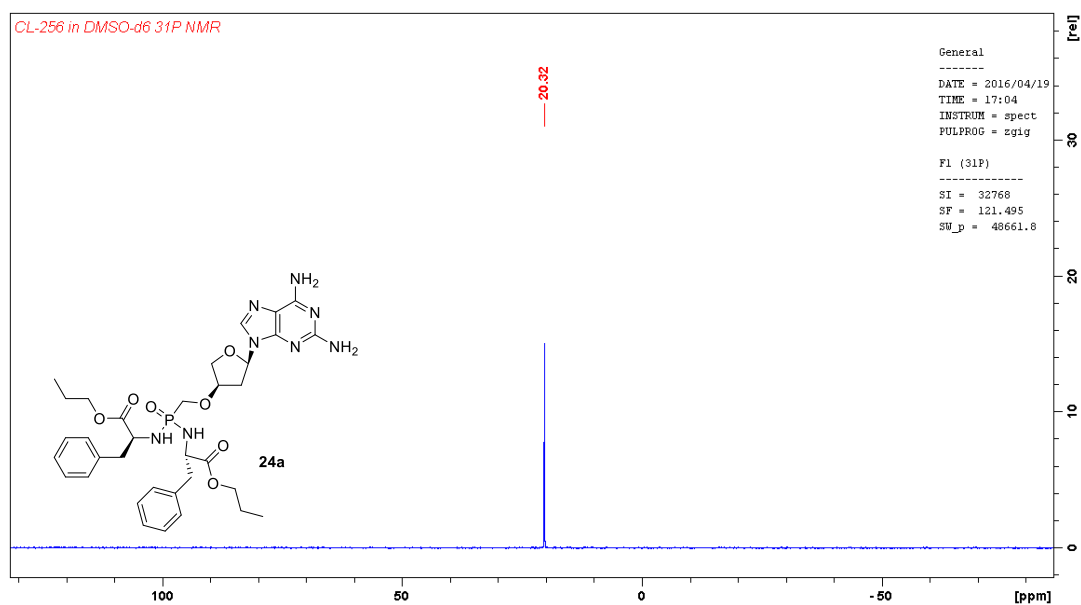

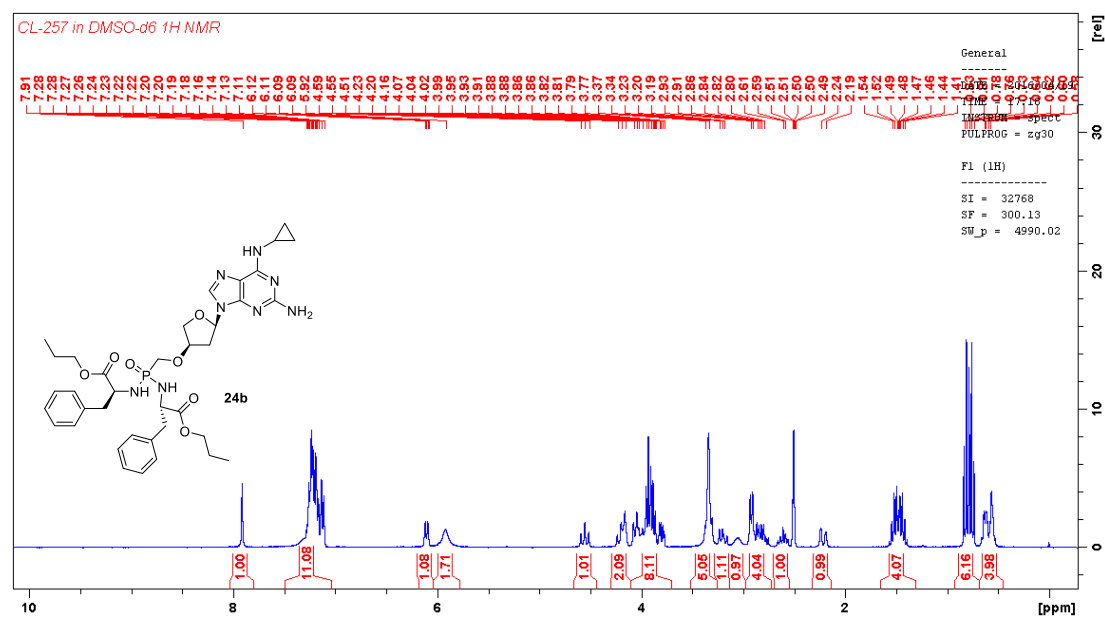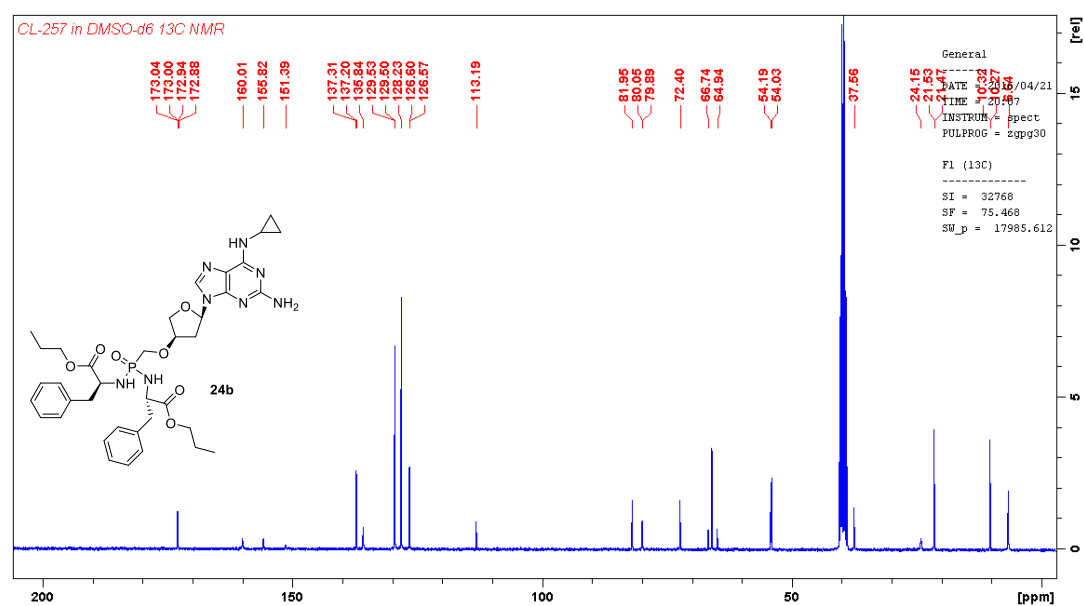

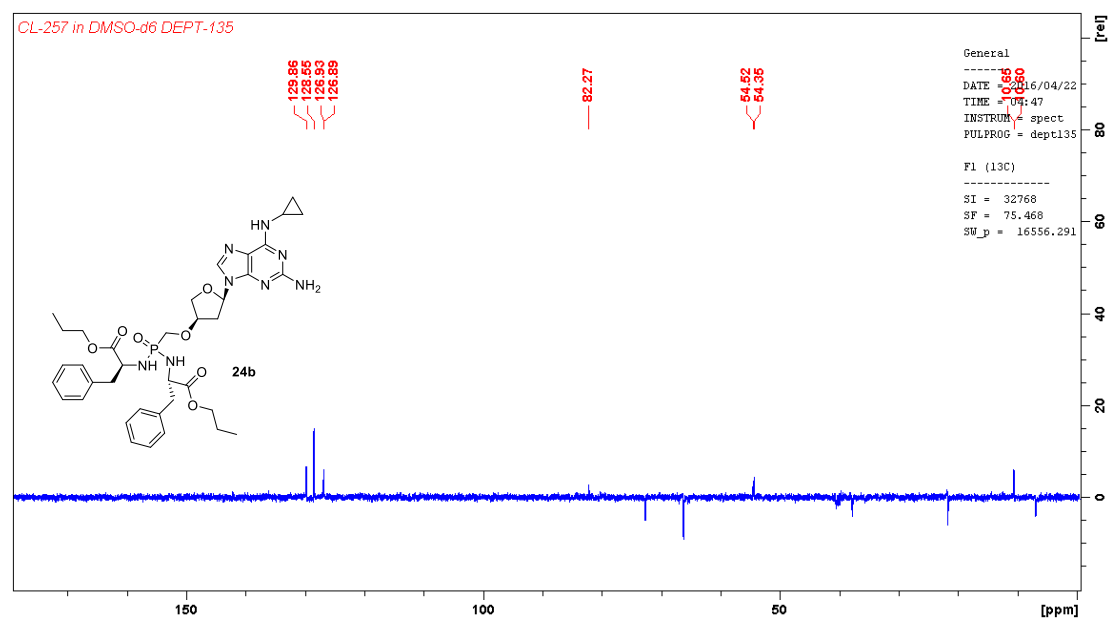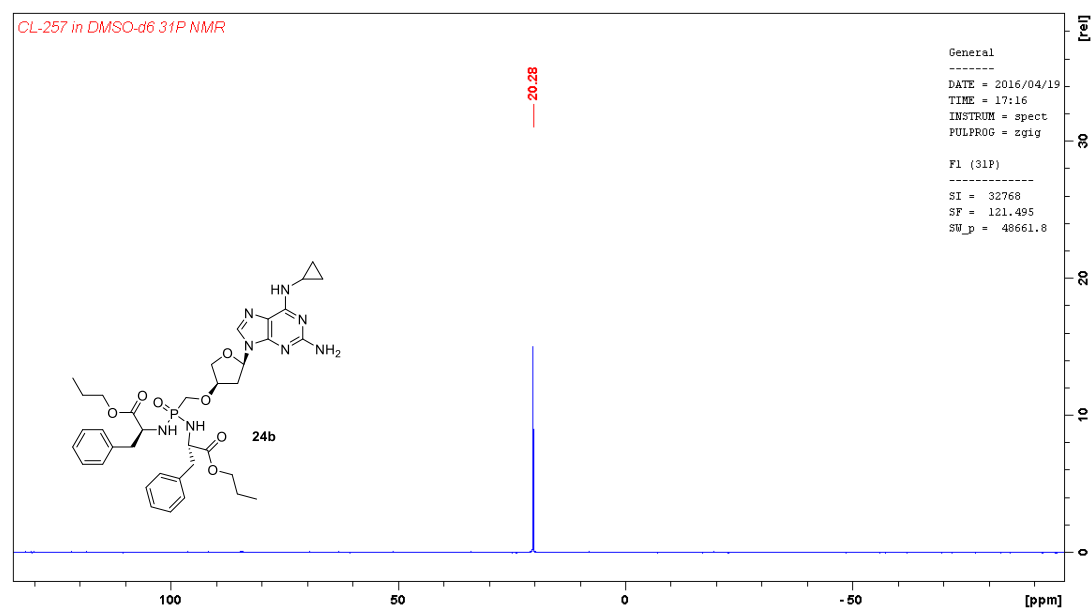



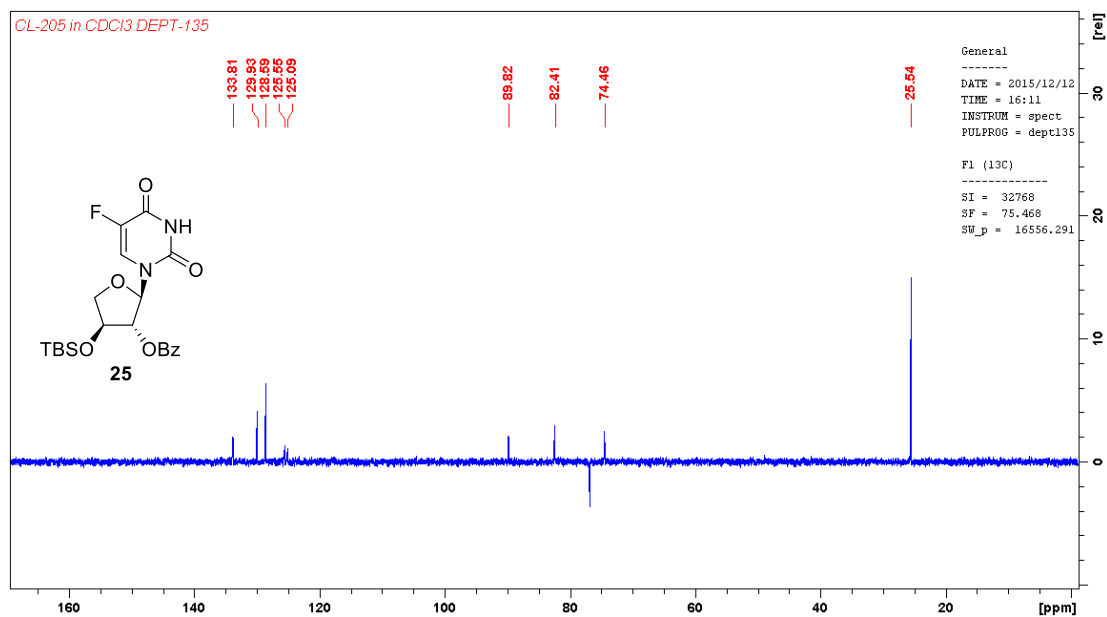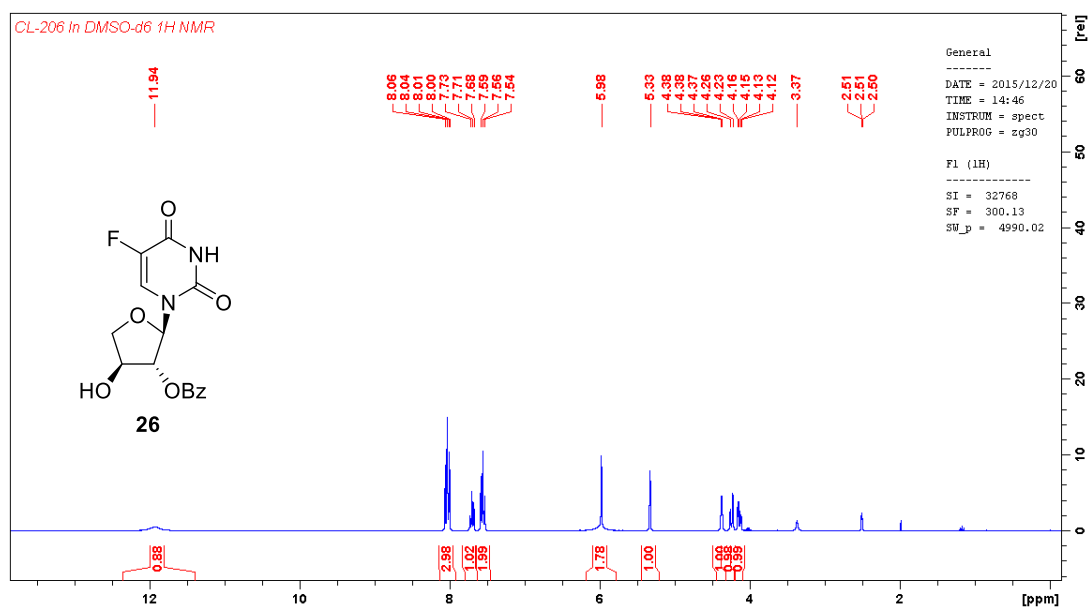

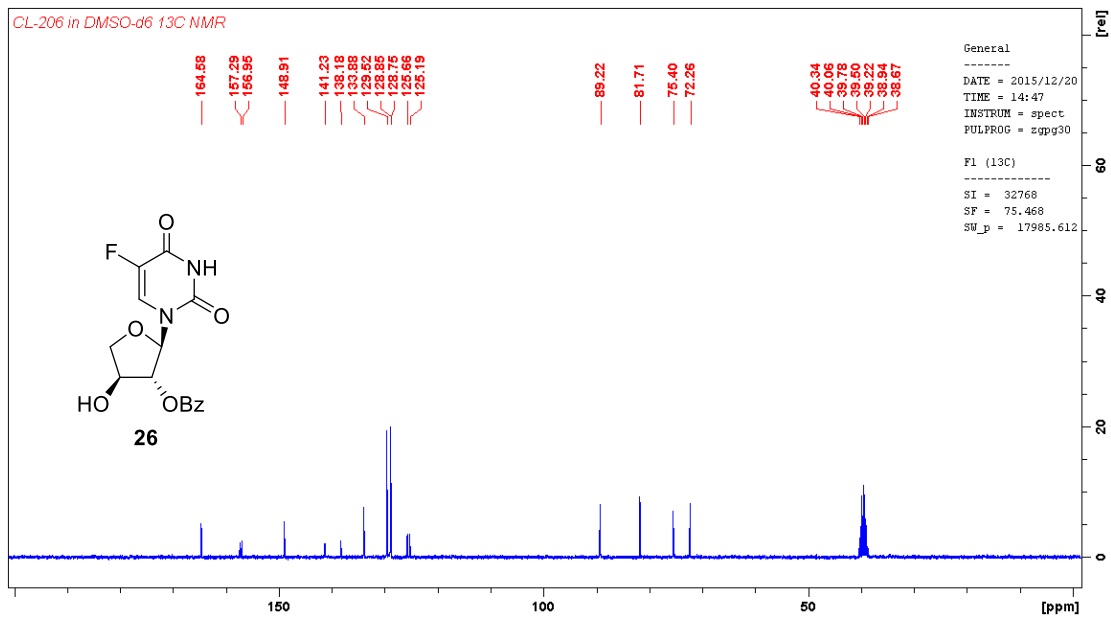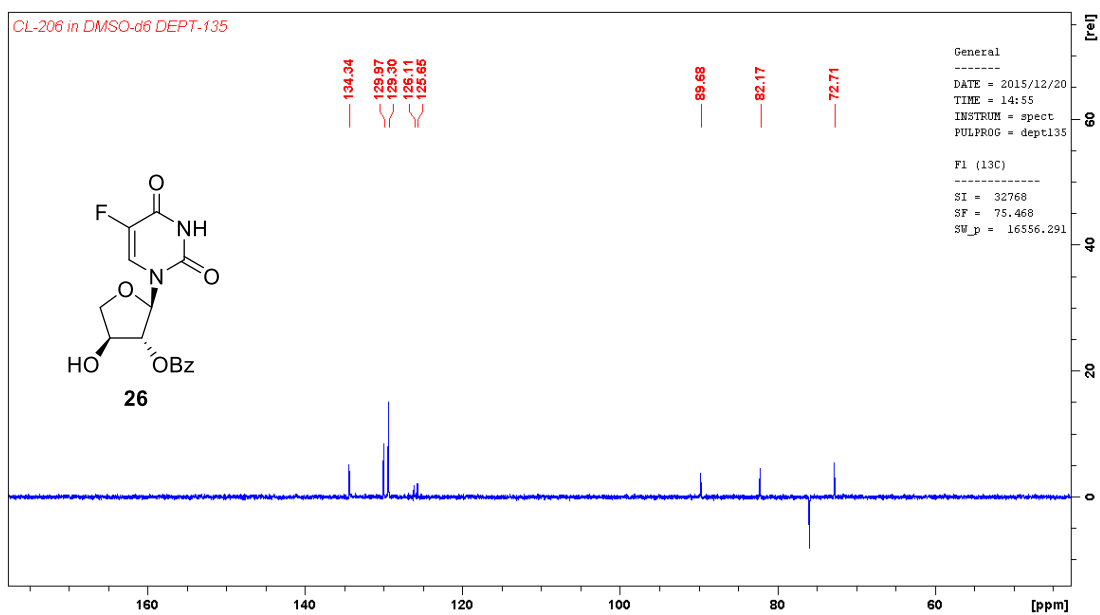

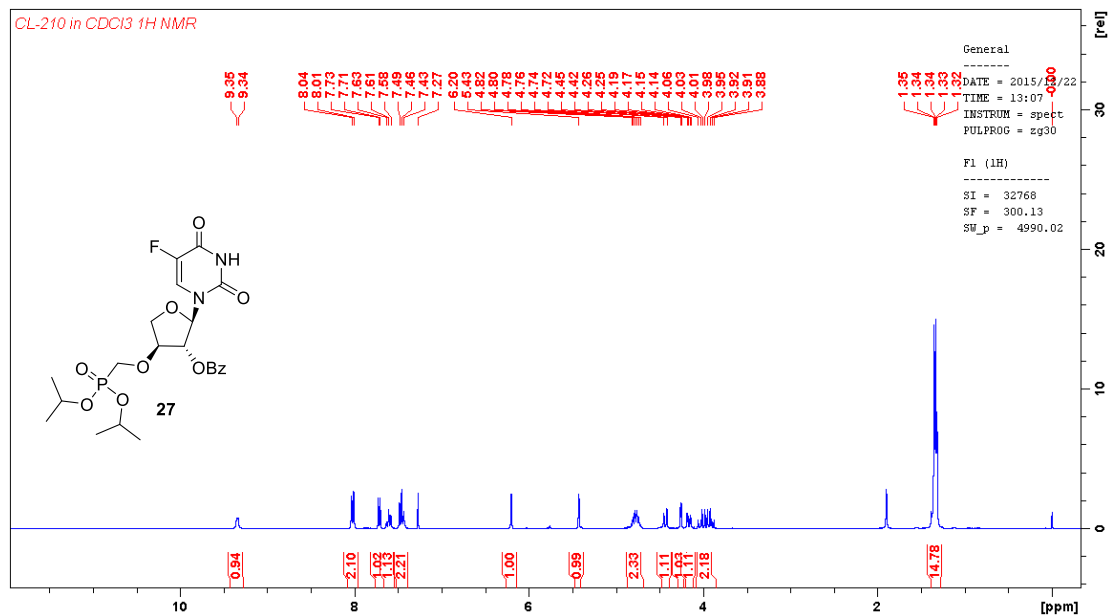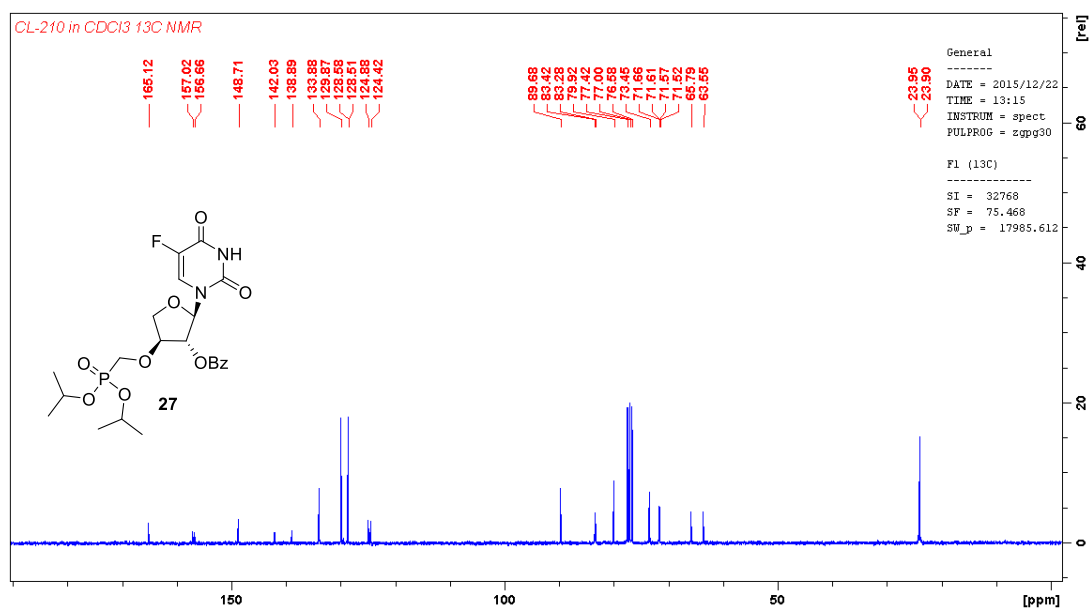

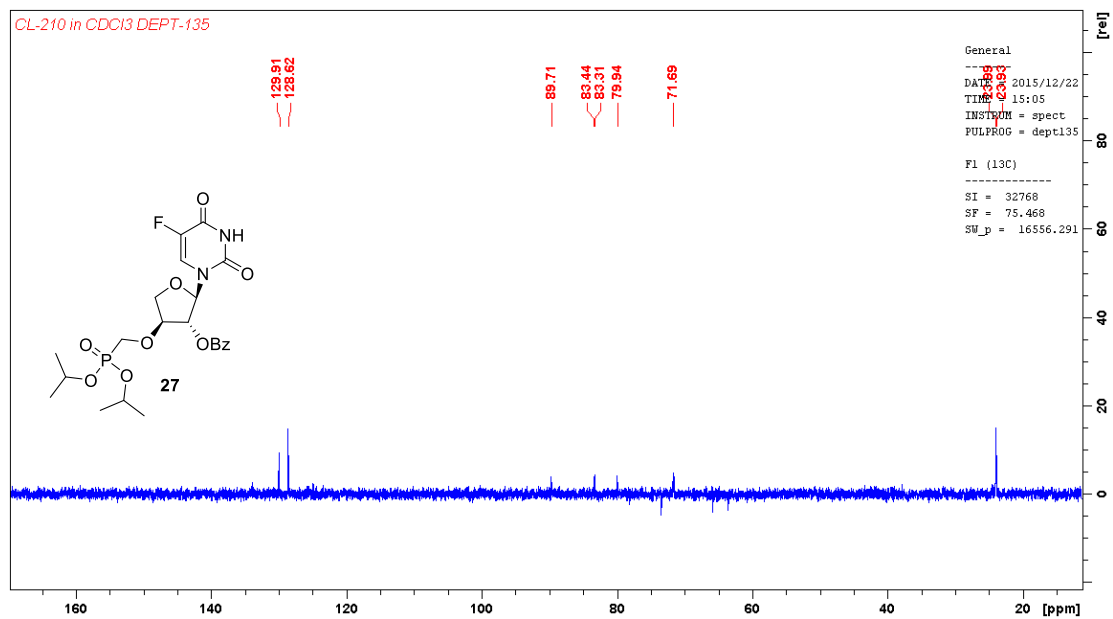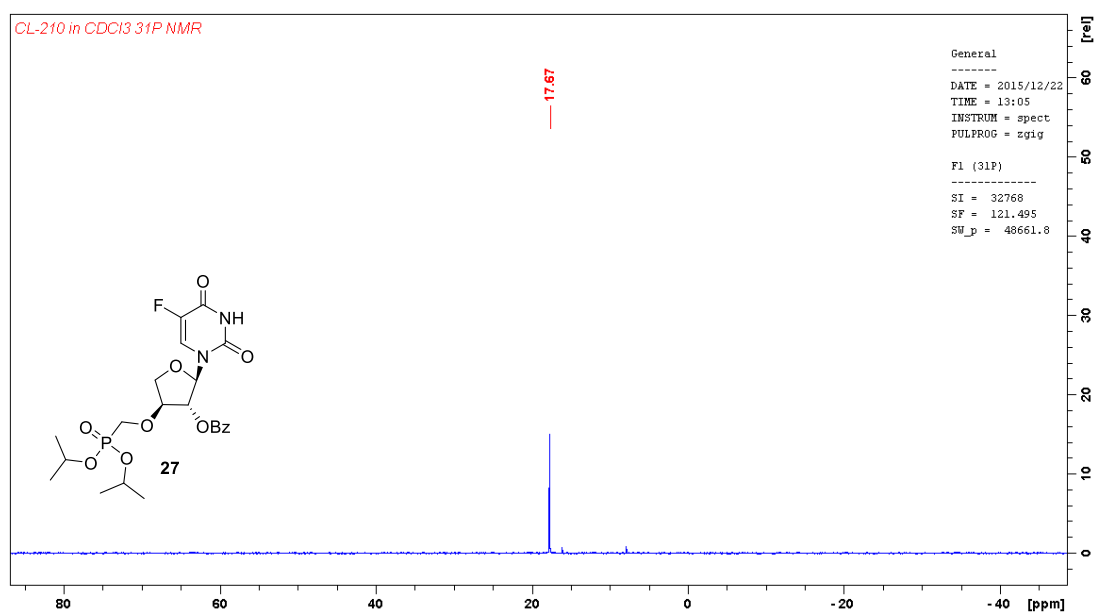



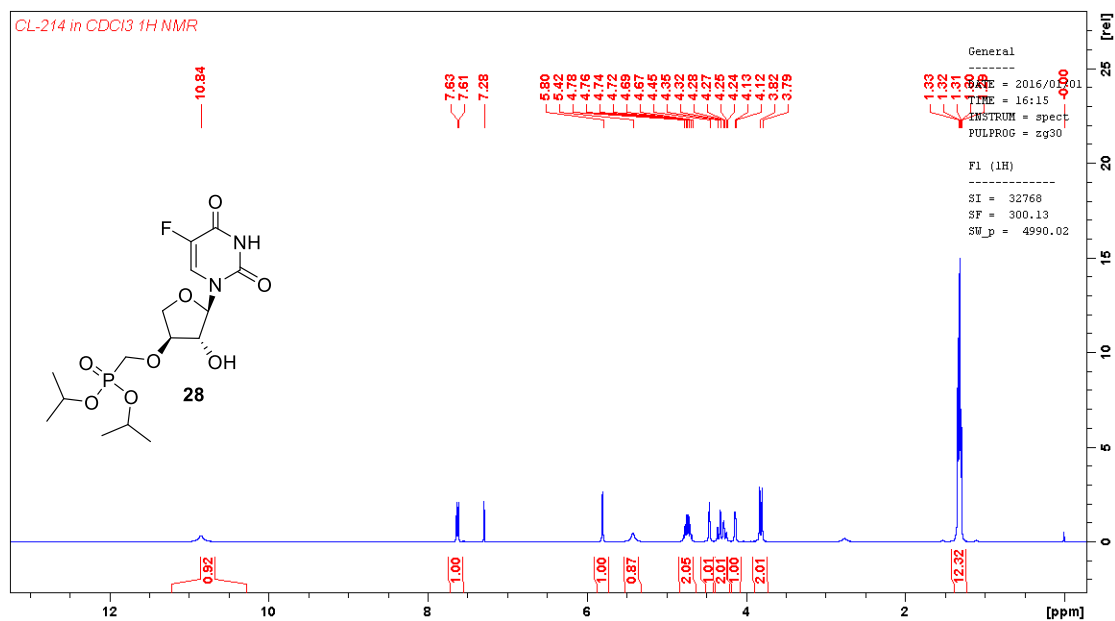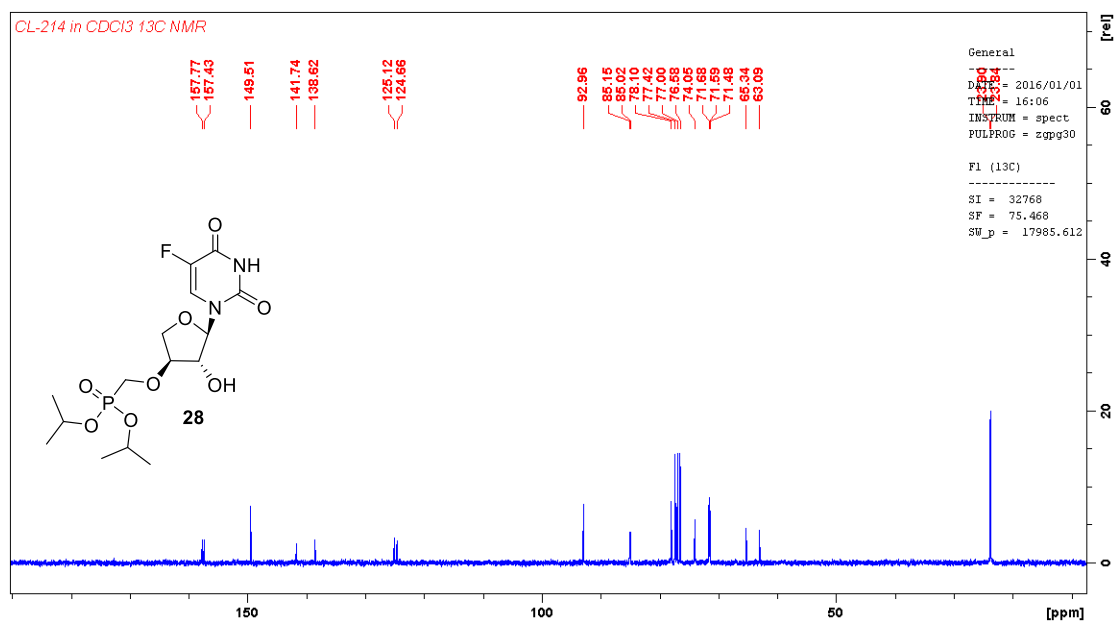

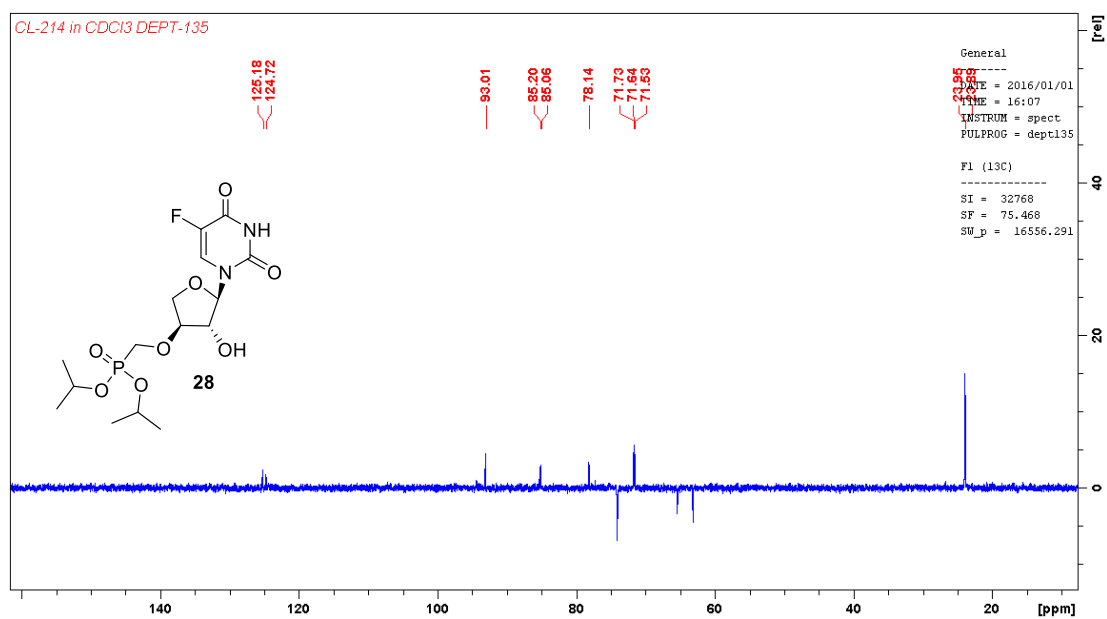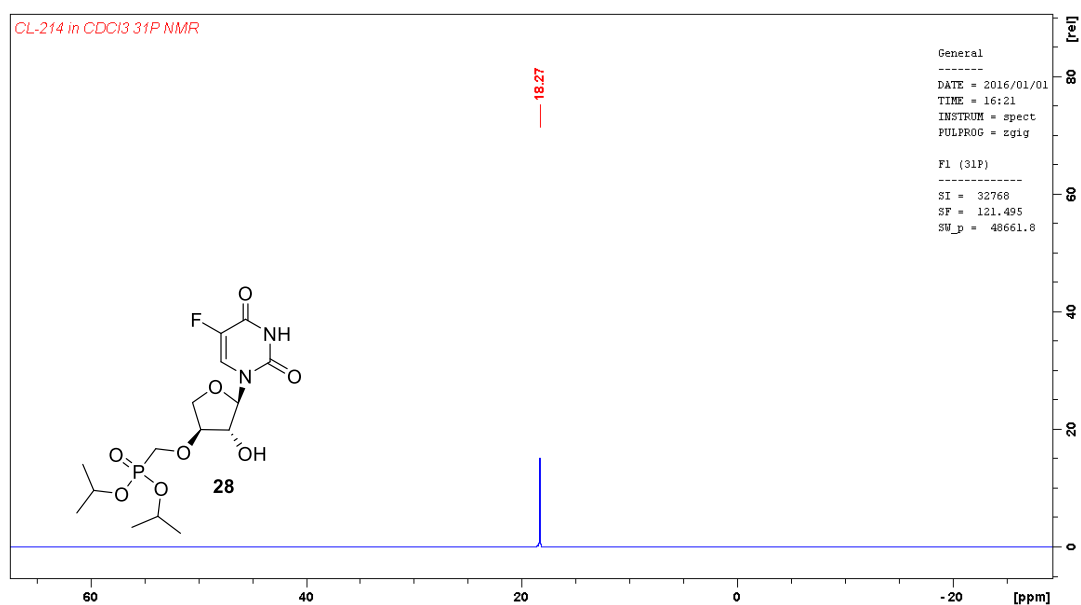

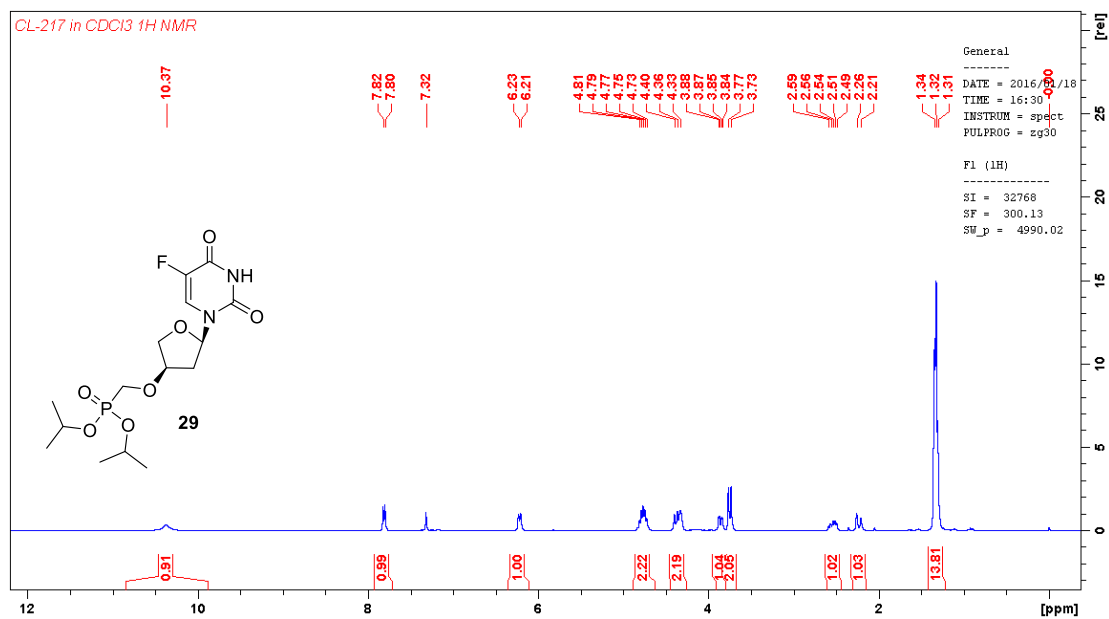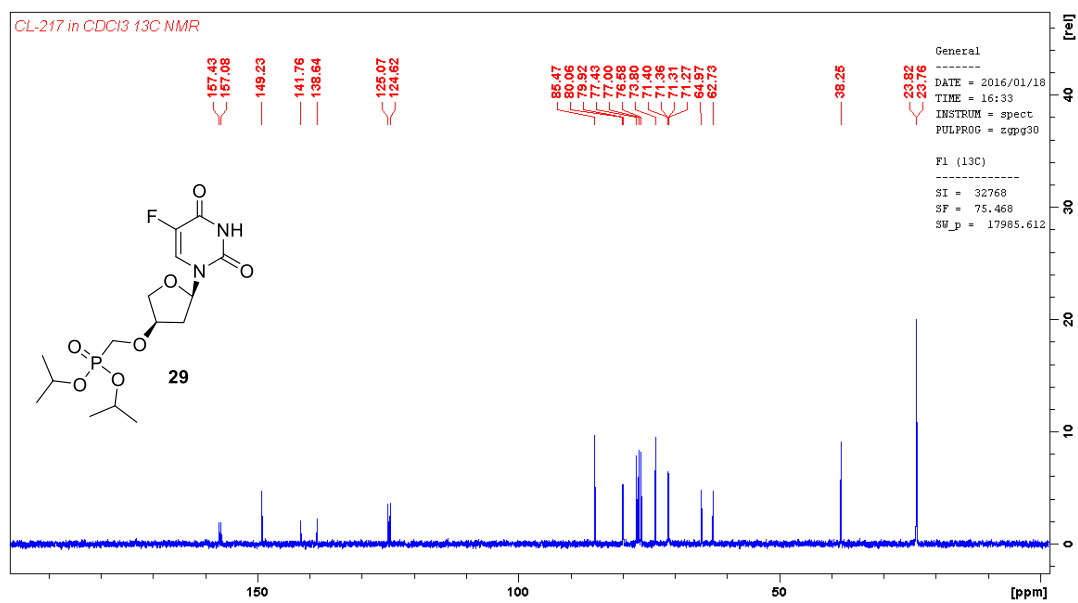

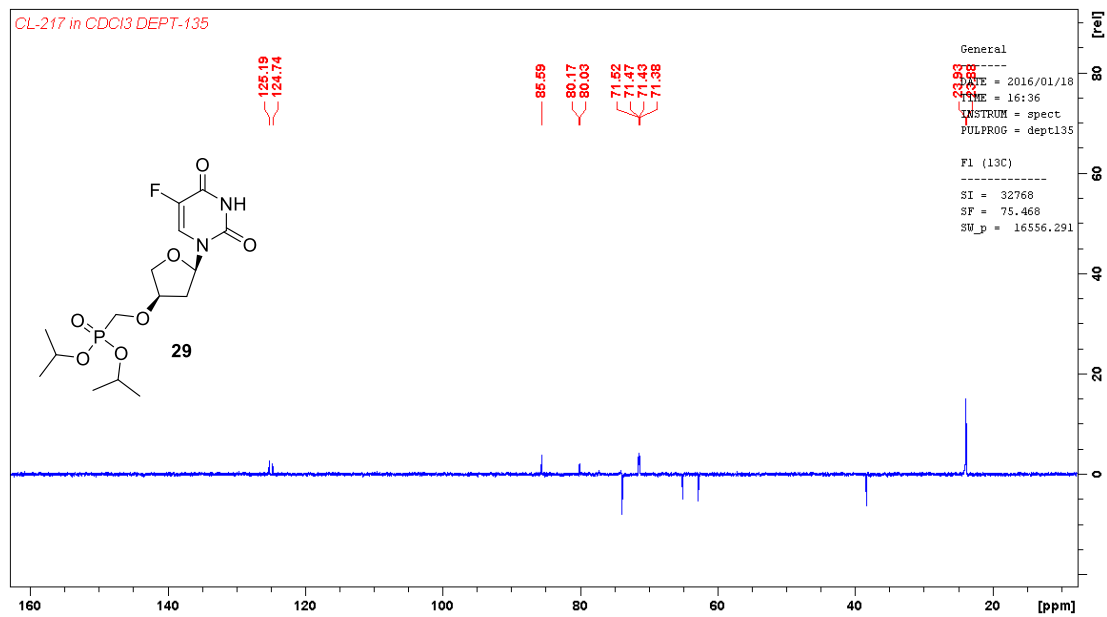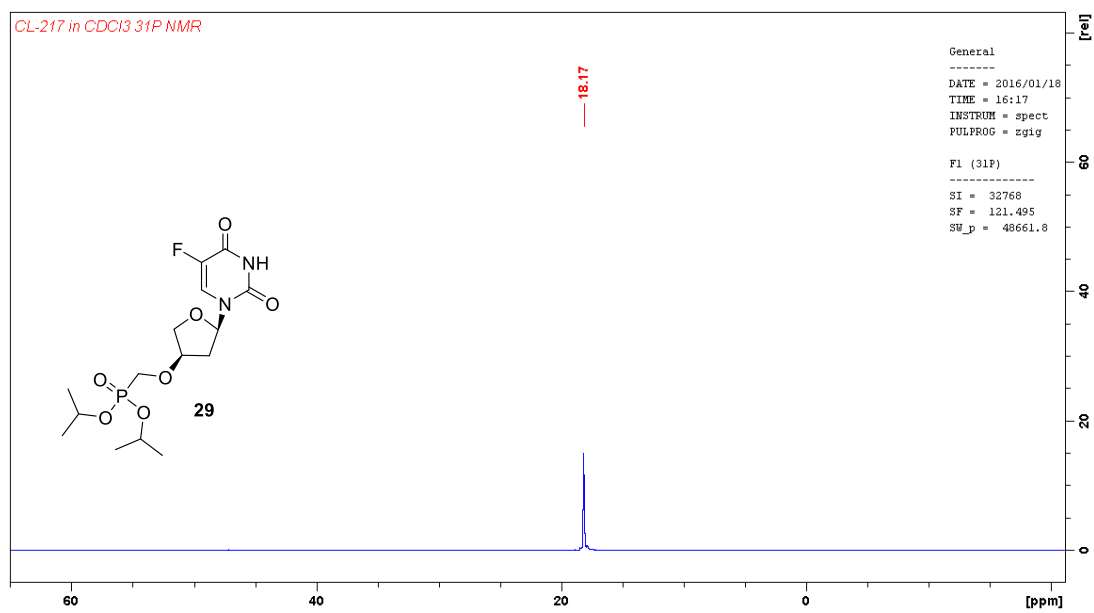

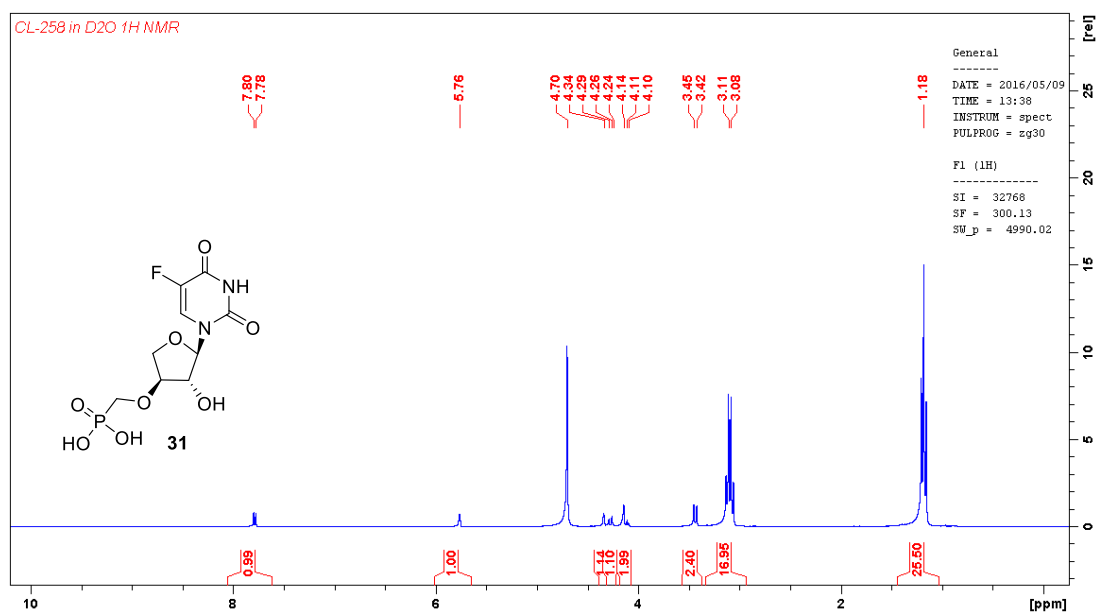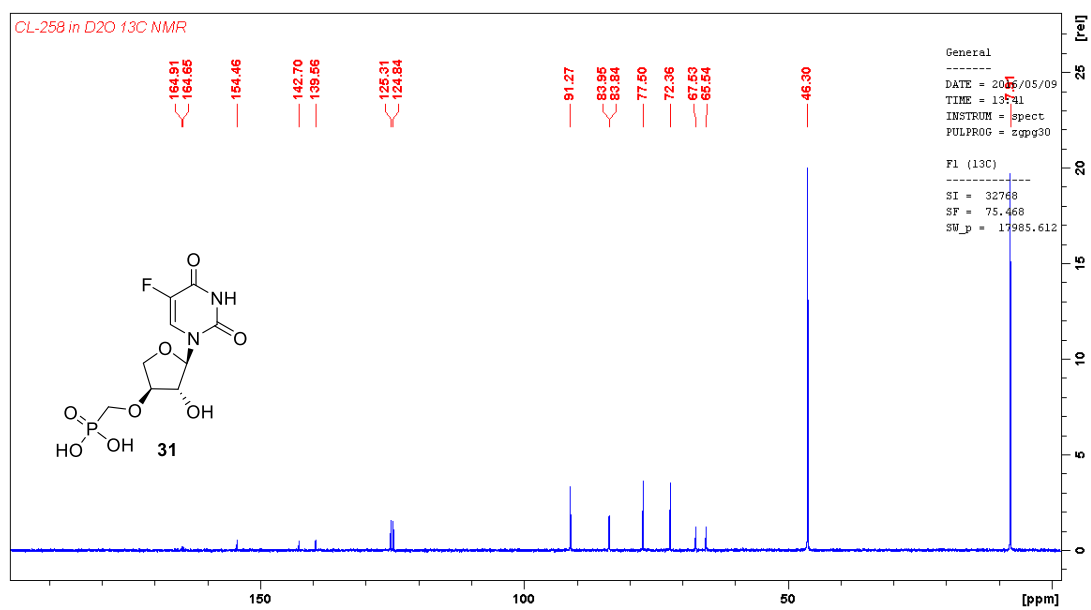

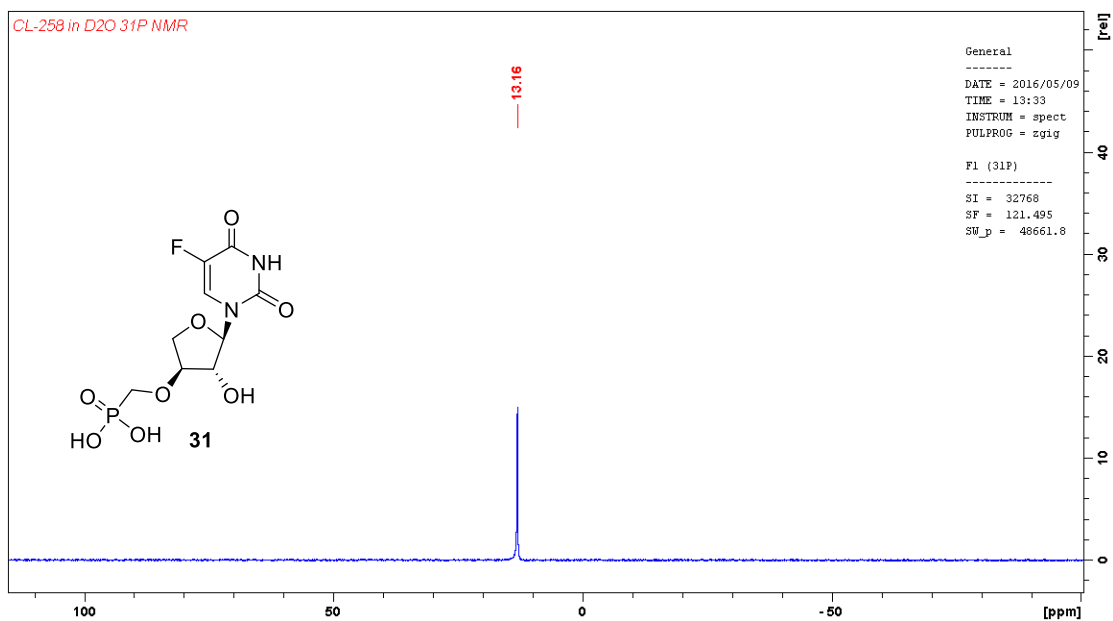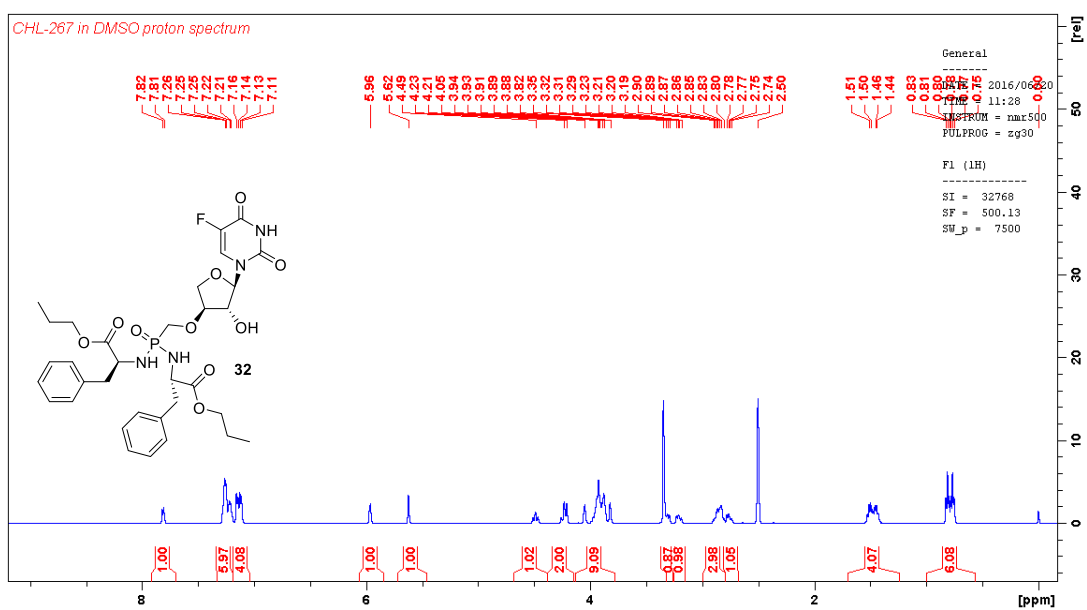

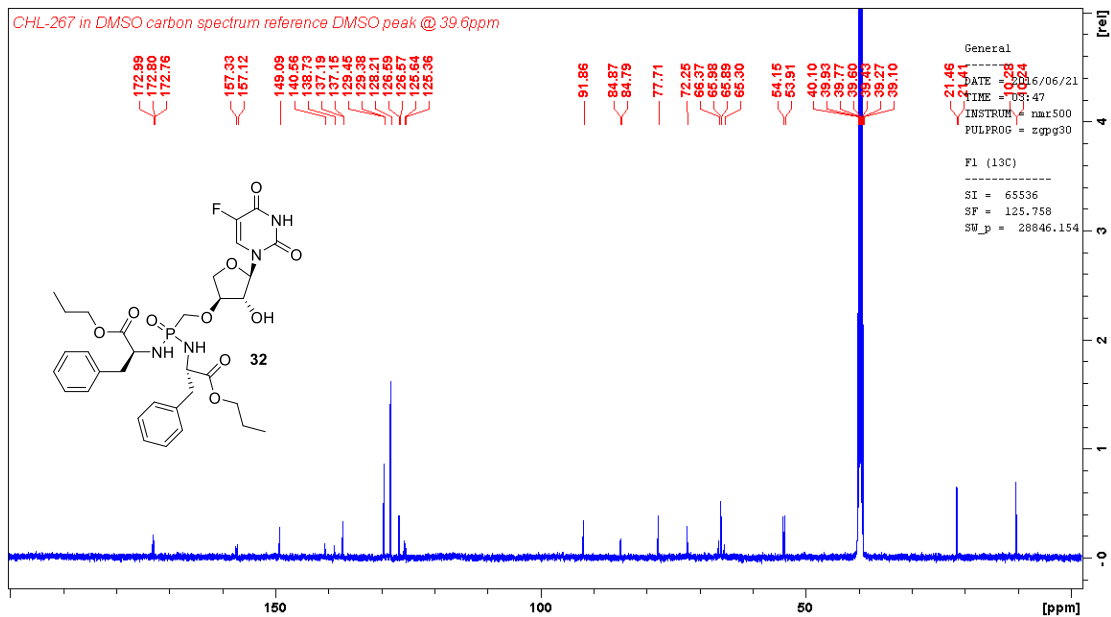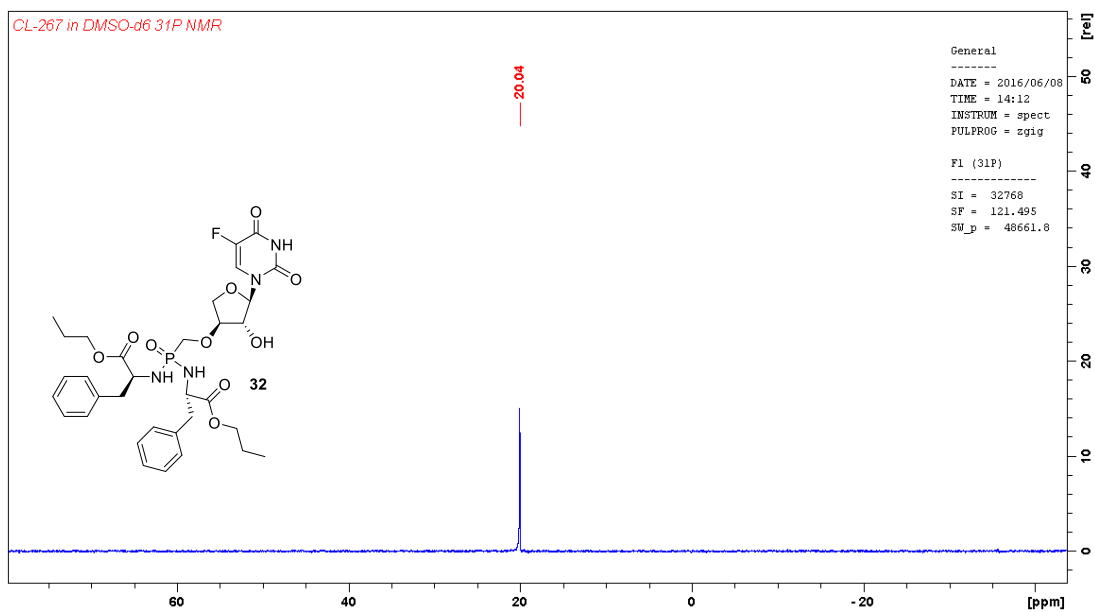

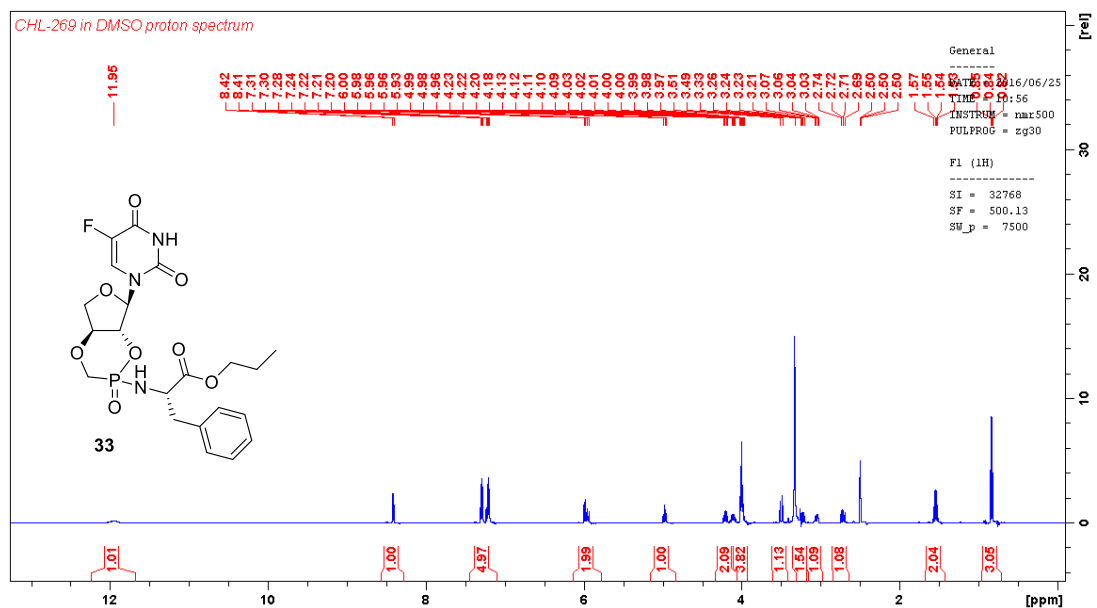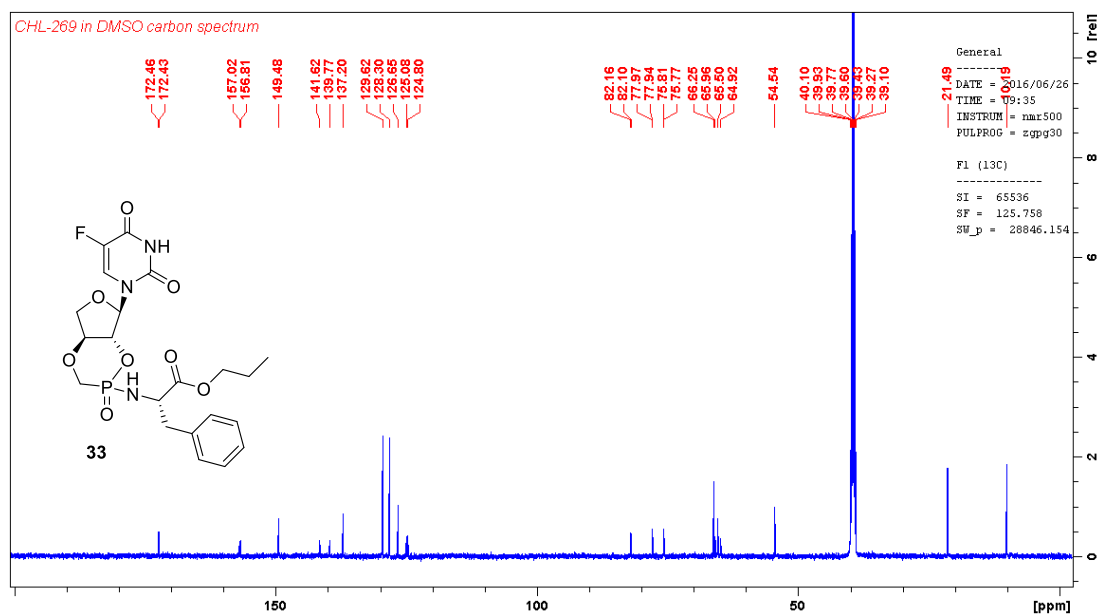



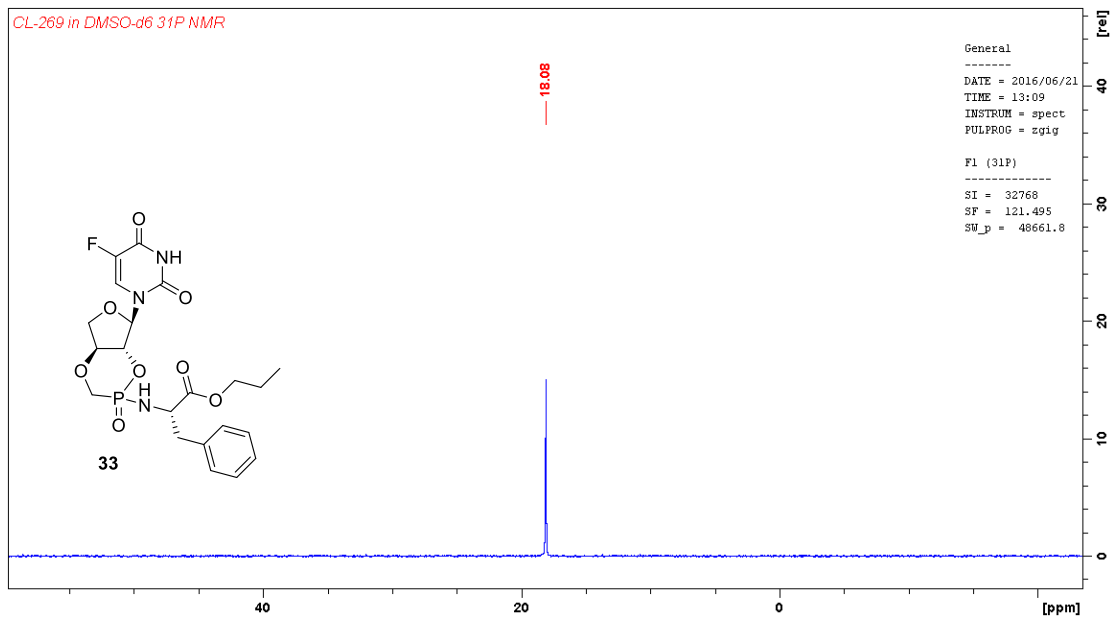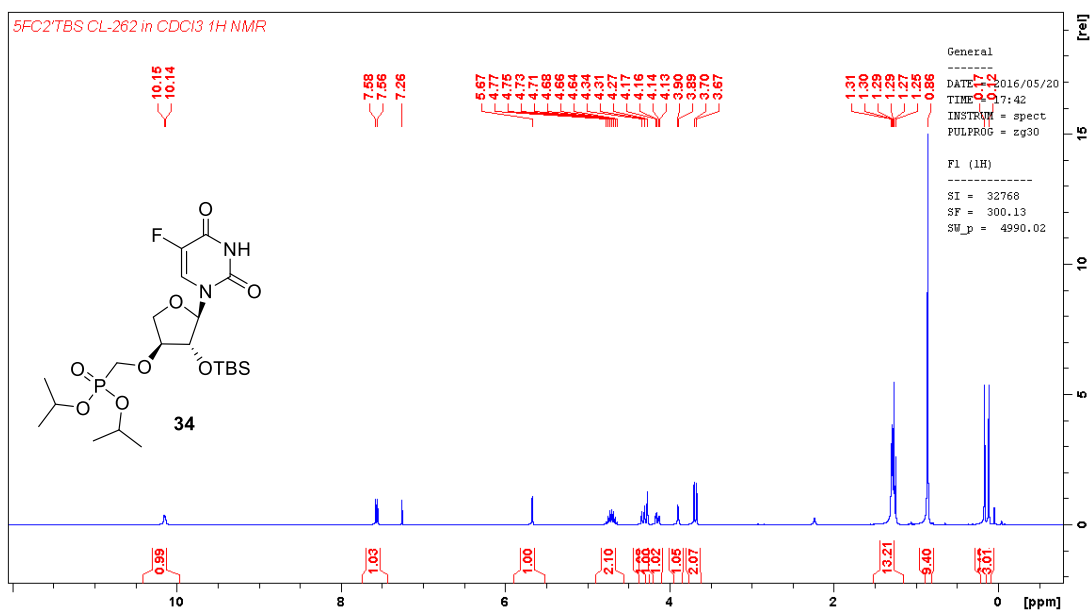





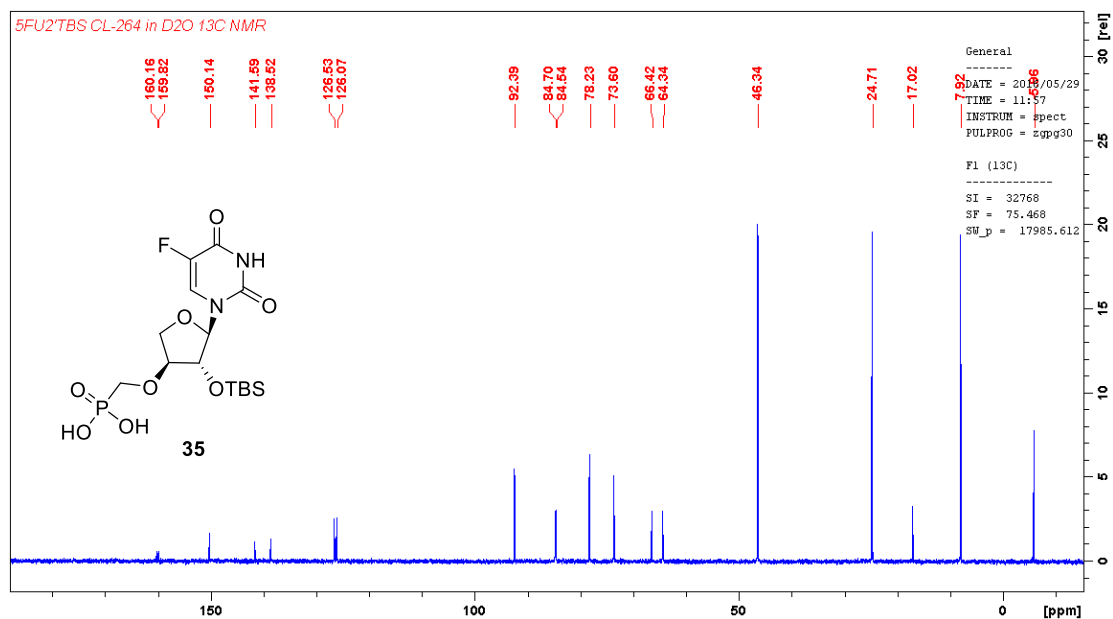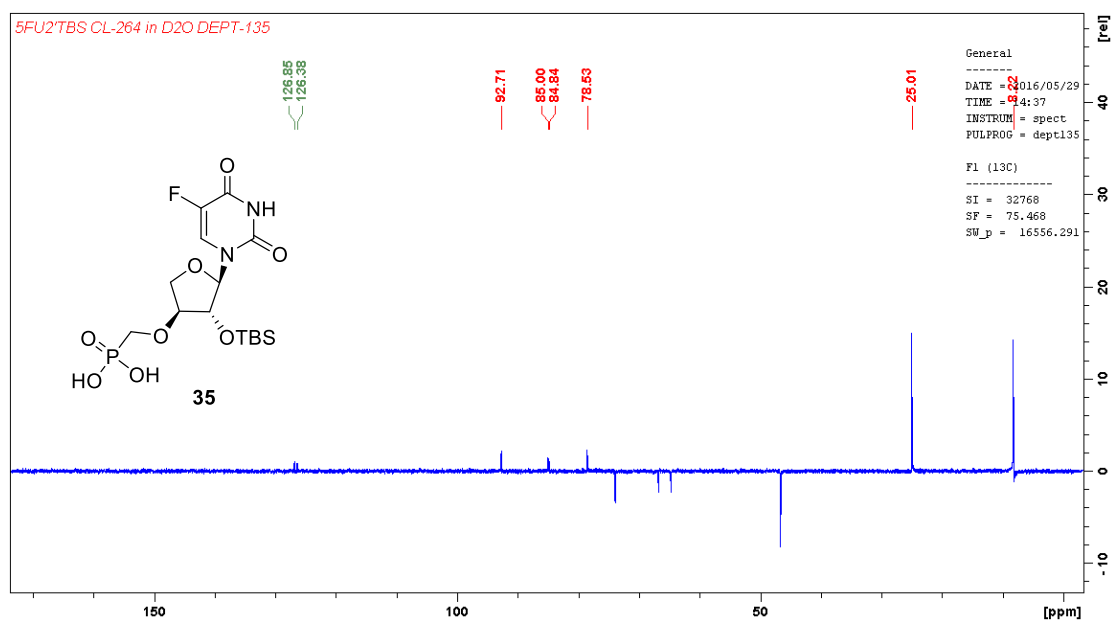

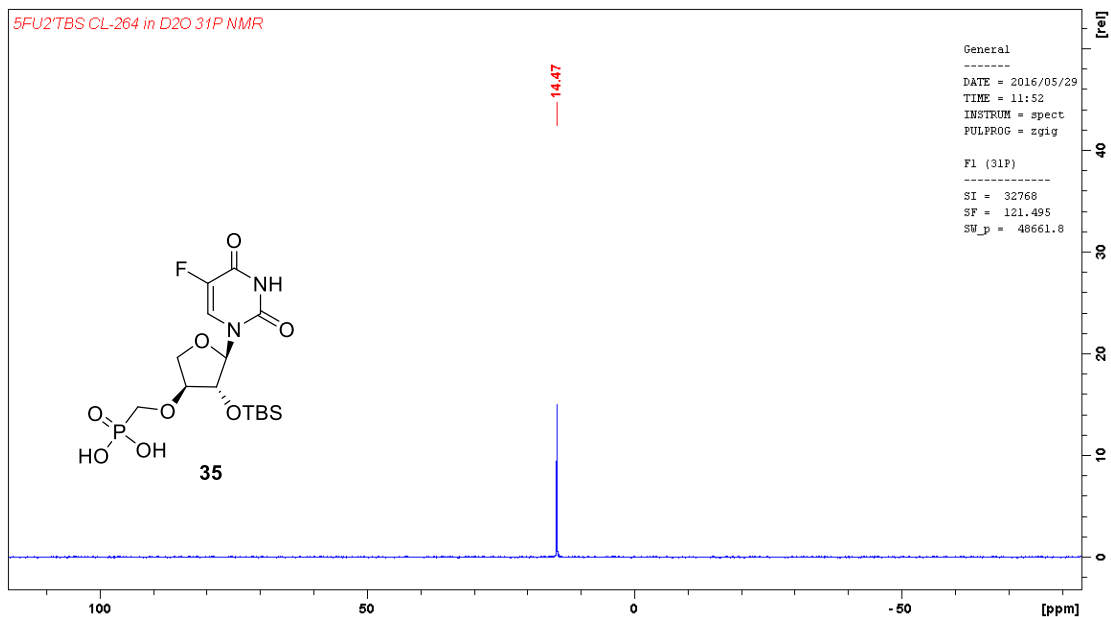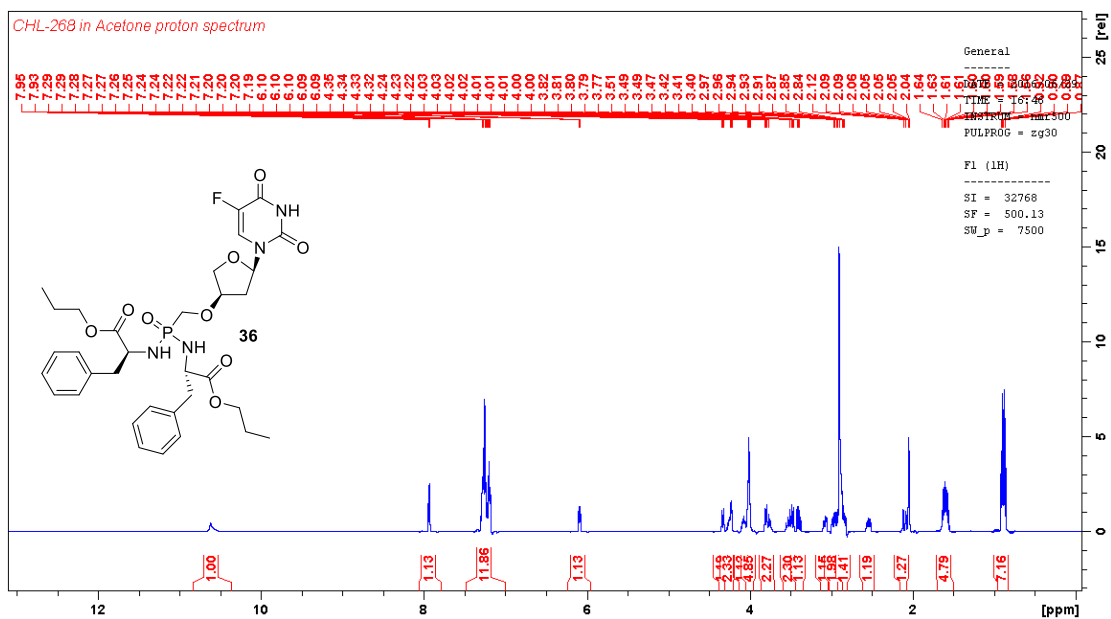

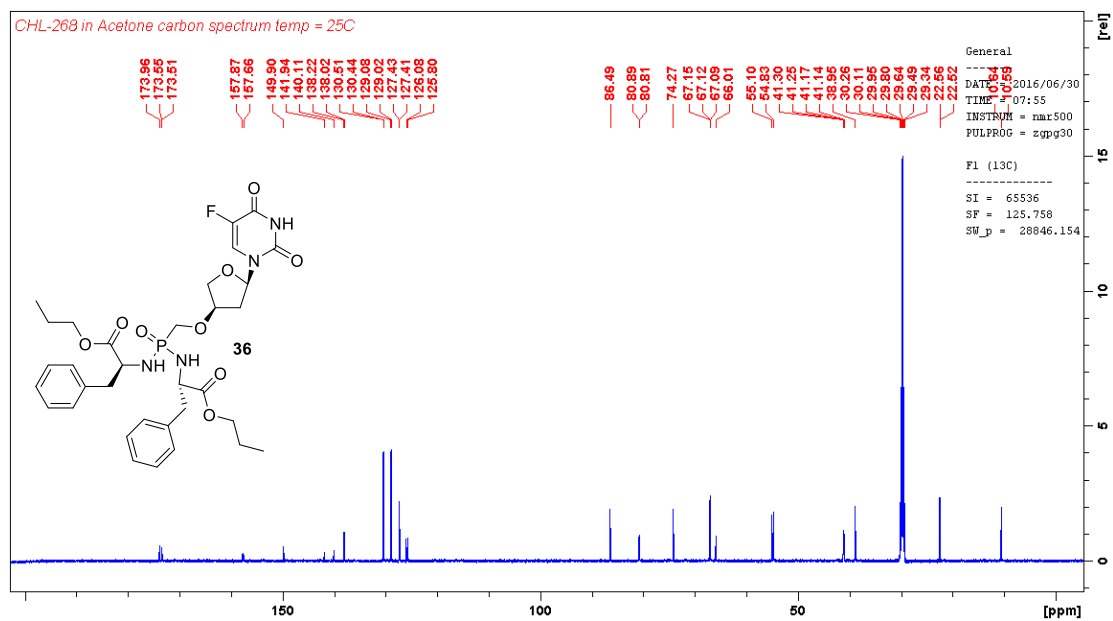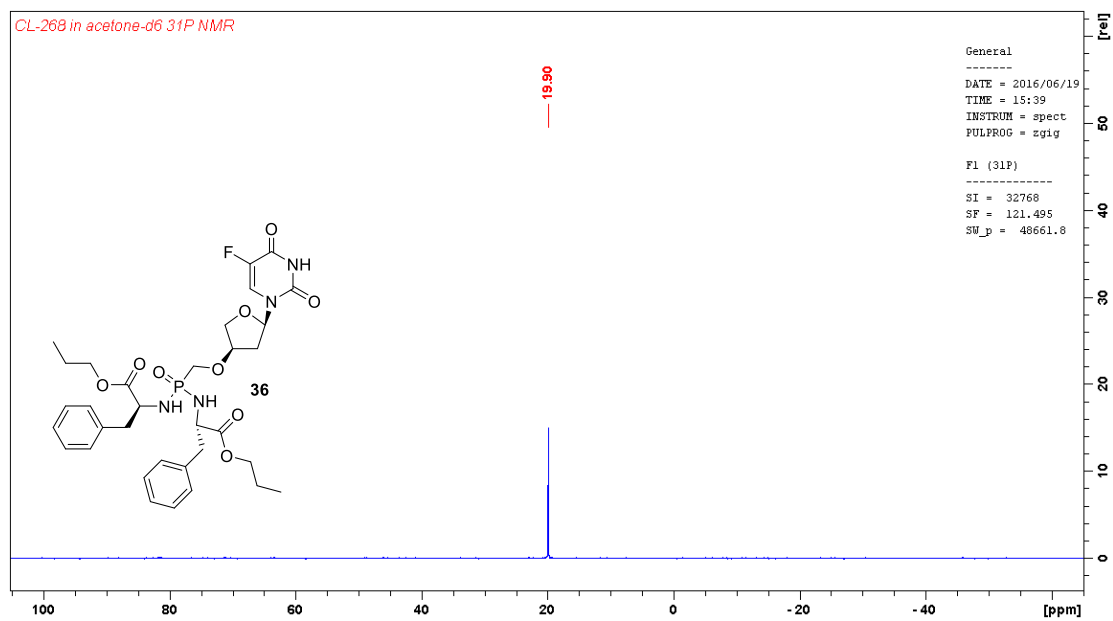

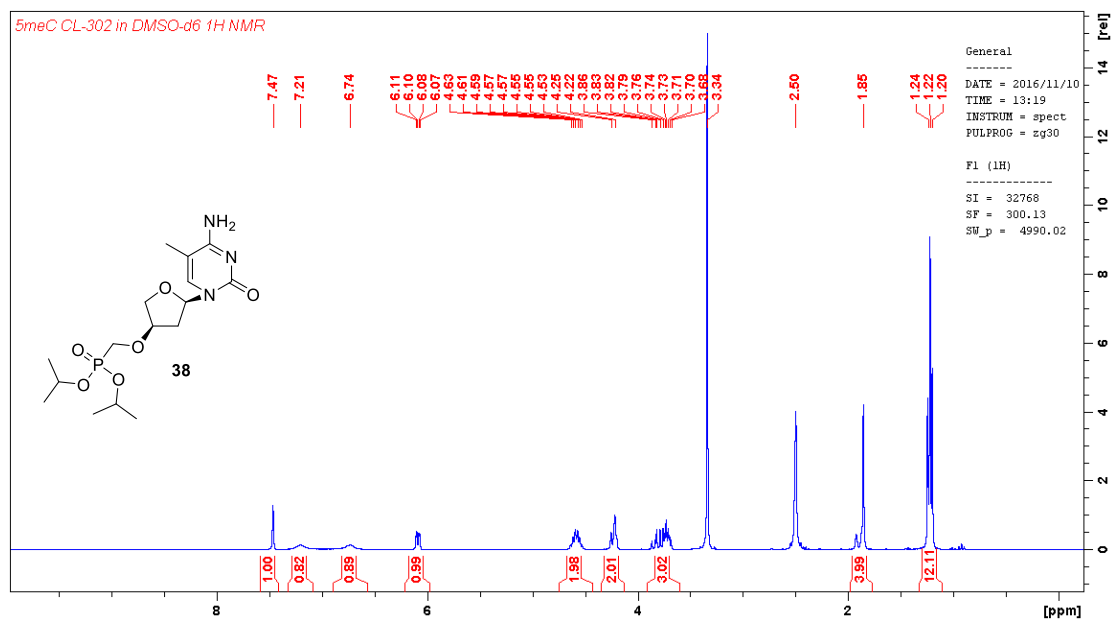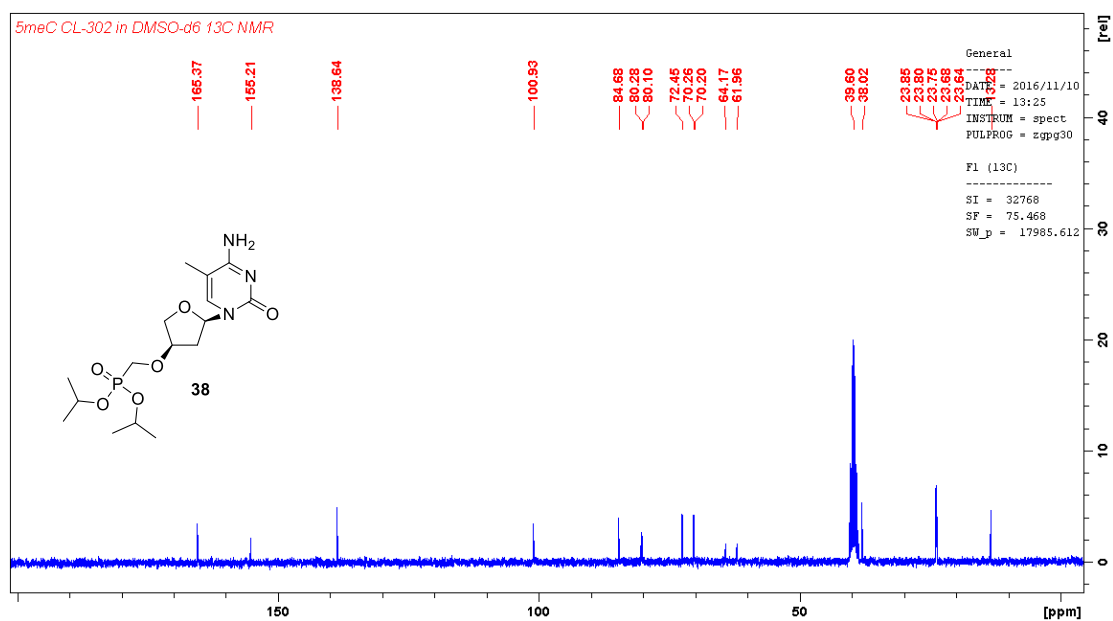

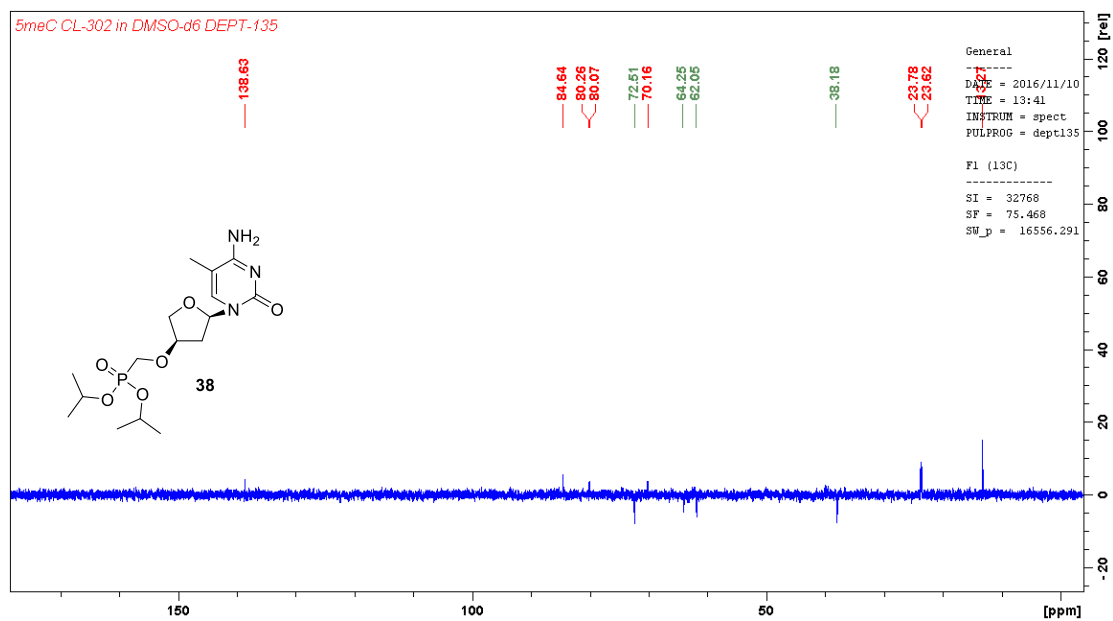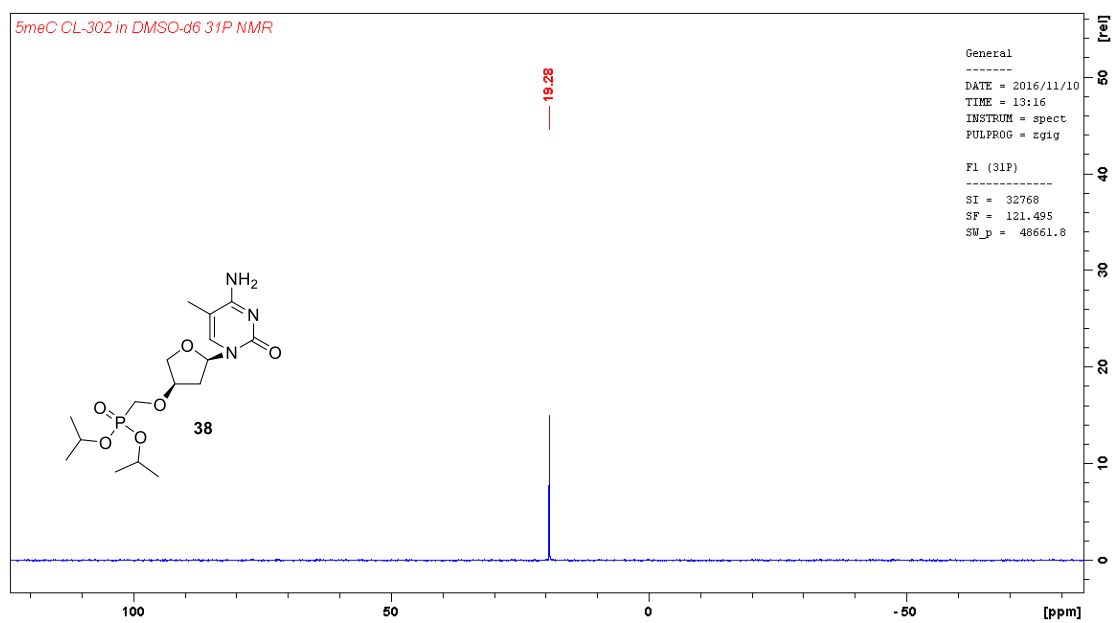



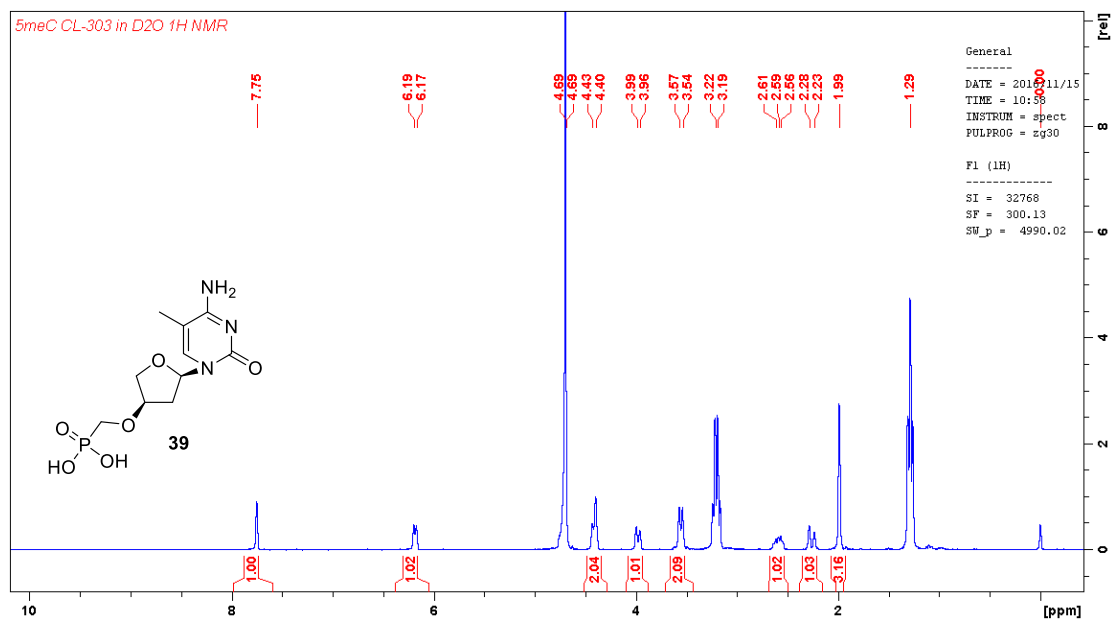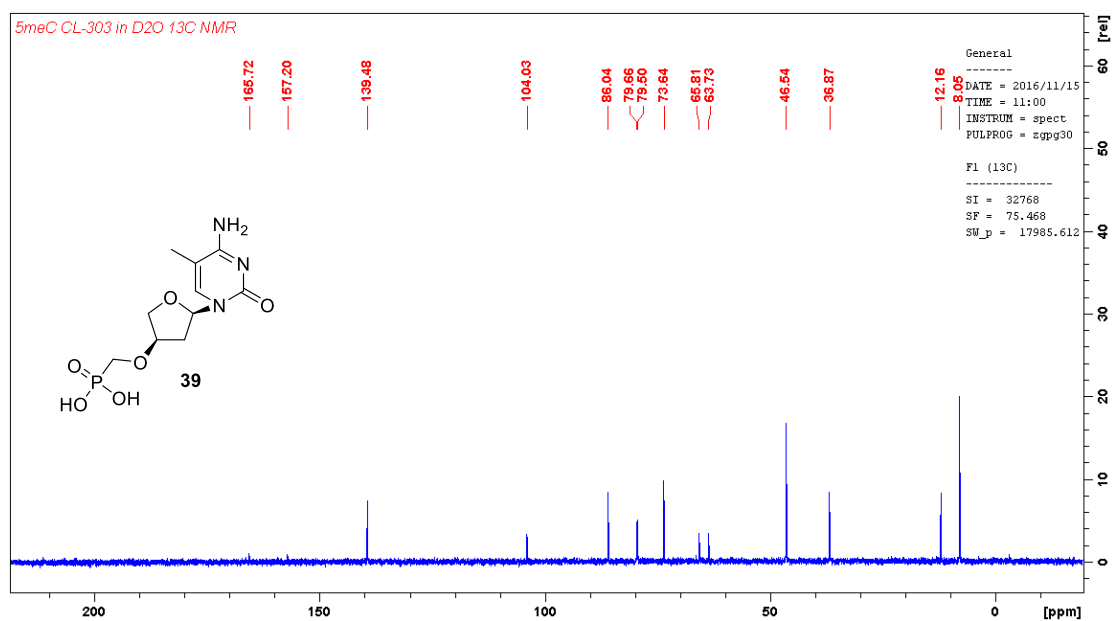

Supplement: c7ob01265a1.pdf [file c7ob01265a1.pdf]
